# Supplementary material for: Genomic insight into pathogenicity of dematiaceous fungus Corynespora cassiicola
Source: PeerJ. 2017 Jan 26;5:e2841. doi: 10.7717/peerj.2841 (PMC5274520; doi:10.7717/peerj.2841)
Supplement: Supplemental Information 2 [file peerj-05-2841-s002.xlsx]

## Sheet: Supplementary Table S2
	Supplementary Table S2: Virulence-related gene with reference to CAZyme, MEROPS and Lipase Engineering data
		Virulent Factor		CAZyme	Secreted Peptidase					Lipases		Gene annotation
Recorded disease	Gene	% PHI identity	PHI description	Family	Localization	Cysteine content	Peptidase family	Peptidase active site residue	MEROPS description	Lipase identity	Lipase Engineering Description	NR description	SwissProt description	Interpro ID	Interpro description
Aspergillosis	UM591_875	75.7838	PHI:565#chsG#CAA63928#Reduced virulence#Aspergillus fumigatus#Aspergillosis#Mouse	GT2.hmm								glycosyltransferase family 2 protein	Chitin synthase G	IPR004834|IPR004835|IPR013616|IPR029044	Chitin synthase|Chitin synthase N-terminal|Fungal chitin synthase|Nucleotide-diphospho-sugar transferases
	UM591_8532	55.6075	PHI:434#GEL2#EAL88984#Reduced virulence#Aspergillus fumigatus#Aspergillosis#Mouse	GH72.hmm	extr							hypothetical protein	1,3-beta-glucanosyltransferase gel2	IPR004886|IPR013781|IPR017853	Glucanosyltransferase|Glycoside hydrolase, catalytic domain|Glycoside hydrolase, superfamily
	UM591_776	61.0425	PHI:2528#SLY1#Q4WYU7#Lethal#Aspergillus fumigatus#Invasive pulmonary aspergillosis									similar to SEC1 family transport protein SLY1	-	IPR001619|IPR027482	Sec1-like protein|Sec1-like, domain 2
	UM591_919	57.315	PHI:2321#SidI#Q4WR83#Reduced virulence#Aspergillus fumigatus#Aspergillosis#Mouse									hypothetical protein	-	IPR000873|IPR020845|IPR025110	AMP-binding enzyme C-terminal domain|AMP-binding, conserved site|AMP-dependent synthetase/ligase
	UM591_2145	55.336	PHI:2510#msdS/AfmsdC#Q6PWQ1#Unaffected pathogenicity#Aspergillus fumigatus#Invasive pulmonary aspergillosis#Mouse	GH47.hmm	extr							mannosyl-oligosaccharide 1,2-alpha-mannosidase precursor	Probable mannosyl-oligosaccharide alpha-1,2-mannosidase 1B	IPR001382	Glycoside hydrolase, family 47
	UM591_2606	62.4254	PHI:2522#SPE2#Q4WEN8#Lethal#Aspergillus fumigatus#Invasive pulmonary aspergillosis									S-adenosylmethionine decarboxylase proenzyme 2	-	IPR001985|IPR016067|IPR018166	S-adenosylmethionine decarboxylase|S-adenosylmethionine decarboxylase, conserved site|S-adenosylmethionine decarboxylase, core
	UM591_3293	76.3819	PHI:2529#ERG10#Q4WCL5#Lethal#Aspergillus fumigatus#Invasive pulmonary aspergillosis									acetyl-CoA acetyltransferase IB	Acetyl-CoA acetyltransferase	IPR002155|IPR016038|IPR016039|IPR020613|IPR020615|IPR020616|IPR020617	Thiolase|Thiolase, C-terminal|Thiolase, N-terminal|Thiolase, acyl-enzyme intermediate active site|Thiolase, conserved site|Thiolase-like|Thiolase-like, subgroup
	UM591_3394	57.6271	PHI:335#CGRA#AAG28884#Reduced virulence#Aspergillus fumigatus#Aspergillosis#Mouse									hypothetical protein	rRNA-processing protein CGR1	IPR005579	Cgr1
	UM591_3729	59.8916	PHI:2537#TRR1#Q4WQJ0#Lethal#Aspergillus fumigatus#Invasive pulmonary aspergillosis									hypothetical protein	Thioredoxin reductase	IPR000103|IPR001327|IPR005982|IPR008255|IPR013027|IPR023753	FAD-dependent pyridine nucleotide-disulphide oxidoreductase|Pyridine nucleotide-disulphide oxidoreductase, FAD/NAD(P)-binding domain|Pyridine nucleotide-disulphide oxidoreductase, NAD-binding domain|Pyridine nucleotide-disulphide oxidoreductase, class-II|Pyridine nucleotide-disulphide oxidoreductase, class-II, active site|Thioredoxin reductase
	UM591_3739	71.4286	PHI:2530#TUB1#Q4WKG5#Lethal#Aspergillus fumigatus#Invasive pulmonary aspergillosis									hypothetical protein	Tubulin alpha chain	IPR000217|IPR002452|IPR003008|IPR008280|IPR017975|IPR018316|IPR023123	Alpha tubulin|Tubulin|Tubulin, C-terminal|Tubulin, conserved site|Tubulin/FtsZ, 2-layer sandwich domain|Tubulin/FtsZ, C-terminal|Tubulin/FtsZ, GTPase domain
	UM591_4445	82.1586	PHI:2541#OLE1#Q4WGR1#Lethal#Aspergillus fumigatus#Invasive pulmonary aspergillosis									hypothetical protein	Acyl-CoA desaturase	IPR001199|IPR001522|IPR005804|IPR009160|IPR015876|IPR018506	Cytochrome b5, heme-binding site|Cytochrome b5-like heme/steroid binding domain|Delta-9 acyl-CoA desaturase, haem/steroid binding domain-containing|Fatty acid desaturase, type 1|Fatty acid desaturase, type 1, C-terminal|Fatty acid desaturase, type 1, core
	UM591_4501	70.2465	PHI:2306#clxA#XM_746454.#Unaffected pathogenicity#Aspergillus fumigatus#Aspergillosis#Mouse									hypothetical protein	Calnexin homolog	IPR001580|IPR008985|IPR009033|IPR013320|IPR018124	Calreticulin/calnexin|Calreticulin/calnexin, P domain|Calreticulin/calnexin, conserved site|Concanavalin A-like lectin/glucanase, subgroup|Concanavalin A-like lectin/glucanases superfamily
	UM591_4739	54.9603	PHI:2514#PFS2#Q4X1Y0#Lethal#Aspergillus fumigatus#Invasive pulmonary aspergillosis									hypothetical protein	Polyadenylation factor subunit 2	IPR001680|IPR015943|IPR017986|IPR020472	G-protein beta WD-40 repeat|WD40 repeat|WD40-repeat-containing domain|WD40/YVTN repeat-like-containing domain
	UM591_4966	72.8774	PHI:2532#HEM15#Q4WUA3#Lethal#Aspergillus fumigatus#Invasive pulmonary aspergillosis									hypothetical protein	Ferrochelatase, mitochondrial	IPR001015|IPR019772	Ferrochelatase|Ferrochelatase, active site
	UM591_4979	67.6	PHI:2536#MET2#Q4WU51#Lethal#Aspergillus fumigatus#Invasive pulmonary aspergillosis									hypothetical protein	Homoserine O-acetyltransferase	IPR000073|IPR008220|IPR029058	Alpha/Beta hydrolase fold|Alpha/beta hydrolase fold-1|Homoserine acetyltransferase
	UM591_5097	50.2439	PHI:2322#SidH#Q4WF54#Reduced virulence#Aspergillus fumigatus#Aspergillosis#Mouse									enoyl-CoA hydratase/isomerase	-	IPR001753|IPR018376|IPR029045	ClpP/crotonase-like domain|Crotonase superfamily|Enoyl-CoA hydratase/isomerase, conserved site
	UM591_5364	65.9686	PHI:2524#nudC#Q70ZY8#Lethal#Aspergillus fumigatus#Invasive pulmonary aspergillosis									hypothetical protein	Nuclear movement protein nudC	IPR007052|IPR008978	CS domain|HSP20-like chaperone
	UM591_5513	73.4767	PHI:2518#MET16#Q4WWN9#Lethal#Aspergillus fumigatus#Invasive pulmonary aspergillosis									similar to phosphoadenosine phosphosulfate reductase	Phosphoadenosine phosphosulfate reductase	IPR002500|IPR004511|IPR011800|IPR014729	Phosphoadenosine phosphosulphate reductase|Phosphoadenosine phosphosulphate reductase CysH|Phosphoadenosine phosphosulphate/adenosine 5'-phosphosulphate reductase|Rossmann-like alpha/beta/alpha sandwich fold
	UM591_6021	52.9545	PHI:2527#SEC31#Q4X0M4#Lethal#Aspergillus fumigatus#Invasive pulmonary aspergillosis									hypothetical protein	Protein transport protein SEC31	IPR001680|IPR009917|IPR015943|IPR017986	Steroid receptor RNA activator-protein/coat protein complex II, Sec31|WD40 repeat|WD40-repeat-containing domain|WD40/YVTN repeat-like-containing domain
	UM591_6370	63.4766	PHI:2534#ERG11A#Q4WNT5#Lethal#Aspergillus fumigatus#Invasive pulmonary aspergillosis									hypothetical protein	Eburicol 14-alpha-demethylase	IPR001128|IPR002403|IPR017972	Cytochrome P450|Cytochrome P450, E-class, group IV|Cytochrome P450, conserved site
	UM591_6904	76.6917	PHI:2548#KRR1#AAB96910.2#Lethal#Aspergillus fumigatus#Invasive pulmonary aspergillosis									14-3-3 protein epsilon	14-3-3 protein homolog	IPR000308|IPR023409|IPR023410	14-3-3 domain|14-3-3 protein|14-3-3 protein, conserved site
	UM591_6945	84.6269	PHI:2513#GFA1#E9R5E2#Lethal#Aspergillus fumigatus#Invasive pulmonary aspergillosis									hypothetical protein	Glutamine--fructose-6-phosphate aminotransferase [isomerizing]	IPR001347|IPR005855|IPR017932|IPR029055	Glucosamine-fructose-6-phosphate aminotransferase, isomerising|Glutamine amidotransferase type 2 domain|Nucleophile aminohydrolases, N-terminal|Sugar isomerase (SIS)
	UM591_7524	64.8712	PHI:2541#OLE1#Q4WGR1#Lethal#Aspergillus fumigatus#Invasive pulmonary aspergillosis									hypothetical protein	Acyl-CoA desaturase	IPR001199|IPR001522|IPR005804|IPR009160|IPR015876|IPR018506	Cytochrome b5, heme-binding site|Cytochrome b5-like heme/steroid binding domain|Delta-9 acyl-CoA desaturase, haem/steroid binding domain-containing|Fatty acid desaturase, type 1|Fatty acid desaturase, type 1, C-terminal|Fatty acid desaturase, type 1, core
	UM591_7561	78.3925	PHI:2533#FKS1#Q4WLT4#Lethal#Aspergillus fumigatus#Invasive pulmonary aspergillosis	GT48.hmm								beta-(1,3)-glucan synthase	1,3-beta-glucan synthase component FKS1	IPR003440|IPR026899	1,3-beta-glucan synthase subunit FKS1-like, domain-1|Glycosyl transferase, family 48
	UM591_7898	59.6567	PHI:2526#LUC7#Q4WMR3#Lethal#Aspergillus fumigatus#Invasive pulmonary aspergillosis									LUC7-related protein	-	IPR004882	Luc7-related
	UM591_7902	59.401	PHI:2549#MAK5#Q4WMS3#Lethal#Aspergillus fumigatus#Invasive pulmonary aspergillosis									ATP-dependent RNA helicase MAK5	ATP-dependent RNA helicase MAK5	IPR000629|IPR001650|IPR011545|IPR014001|IPR014014|IPR027417	DNA/RNA helicase, DEAD/DEAH box type, N-terminal|Helicase, C-terminal|Helicase, superfamily 1/2, ATP-binding domain|P-loop containing nucleoside triphosphate hydrolase|RNA helicase, ATP-dependent, DEAD-box, conserved site|RNA helicase, DEAD-box type, Q motif
	UM591_7980	64.1956	PHI:2521#GUS1#Q4WEM7#Lethal#Aspergillus fumigatus#Invasive pulmonary aspergillosis									-	Probable glutamate--tRNA ligase, cytoplasmic	IPR000924|IPR001412|IPR004526|IPR010987|IPR011035|IPR014729|IPR020056|IPR020058|IPR020059|IPR020061	Aminoacyl-tRNA synthetase, class I, conserved site|Glutamyl-tRNA synthetase, archaeal/eukaryotic cytosolic|Glutamyl/glutaminyl-tRNA synthetase|Glutamyl/glutaminyl-tRNA synthetase, class Ib, alpha-bundle domain|Glutamyl/glutaminyl-tRNA synthetase, class Ib, anti-codon binding domain|Glutamyl/glutaminyl-tRNA synthetase, class Ib, catalytic domain|Glutathione S-transferase, C-terminal-like|Ribosomal…
	UM591_8228	56.2063	PHI:496#PPOC#EAL92371#Increased virulence (Hypervirulence)#Aspergillus fumigatus#Aspergillosis#Mouse									hypothetical protein	Linoleate 10R-lipoxygenase	IPR001128|IPR002007|IPR010255|IPR019791	Cytochrome P450|Haem peroxidase|Haem peroxidase, animal|Haem peroxidase, animal, subgroup
	UM591_8240	68.1648	PHI:2548#KRR1#AAB96910.2#Lethal#Aspergillus fumigatus#Invasive pulmonary aspergillosis									14-3-3 protein	14-3-3 protein homolog	IPR000308|IPR023409|IPR023410	14-3-3 domain|14-3-3 protein|14-3-3 protein, conserved site
	UM591_8281	63.2735	PHI:2542#ERG12#Q4WP25#Lethal#Aspergillus fumigatus#Invasive pulmonary aspergillosis									similar to mevalonate kinase	-	IPR006203|IPR006204|IPR006205|IPR006206|IPR013750|IPR014721|IPR020568	GHMP kinase N-terminal domain|GHMP kinase, ATP-binding, conserved site|GHMP kinase, C-terminal domain|Mevalonate kinase|Mevalonate/galactokinase|Ribosomal protein S5 domain 2-type fold|Ribosomal protein S5 domain 2-type fold, subgroup
	UM591_8287	64.8752	PHI:2535#ERG11B#E9QY26#Lethal#Aspergillus fumigatus#Invasive pulmonary aspergillosis									cytochrome P450 51	Eburicol 14-alpha-demethylase	IPR001128|IPR002403|IPR017972	Cytochrome P450|Cytochrome P450, E-class, group IV|Cytochrome P450, conserved site
	UM591_8775	61.9469	PHI:2520#LYS4#Q4WUL6#Lethal#Aspergillus fumigatus#Invasive pulmonary aspergillosis									homoaconitase, mitochondrial precursor	Homoaconitase, mitochondrial	IPR000573|IPR001030|IPR004418|IPR015928|IPR015931|IPR015932|IPR015937|IPR018136	Aconitase A/isopropylmalate dehydratase small subunit, swivel|Aconitase family, 4Fe-4S cluster binding site|Aconitase/3-isopropylmalate dehydratase large subunit, alpha/beta/alpha|Aconitase/3-isopropylmalate dehydratase large subunit, alpha/beta/alpha, subdomain 1/3|Aconitase/3-isopropylmalate dehydratase large subunit, alpha/beta/alpha, subdomain 2|Aconitase/3-isopropylmalate dehydratase, swivel…
	UM591_9058	73.2584	PHI:2519#LYS9#Q4WQ27#Lethal#Aspergillus fumigatus#Invasive pulmonary aspergillosis									hypothetical protein	Saccharopine dehydrogenase [NADP(+), L-glutamate-forming]	IPR005097|IPR016040	NAD(P)-binding domain|Saccharopine dehydrogenase /Homospermidine synthase
	UM591_9730	56.1047	PHI:2543#GCD6#Q4WLS1#Lethal#Aspergillus fumigatus#Invasive pulmonary aspergillosis									hypothetical protein	-	IPR001451|IPR003307|IPR005835|IPR011004|IPR016021|IPR016024|IPR029044	Armadillo-type fold|Bacterial transferase hexapeptide repeat|MIF4-like, type 1/2/3|Nucleotide-diphospho-sugar transferases|Nucleotidyl transferase|Trimeric LpxA-like|W2 domain
	UM591_9779	62.7451	PHI:2538#AUR1#Q4WXL8#Lethal#Aspergillus fumigatus#Invasive pulmonary aspergillosis									aureobasidin resistance protein Aur1	Inositol phosphorylceramide synthase catalytic subunit aur1	IPR000326	Phosphatidic acid phosphatase type 2/haloperoxidase
	UM591_10446	53.5613	PHI:2525#TOM40#Q4WDL0#Lethal#Aspergillus fumigatus#Invasive pulmonary aspergillosis									similar to mitochondrial import receptor subunit TOM40	-	IPR023614|IPR027246	Eukaryotic porin/Tom40|Porin domain
	UM591_10698	52.2374	PHI:494#PPOA#EAL89712#Increased virulence (Hypervirulence)#Aspergillus fumigatus#Aspergillosis#Mouse									hypothetical protein	Psi-producing oxygenase A	IPR001128|IPR002007|IPR010255|IPR019791	Cytochrome P450|Haem peroxidase|Haem peroxidase, animal|Haem peroxidase, animal, subgroup
	UM591_10709	74.3902	PHI:2517#TRPS#Q4X0J6#Lethal#Aspergillus fumigatus#Invasive pulmonary aspergillosis									hypothetical protein	Tryptophan synthase	IPR001898|IPR001926|IPR002028|IPR004331|IPR006653|IPR006654|IPR011060|IPR013785|IPR018204|IPR023026	Aldolase-type TIM barrel|Ribulose-phosphate binding barrel|SPX, N-terminal|Sodium/sulphate symporter|Tryptophan synthase beta chain/beta chain-like|Tryptophan synthase beta subunit-like PLP-dependent enzymes superfamily|Tryptophan synthase, alpha chain|Tryptophan synthase, alpha chain, active site|Tryptophan synthase, beta chain|Tryptophan synthase, beta chain, conserved site
	UM591_11057	63.3676	PHI:2544#PAB1#Q4WK03#Lethal#Aspergillus fumigatus#Invasive pulmonary aspergillosis									hypothetical protein	Polyadenylate-binding protein, cytoplasmic and nuclear	IPR000504|IPR002004|IPR003954|IPR006515|IPR012677	Nucleotide-binding, alpha-beta plait|Polyadenylate binding protein, human types 1, 2, 3, 4|Polyadenylate-binding protein/Hyperplastic disc protein|RNA recognition motif domain|RNA recognition motif domain, eukaryote
	UM591_11441	82.7465	PHI:2540#IPP1#Q4WX65#Lethal#Aspergillus fumigatus#Invasive pulmonary aspergillosis									inorganic pyrophosphatase	Inorganic pyrophosphatase	IPR008162	Inorganic pyrophosphatase
	UM591_11724	52.0918	PHI:2552#NOP4#Q4WNM3#Lethal#Aspergillus fumigatus#Invasive pulmonary aspergillosis									-	-	IPR000504|IPR012677	Nucleotide-binding, alpha-beta plait|RNA recognition motif domain
	UM591_11950	79.1444	PHI:317#RHBA#AAN17787#Reduced virulence#Aspergillus fumigatus#Aspergillosis#Mouse									rheb small monomeric GTPase RhbA	GTP-binding protein rhb1	IPR001806|IPR003578|IPR003579|IPR005225|IPR020849|IPR027417	P-loop containing nucleoside triphosphate hydrolase|Small GTP-binding protein domain|Small GTPase superfamily|Small GTPase superfamily, Rab type|Small GTPase superfamily, Ras type|Small GTPase superfamily, Rho type
	UM591_12379	64.3443	PHI:2516#HIS3#Q4WDG8#Lethal#Aspergillus fumigatus#Invasive pulmonary aspergillosis									hypothetical protein	Imidazoleglycerol-phosphate dehydratase	IPR000807|IPR020565|IPR020568	Imidazoleglycerol-phosphate dehydratase|Imidazoleglycerol-phosphate dehydratase, conserved site|Ribosomal protein S5 domain 2-type fold
	UM591_12458	55.7621	PHI:2531#PRI1#Q4WXC5#Lethal#Aspergillus fumigatus#Invasive pulmonary aspergillosis									hypothetical protein	DNA primase small subunit	IPR002755|IPR014052	DNA primase, small subunit|DNA primase, small subunit, eukaryotic/archaeal
	UM591_12469	63.6066	PHI:2292#aoxA#AFUB_022090#Unaffected pathogenicity#Aspergillus fumigatus#Aspergillosis#Mouse									hypothetical protein	Alternative oxidase, mitochondrial	IPR002680	Alternative oxidase
	UM591_12608	54.0984	PHI:486#SIDA#AAX40989#Loss of pathogenicity#Aspergillus fumigatus#Aspergillosis#Mouse									hypothetical protein	-	IPR013027|IPR025700	FAD-dependent pyridine nucleotide-disulphide oxidoreductase|L-lysine 6-monooxygenase/L-ornithine 5-monooxygenase
	UM591_12790	92.4444	PHI:2530#TUB1#Q4WKG5#Lethal#Aspergillus fumigatus#Invasive pulmonary aspergillosis									hypothetical protein	Tubulin alpha chain	IPR000217|IPR002452|IPR003008|IPR008280|IPR017975|IPR018316|IPR023123	Alpha tubulin|Tubulin|Tubulin, C-terminal|Tubulin, conserved site|Tubulin/FtsZ, 2-layer sandwich domain|Tubulin/FtsZ, C-terminal|Tubulin/FtsZ, GTPase domain
	UM591_12910	69.5175	PHI:2515#ALG7#Q4X146#Lethal#Aspergillus fumigatus#Invasive pulmonary aspergillosis									hypothetical protein	UDP-N-acetylglucosamine--dolichyl-phosphate N-acetylglucosaminephosphotransferase	IPR000715	Glycosyl transferase, family 4
	UM591_13291	52.5532	PHI:2542#ERG12#Q4WP25#Lethal#Aspergillus fumigatus#Invasive pulmonary aspergillosis									GHMP kinase ATP-binding conserved site	-	IPR006203|IPR006204|IPR006205|IPR006206|IPR013750|IPR014721|IPR020568	GHMP kinase N-terminal domain|GHMP kinase, ATP-binding, conserved site|GHMP kinase, C-terminal domain|Mevalonate kinase|Mevalonate/galactokinase|Ribosomal protein S5 domain 2-type fold|Ribosomal protein S5 domain 2-type fold, subgroup
Phaeohyphomycosis	UM591_6638	64.9419	PHI:236#WdCHS2#AAC34496#Reduced virulence#Exophiala dermatitidis (related: Wangiella dermatitidis)#Phaeohyphomycosis#Mouse	GT2.hmm								hypothetical protein	Chitin synthase A	IPR004834|IPR004835|IPR013616	Chitin synthase|Chitin synthase N-terminal|Fungal chitin synthase
	UM591_8719	64.7558	PHI:390#WdCHS5#AAL79830#Reduced virulence#Exophiala dermatitidis (related: Wangiella dermatitidis)#Phaeohyphomycosis#Mouse	GT2.hmm								hypothetical protein	-	IPR001199|IPR001609|IPR004835|IPR009057|IPR014876|IPR027417|IPR029044	Chitin synthase|Cytochrome b5-like heme/steroid binding domain|DEK, C-terminal|Homeodomain-like|Myosin head, motor domain|Nucleotide-diphospho-sugar transferases|P-loop containing nucleoside triphosphate hydrolase
Cryptococcosis	UM591_85	59.9282	PHI:194#URE1#AAC62257#Reduced virulence#Cryptococcus neoformans#Cryptococcosis#Mouse									hypothetical protein	Urease	IPR002019|IPR002026|IPR005848|IPR006680|IPR008221|IPR011059|IPR011612|IPR017950|IPR017951	Amidohydrolase 1|Metal-dependent hydrolase, composite domain|Urease|Urease alpha-subunit, N-terminal|Urease, alpha subunit|Urease, alpha subunit, C-terminal|Urease, alpha subunit, conserved site|Urease, beta subunit|Urease, gamma/gamma-beta subunit
	UM591_216	58.6455	PHI:358#ILV2#AAR29084#Loss of pathogenicity#Cryptococcus neoformans#Cryptococcosis#Mouse									hypothetical protein	Acetolactate synthase catalytic subunit, mitochondrial	IPR000399|IPR011766|IPR012000|IPR012001|IPR012846|IPR029035|IPR029061	Acetolactate synthase, large subunit, biosynthetic|DHS-like NAD/FAD-binding domain|TPP-binding enzyme, conserved site|Thiamin diphosphate-binding fold|Thiamine pyrophosphate enzyme, C-terminal TPP-binding|Thiamine pyrophosphate enzyme, N-terminal TPP-binding domain|Thiamine pyrophosphate enzyme, central domain
	UM591_1115	53.9157	PHI:280#CCN1#AAG36938#Reduced virulence#Cryptococcus neoformans#Cryptococcosis#Mouse									hypothetical protein	Pre-mRNA-splicing factor clf1	IPR003107|IPR011990|IPR013026	RNA-processing protein, HAT helix|Tetratricopeptide repeat-containing domain|Tetratricopeptide-like helical
	UM591_3889	53.2995	PHI:410#SOD2#AAW56834#Loss of pathogenicity#Cryptococcus neoformans#Cryptococcosis#Mouse		extr							-	Superoxide dismutase [Mn], mitochondrial	IPR001189|IPR019831|IPR019832|IPR019833	Manganese/iron superoxide dismutase|Manganese/iron superoxide dismutase, C-terminal|Manganese/iron superoxide dismutase, N-terminal|Manganese/iron superoxide dismutase, binding site
	UM591_5514	66.4372	PHI:265#MET3#AAL92174#Loss of pathogenicity#Cryptococcus neoformans#Cryptococcosis#Mouse									sulfate adenylyltransferase	Sulfate adenylyltransferase	IPR002650|IPR002891|IPR014729|IPR015947|IPR024951|IPR025980|IPR027417|IPR027535	ATP-sulfurylase PUA-like domain|Adenylylsulphate kinase|P-loop containing nucleoside triphosphate hydrolase|PUA-like domain|Rossmann-like alpha/beta/alpha sandwich fold|Sulfate adenylyltransferase|Sulphate adenylyltransferase|Sulphate adenylyltransferase catalytic domain
	UM591_6401	64.4737	PHI:213#CPA1#AAF69795#Reduced virulence#Cryptococcus neoformans#Cryptococcosis#Rabbit									hypothetical protein	Peptidyl-prolyl cis-trans isomerase D	IPR002130|IPR011990|IPR013026|IPR013105|IPR019734|IPR020892|IPR029000	Cyclophilin-like domain|Cyclophilin-type peptidyl-prolyl cis-trans isomerase domain|Cyclophilin-type peptidyl-prolyl cis-trans isomerase, conserved site|Tetratricopeptide TPR2|Tetratricopeptide repeat|Tetratricopeptide repeat-containing domain|Tetratricopeptide-like helical
	UM591_8108	63.75	PHI:213#CPA1#AAF69795#Reduced virulence#Cryptococcus neoformans#Cryptococcosis#Rabbit		extr							hypothetical protein	Peptidyl-prolyl cis-trans isomerase B	IPR002130|IPR020892|IPR029000	Cyclophilin-like domain|Cyclophilin-type peptidyl-prolyl cis-trans isomerase domain|Cyclophilin-type peptidyl-prolyl cis-trans isomerase, conserved site
	UM591_8194	50	PHI:213#CPA1#AAF69795#Reduced virulence#Cryptococcus neoformans#Cryptococcosis#Rabbit									hypothetical protein	Peptidyl-prolyl cis-trans isomerase cyp15	IPR001680|IPR002130|IPR015943|IPR017986|IPR029000	Cyclophilin-like domain|Cyclophilin-type peptidyl-prolyl cis-trans isomerase domain|WD40 repeat|WD40-repeat-containing domain|WD40/YVTN repeat-like-containing domain
	UM591_8602	70.4762	PHI:182#RAS1#AAD55937#Reduced virulence#Cryptococcus neoformans#Cryptococcosis#Drosophila melanogaster									hypothetical protein	Ras-like protein	IPR001806|IPR003578|IPR003579|IPR005225|IPR020849|IPR027417	P-loop containing nucleoside triphosphate hydrolase|Small GTP-binding protein domain|Small GTPase superfamily|Small GTPase superfamily, Rab type|Small GTPase superfamily, Ras type|Small GTPase superfamily, Rho type
	UM591_11231	64.7834	PHI:424#PCK1#EAL19243#Reduced virulence#Cryptococcus neoformans#Cryptococcosis#Mouse									Phosphoenolpyruvate carboxykinase	Phosphoenolpyruvate carboxykinase [ATP]	IPR001272|IPR008210|IPR013035|IPR015994	Phosphoenolpyruvate carboxykinase (ATP), conserved site|Phosphoenolpyruvate carboxykinase, ATP-utilising|Phosphoenolpyruvate carboxykinase, C-terminal|Phosphoenolpyruvate carboxykinase, N-terminal
	UM591_11396	55.9524	PHI:213#CPA1#AAF69795#Reduced virulence#Cryptococcus neoformans#Cryptococcosis#Rabbit									hypothetical protein	Peptidyl-prolyl cis-trans isomerase H	IPR002130|IPR020892|IPR024936|IPR029000	Cyclophilin-like domain|Cyclophilin-type peptidyl-prolyl cis-trans isomerase|Cyclophilin-type peptidyl-prolyl cis-trans isomerase domain|Cyclophilin-type peptidyl-prolyl cis-trans isomerase, conserved site
	UM591_11813	52.0861	PHI:286#CLC-A#AAO73005#Reduced virulence#Cryptococcus neoformans#Cryptococcosis#Mouse									hypothetical protein	-	IPR000644|IPR001807|IPR014743	CBS domain|Chloride channel, core|Chloride channel, voltage gated
	UM591_12045	53.8889	PHI:386#TSA1#AAP68994#Reduced virulence#Cryptococcus neoformans#Cryptococcosis#Mouse									hypothetical protein	Peroxiredoxin TSA1	IPR000866|IPR012336|IPR019479|IPR024706	Alkyl hydroperoxide reductase subunit C /Thiol specific antioxidant|Peroxiredoxin, AhpC-type|Peroxiredoxin, C-terminal|Thioredoxin-like fold
	UM591_12228	72.1622	PHI:668#GNO1#AAP41027#Unaffected pathogenicity#Cryptococcus neoformans#Cryptococcosis#Mouse									S-nitrosoglutathione reductase	S-(hydroxymethyl)glutathione dehydrogenase	IPR002085|IPR002328|IPR011032|IPR013149|IPR013154|IPR014183|IPR016040|IPR020843	Alcohol dehydrogenase GroES-like|Alcohol dehydrogenase class III/S-(hydroxymethyl)glutathione dehydrogenase|Alcohol dehydrogenase superfamily, zinc-type|Alcohol dehydrogenase, C-terminal|Alcohol dehydrogenase, zinc-type, conserved site|GroES (chaperonin 10)-like|NAD(P)-binding domain|Polyketide synthase, enoylreductase
Candidiasis	UM591_7165	50.0659	PHI:454#PMT2#EAL01044#Reduced virulence#Candida albicans#Candidiasis#Mouse	GT39.hmm								similar to dolichyl phosphate-D-mannose:protein O-D-mannosyltransferase	Dolichyl-phosphate-mannose--protein mannosyltransferase 2	IPR003342|IPR016093|IPR027005	Glycosyl transferase, family 39|Glycosyltransferase 39 like|MIR motif
	UM591_8513	52.9002	PHI:104#CaMNT1#CAA67930#Reduced virulence#Candida albicans#Candidiasis#Guinea pig	GT15.hmm	golg							glycosyltransferase family 15 protein	Alpha-1,2 mannosyltransferase KTR1	IPR002685|IPR029044	Glycosyl transferase, family 15|Nucleotide-diphospho-sugar transferases
	UM591_11435	55.4694	PHI:31#CHS3#BAA02707#Reduced virulence#Candida albicans#Candidiasis#Mouse	GT2.hmm								hypothetical protein	Chitin synthase 4	IPR001199|IPR004835|IPR029044	Chitin synthase|Cytochrome b5-like heme/steroid binding domain|Nucleotide-diphospho-sugar transferases
	UM591_224	60.8696	PHI:270#RHO1#BAA24262#Loss of pathogenicity#Candida albicans#Candidiasis#Mouse									Ras GTPase	GTP-binding protein rho2	IPR001806|IPR003578|IPR003579|IPR005225|IPR020849|IPR027417	P-loop containing nucleoside triphosphate hydrolase|Small GTP-binding protein domain|Small GTPase superfamily|Small GTPase superfamily, Rab type|Small GTPase superfamily, Ras type|Small GTPase superfamily, Rho type
	UM591_318	53.012	PHI:2570#CYB2#Q6FM61#Reduced virulence#Candida glabrata#Candidiasis#Mouse									putative mitochondrial cytochrome protein	Cytochrome b2, mitochondrial	IPR000262|IPR001199|IPR008259|IPR012133|IPR013785|IPR018506	Aldolase-type TIM barrel|Alpha-hydroxy acid dehydrogenase, FMN-dependent|Cytochrome b5, heme-binding site|Cytochrome b5-like heme/steroid binding domain|FMN-dependent alpha-hydroxy acid dehydrogenase, active site|FMN-dependent dehydrogenase
	UM591_325	51.0204	PHI:206#CaNAG1#BAB43821#Reduced virulence#Candida albicans#Candidiasis#Mouse									hypothetical protein	Glucosamine-6-phosphate isomerase 1	IPR004547|IPR006148|IPR018321	Glucosamine-6-phosphate isomerase|Glucosamine-6-phosphate isomerase, conserved site|Glucosamine/galactosamine-6-phosphate isomerase
	UM591_669	63.9958	PHI:96#FAS2#AAA34345#Loss of pathogenicity#Candida albicans#Candidiasis#Mouse									hypothetical protein	Fatty acid synthase subunit alpha	IPR001227|IPR002582|IPR004568|IPR008278|IPR014030|IPR014031|IPR016035|IPR016038|IPR016039|IPR016040|IPR018201|IPR026025	4'-phosphopantetheinyl transferase superfamily|Acyl transferase domain|Acyl transferase/acyl hydrolase/lysophospholipase|Beta-ketoacyl synthase, C-terminal|Beta-ketoacyl synthase, N-terminal|Beta-ketoacyl synthase, active site|Fatty acid synthase alpha subunit, yeast|Holo-[acyl carrier protein] synthase|NAD(P)-binding domain|Phosphopantethiene-protein transferase domain|Thiolase-like|Thiolase-lik…
	UM591_1428	76.0504	PHI:378#SIT4#EAK91146#Reduced virulence#Candida albicans#Candidiasis#Mouse									hypothetical protein	Serine/threonine-protein phosphatase ppe1	IPR004843|IPR006186|IPR029052	Calcineurin-like phosphoesterase domain, apaH type|Metallo-dependent phosphatase-like|Serine/threonine-specific protein phosphatase/bis(5-nucleosyl)-tetraphosphatase
	UM591_3079	53.5604	PHI:485#FTR1#AAF69680#Loss of pathogenicity#Candida albicans#Candidiasis#Mouse									similar to plasma membrane iron permease	Plasma membrane iron permease	IPR004923	Iron permease FTR1
	UM591_4316	50.6944	PHI:174#GNA1#BAA36496#Reduced virulence#Candida albicans#Candidiasis#Mouse									similar to glucosamine 6-phosphate N-acetyltransferase	Glucosamine 6-phosphate N-acetyltransferase	IPR000182|IPR016181	Acyl-CoA N-acyltransferase|GNAT domain
	UM591_4478	59.0164	PHI:435#VMA7#EAL02110#Loss of pathogenicity#Candida albicans#Candidiasis#Mouse									hypothetical protein	V-type proton ATPase subunit F	IPR005772|IPR008218	ATPase, V1 complex, subunit F|ATPase, V1 complex, subunit F, eukaryotic
	UM591_5286	54.0952	PHI:2558#DUR31#Q59P00#Reduced virulence#Candida albicans#Candidiasis#Mouse									hypothetical protein	-	IPR001734	Sodium/solute symporter
	UM591_5721	61.5132	PHI:281#CDC10#CAA81090#Reduced virulence#Candida albicans#Candidiasis#Mouse									septin like spn2	Septin homolog spn2	IPR000038|IPR016491|IPR027417	Cell division protein GTP binding|P-loop containing nucleoside triphosphate hydrolase|Septin
	UM591_5798	81.4607	PHI:270#RHO1#BAA24262#Loss of pathogenicity#Candida albicans#Candidiasis#Mouse									hypothetical protein	GTP-binding protein rhoA	IPR001806|IPR003578|IPR003579|IPR005225|IPR020849|IPR027417	P-loop containing nucleoside triphosphate hydrolase|Small GTP-binding protein domain|Small GTPase superfamily|Small GTPase superfamily, Rab type|Small GTPase superfamily, Ras type|Small GTPase superfamily, Rho type
	UM591_6338	51.0373	PHI:106#CAT1#AAC39448#Reduced virulence#Candida albicans#Candidiasis#Mouse									Catalase	Catalase	IPR002226|IPR010582|IPR011614|IPR018028|IPR020835|IPR024708|IPR024711	Catalase active site|Catalase core domain|Catalase haem-binding site|Catalase immune-responsive domain|Catalase, mono-functional, haem-containing|Catalase, mono-functional, haem-containing, clades 1 and 3|Catalase-like domain
	UM591_7362	66.287	PHI:2553#VPS4#Q5AG40#Loss of pathogenicity#Candida albicans#Candidiasis#Mouse									hypothetical protein	Vacuolar protein sorting-associated protein 4	IPR003593|IPR003959|IPR003960|IPR007330|IPR015415|IPR027417	AAA+ ATPase domain|ATPase, AAA-type, conserved site|ATPase, AAA-type, core|MIT|P-loop containing nucleoside triphosphate hydrolase|Vps4 oligomerisation, C-terminal
	UM591_9784	58.0508	PHI:510#CaNAG3#EAK93097#Reduced virulence#Candida albicans#Candidiasis#Mouse									Major facilitator superfamily	-	IPR011701|IPR016196|IPR020846	Major facilitator superfamily|Major facilitator superfamily domain|Major facilitator superfamily domain, general substrate transporter
	UM591_9825	53.6028	PHI:196#ADE2#AAC49755#Reduced virulence#Candida albicans#Candidiasis#Mouse									hypothetical protein	Phosphoribosylaminoimidazole carboxylase	IPR000031|IPR003135|IPR005875|IPR011054|IPR011761|IPR013815|IPR013816|IPR016185|IPR016301	ATP-grasp fold|ATP-grasp fold, ATP-dependent carboxylate-amine ligase-type|ATP-grasp fold, subdomain 1|ATP-grasp fold, subdomain 2|Phosphoribosylaminoimidazole carboxylase|Phosphoribosylaminoimidazole carboxylase PurE domain|Phosphoribosylaminoimidazole carboxylase, ATPase subunit|Pre-ATP-grasp domain|Rudiment single hybrid motif
	UM591_11222	50.2165	PHI:401#SOD2#AAB86583#Unaffected pathogenicity#Candida albicans#Candidiasis#Mouse									hypothetical protein	Superoxide dismutase [Mn], mitochondrial	IPR001189|IPR019831|IPR019832|IPR019833	Manganese/iron superoxide dismutase|Manganese/iron superoxide dismutase, C-terminal|Manganese/iron superoxide dismutase, N-terminal|Manganese/iron superoxide dismutase, binding site
	UM591_11636	55.8659	PHI:270#RHO1#BAA24262#Loss of pathogenicity#Candida albicans#Candidiasis#Mouse									hypothetical protein	GTP-binding protein rhoC	IPR001806|IPR002041|IPR003578|IPR003579|IPR005225|IPR020849|IPR027417	P-loop containing nucleoside triphosphate hydrolase|Ran GTPase|Small GTP-binding protein domain|Small GTPase superfamily|Small GTPase superfamily, Rab type|Small GTPase superfamily, Ras type|Small GTPase superfamily, Rho type
	UM591_12585	51.9608	PHI:440#PMR1#CAB87245#Reduced virulence#Candida albicans#Candidiasis#Mouse									hypothetical protein	Calcium-transporting ATPase 1	IPR001757|IPR004014|IPR006068|IPR008250|IPR018303|IPR023214|IPR023298|IPR023299	Cation-transporting P-type ATPase|Cation-transporting P-type ATPase, C-terminal|Cation-transporting P-type ATPase, N-terminal|HAD-like domain|P-type ATPase, transmembrane domain|P-type ATPase, A domain|P-type ATPase, cytoplasmic domain N|P-type ATPase, phosphorylation site
Dermatophytosis	UM591_2816	61.3108	PHI:825#SE#AAQ18216#Resistant to chemical#Trichophyton rubrum#Dermatophytosis#Human									hypothetical protein	-	IPR003042|IPR006076|IPR013698	Aromatic-ring hydroxylase-like|FAD dependent oxidoreductase|Squalene epoxidase
Meningoencehalitis	UM591_1832	63.2727	PHI:2474#imd1#E3P6S0#Reduced virulence#Cryptococcus neoformans#Meningoencephalitis#Mouse									similar to inosine-5'-monophosphate dehydrogenase	Inosine-5'-monophosphate dehydrogenase	IPR000644|IPR001093|IPR005990|IPR013785|IPR015875	Aldolase-type TIM barrel|CBS domain|IMP dehydrogenase /GMP reductase, conserved site|IMP dehydrogenase/GMP reductase|Inosine-5'-monophosphate dehydrogenase
Fusarium blight	UM591_6	51.3711	PHI:1709#GzZC024#I1RR13#Unaffected pathogenicity#Gibberella zeae (related: Fusarium graminearum)#Fusarium ear blight#Wheat									-	-	IPR001138|IPR007219	Transcription factor domain, fungi|Zn(2)-C6 fungal-type DNA-binding domain
	UM591_182	58.1871	PHI:1366#GzCON7#I1RJV1#Reduced virulence#Gibberella zeae (related: Fusarium graminearum)#Fusarium ear blight#Wheat									hypothetical protein	-	IPR007087|IPR013087	Zinc finger C2H2-type/integrase DNA-binding domain|Zinc finger, C2H2
	UM591_301	74.0181	PHI:2353#AMT1#XP_381310#Reduced virulence#Gibberella zeae (related: Fusarium graminearum)#Fusarium head blight#Wheat									hypothetical protein	Probable protein arginine N-methyltransferase	IPR025714|IPR025799|IPR029063	Methyltransferase domain|Protein arginine N-methyltransferase|S-adenosyl-L-methionine-dependent methyltransferase-like
	UM591_337	66.9118	PHI:1467#GzCCAAT007#I1RXZ0#Unaffected pathogenicity#Gibberella zeae (related: Fusarium graminearum)#Fusarium ear blight#Wheat									hypothetical protein	Negative cofactor 2 complex subunit beta	IPR003958|IPR009072	Histone-fold|Transcription factor CBF/NF-Y/archaeal histone
	UM591_346	50.1852	PHI:716#ZEB1#ABB90284#Unaffected pathogenicity#Gibberella zeae (related: Fusarium graminearum)#Fusarium ear blight#Barley	AA7.hmm	extr							FAD binding domain protein	-	IPR006094|IPR012951|IPR016166	Berberine/berberine-like|FAD linked oxidase, N-terminal|FAD-binding, type 2
	UM591_388	62.0253	PHI:1564#GzOB004#Q4IPZ1#Unaffected pathogenicity#Gibberella zeae (related: Fusarium graminearum)#Fusarium ear blight#Wheat									hypothetical protein	Mitochondrial import inner membrane translocase subunit tim10	IPR004217|IPR027100|IPR027247	Mitochondrial import inner membrane translocase subunit Tim10|Mitochondrial import inner membrane translocase subunit Tim10/Tim12|Tim10/DDP family zinc finger
	UM591_411	59.1892	PHI:1443#GzGATA001#I1RB11#Unaffected pathogenicity#Gibberella zeae (related: Fusarium graminearum)#Fusarium ear blight#Wheat									white collar-2	Cutinase gene palindrome-binding protein	IPR000014|IPR000679|IPR013088|IPR013655	PAS domain|PAS fold-3|Zinc finger, GATA-type|Zinc finger, NHR/GATA-type
	UM591_443	61.4919	PHI:1241#FGSG_07816#I1RAE2#Unaffected pathogenicity#Gibberella zeae (related: Fusarium graminearum)#Fusarium ear blight#Wheat									similar to serine/threonine-protein kinase psk1	Serine/threonine-protein kinase psk1	IPR000719|IPR000961|IPR002290|IPR008271|IPR011009	AGC-kinase, C-terminal|Protein kinase domain|Protein kinase-like domain|Serine/threonine- /dual specificity protein kinase, catalytic domain|Serine/threonine-protein kinase, active site
	UM591_525	53.726	PHI:1753#GzZC068#I1RZN4#Unaffected pathogenicity#Gibberella zeae (related: Fusarium graminearum)#Fusarium ear blight#Wheat									similar to C6 transcription factor	-	IPR001138|IPR007219	Transcription factor domain, fungi|Zn(2)-C6 fungal-type DNA-binding domain
	UM591_594	59.7302	PHI:1234#FGSG_07812#I1RV69#Lethal#Gibberella zeae (related: Fusarium graminearum)#Fusarium ear blight#Wheat									hypothetical protein	Phosphatidylinositol 3-kinase tor2	IPR000403|IPR003151|IPR003152|IPR009076|IPR011009|IPR011989|IPR011990|IPR014009|IPR016024|IPR018936|IPR021133|IPR024585	Armadillo-like helical|Armadillo-type fold|Domain of unknown function DUF3385, target of rapamycin protein|HEAT, type 2|PIK-related kinase|PIK-related kinase, FAT|PIK-related kinase, FATC|Phosphatidylinositol 3-/4-kinase, catalytic domain|Phosphatidylinositol 3/4-kinase, conserved site|Protein kinase-like domain|Rapamycin-binding domain|Tetratricopeptide-like helical
	UM591_672	53.0508	PHI:1774#GzZC089#I1S3Z9#Lethal#Gibberella zeae (related: Fusarium graminearum)#Fusarium ear blight#Wheat									hypothetical protein	-	IPR001138|IPR007219	Transcription factor domain, fungi|Zn(2)-C6 fungal-type DNA-binding domain
	UM591_763	56.5107	PHI:1958#GzZC273#I1RMD1#Unaffected pathogenicity#Gibberella zeae (related: Fusarium graminearum)#Fusarium ear blight#Wheat									hypothetical protein	Positive regulator of purine utilization	IPR001138|IPR007219	Transcription factor domain, fungi|Zn(2)-C6 fungal-type DNA-binding domain
	UM591_842	70.2034	PHI:1552#GzMyb016#I1S0N5#Unaffected pathogenicity#Gibberella zeae (related: Fusarium graminearum)#Fusarium ear blight#Wheat									hypothetical protein	ISWI chromatin-remodeling complex ATPase ISW2	IPR000330|IPR001005|IPR001650|IPR009057|IPR014001|IPR015194|IPR015195|IPR017884|IPR027417	Helicase, C-terminal|Helicase, superfamily 1/2, ATP-binding domain|Homeodomain-like|ISWI HAND domain|P-loop containing nucleoside triphosphate hydrolase|SANT domain|SANT/Myb domain|SLIDE domain|SNF2-related
	UM591_917	50.9341	PHI:1671#GzCCHC011#Q4HWE2#Reduced virulence#Gibberella zeae (related: Fusarium graminearum)#Fusarium ear blight#Wheat									hypothetical protein	5'-3' exoribonuclease 2	IPR001878|IPR004859|IPR017151|IPR027073	5'-3' exoribonuclease|5'-3' exoribonuclease 2|Putative 5-3 exonuclease|Zinc finger, CCHC-type
	UM591_1025	51.2586	PHI:1080#Cch1#I1RCP1#Unaffected pathogenicity#Gibberella zeae (related: Fusarium graminearum)#Fusarium ear blight#Wheat									calcium-channel protein CCH1	-	IPR002048|IPR005821|IPR011992|IPR027359	EF-hand domain|EF-hand domain pair|Ion transport domain|Voltage-dependent channel, four helix bundle domain
	UM591_1049	73.1392	PHI:1177#Sc Fpk1 homolog#I1RKH9#Reduced virulence#Gibberella zeae (related: Fusarium graminearum)#Fusarium ear blight#Wheat									hypothetical protein	Serine/threonine-protein kinase nrc-2	IPR000719|IPR002290|IPR008271|IPR011009	Protein kinase domain|Protein kinase-like domain|Serine/threonine- /dual specificity protein kinase, catalytic domain|Serine/threonine-protein kinase, active site
	UM591_1072	56.7807	PHI:1551#GzMyb015#I1RZG7#Unaffected pathogenicity#Gibberella zeae (related: Fusarium graminearum)#Fusarium ear blight#Wheat									hypothetical protein	Pre-mRNA-splicing factor cef1	IPR001005|IPR009057|IPR017930|IPR021786	Domain of unknown function DUF3351|Homeodomain-like|Myb domain|SANT/Myb domain
	UM591_1081	62.5616	PHI:1237#FGSG_01058#I1RZ37#Lethal#Gibberella zeae (related: Fusarium graminearum)#Fusarium ear blight#Wheat									calcium-independent protein kinase C	Protein kinase C-like	IPR000008|IPR000719|IPR000961|IPR002219|IPR002290|IPR008271|IPR011009|IPR011072|IPR017441|IPR017892	AGC-kinase, C-terminal|C2 domain|HR1 rho-binding repeat|Protein kinase C-like, phorbol ester/diacylglycerol binding|Protein kinase domain|Protein kinase, ATP binding site|Protein kinase, C-terminal|Protein kinase-like domain|Serine/threonine- /dual specificity protein kinase, catalytic domain|Serine/threonine-protein kinase, active site
	UM591_1128	56.3008	PHI:1246#FGSG_05549#I1RYQ5#Unaffected pathogenicity#Gibberella zeae (related: Fusarium graminearum)#Fusarium ear blight#Wheat									hypothetical protein	-	IPR000719|IPR002290|IPR011009|IPR011989|IPR016024	Armadillo-like helical|Armadillo-type fold|Protein kinase domain|Protein kinase-like domain|Serine/threonine- /dual specificity protein kinase, catalytic domain
	UM591_1143	50.6211	PHI:2419#CID1#I1RKF3#Reduced virulence#Gibberella zeae (related: Fusarium graminearum)#Fusarium head blight#Wheat									similar to cyclin-C	RNA polymerase II holoenzyme cyclin-like subunit	IPR006671|IPR013763|IPR015429|IPR023598|IPR028367	Cyclin C|Cyclin C/H/T/L|Cyclin, N-terminal|Cyclin-like|RNA polymerase II holoenzyme, cyclin-like subunit Ssn8, fungi
	UM591_1244	58.3772	PHI:1207#Sc Kin1/Kin2 homolog#I1RY42#Reduced virulence#Gibberella zeae (related: Fusarium graminearum)#Fusarium ear blight#Wheat									similar to serine/threonine protein kinase Kin1	-	IPR000719|IPR001772|IPR002290|IPR007216|IPR008271|IPR011009|IPR016024|IPR017441|IPR028375	Armadillo-type fold|KA1 domain/Ssp2 C-terminal domain|Kinase associated domain 1 (KA1)|Protein kinase domain|Protein kinase, ATP binding site|Protein kinase-like domain|Rcd1|Serine/threonine- /dual specificity protein kinase, catalytic domain|Serine/threonine-protein kinase, active site
	UM591_1417	69.0096	PHI:1659#GzCCCH003#I1S245#Unaffected pathogenicity#Gibberella zeae (related: Fusarium graminearum)#Fusarium ear blight#Wheat									hypothetical protein	Translation machinery-associated protein 46	IPR000571	Zinc finger, CCCH-type
	UM591_1418	82.1946	PHI:2387#ACL2#I1RPR1#Loss of pathogenicity#Gibberella zeae (related: Fusarium graminearum)#Fusarium head blight#Wheat									hypothetical protein	Probable ATP-citrate synthase subunit 2	IPR013650|IPR013816|IPR016102	ATP-grasp fold, subdomain 2|ATP-grasp fold, succinyl-CoA synthetase-type|Succinyl-CoA synthetase-like
	UM591_1419	88.0488	PHI:2386#ACL1#I1S7N4#Loss of pathogenicity#Gibberella zeae (related: Fusarium graminearum)#Fusarium head blight#Wheat									similar to ATP-citrate synthase subunit 1	Probable ATP-citrate synthase subunit 1	IPR002020|IPR003781|IPR005810|IPR005811|IPR016040|IPR016102|IPR016141|IPR016142|IPR016143|IPR017440|IPR017866	ATP-citrate lyase/succinyl-CoA ligase|ATP-citrate lyase/succinyl-CoA ligase, active site|Citrate synthase-like|Citrate synthase-like, core|Citrate synthase-like, large alpha subdomain|Citrate synthase-like, small alpha subdomain|CoA-binding|NAD(P)-binding domain|Succinyl-CoA ligase, alpha subunit|Succinyl-CoA synthetase, beta subunit, conserved site|Succinyl-CoA synthetase-like
	UM591_1442	67.8344	PHI:1569#GzOB009#I1RCH5#Lethal#Gibberella zeae (related: Fusarium graminearum)#Fusarium ear blight#Wheat									hypothetical protein	54S ribosomal protein RML2, mitochondrial	IPR002171|IPR005880|IPR008991|IPR012340|IPR014722|IPR014726|IPR022666|IPR022669|IPR022671	Nucleic acid-binding, OB-fold|Ribosomal Proteins L2, RNA binding domain|Ribosomal protein L2|Ribosomal protein L2 domain 2|Ribosomal protein L2, C-terminal|Ribosomal protein L2, bacterial/organellar-type|Ribosomal protein L2, conserved site|Ribosomal protein L2, domain 3|Translation protein SH3-like domain
	UM591_1451	62.8057	PHI:1267#FGSG_05586#I1RKK7#Unaffected pathogenicity#Gibberella zeae (related: Fusarium graminearum)#Fusarium ear blight#Wheat									hypothetical protein	-	IPR000719|IPR002290|IPR008271|IPR011009|IPR017441	Protein kinase domain|Protein kinase, ATP binding site|Protein kinase-like domain|Serine/threonine- /dual specificity protein kinase, catalytic domain|Serine/threonine-protein kinase, active site
	UM591_1559	63.7363	PHI:1587#GzOB027#I1RSI4#Unaffected pathogenicity#Gibberella zeae (related: Fusarium graminearum)#Fusarium ear blight#Wheat									hypothetical protein	DNA replication licensing factor mcm7	IPR001208|IPR003593|IPR008050|IPR012340|IPR027417|IPR027925	AAA+ ATPase domain|DNA replication licensing factor Mcm7|MCM N-terminal domain|Mini-chromosome maintenance, DNA-dependent ATPase|Nucleic acid-binding, OB-fold|P-loop containing nucleoside triphosphate hydrolase
	UM591_1606	50.3922	PHI:1555#GzMyb019#I1RDG6#Unaffected pathogenicity#Gibberella zeae (related: Fusarium graminearum)#Fusarium ear blight#Wheat									putative phthalate transporter protein	-	IPR011701|IPR016196	Major facilitator superfamily|Major facilitator superfamily domain, general substrate transporter
	UM591_1678	61.9608	PHI:1531#GzSsu72#Q4IPC8#Unaffected pathogenicity#Gibberella zeae (related: Fusarium graminearum)#Fusarium ear blight#Wheat									hypothetical protein	RNA polymerase II subunit A C-terminal domain phosphatase ssu72	IPR006811	RNA polymerase II subunit A
	UM591_1763	51.2821	PHI:1632#GzWing004#I1RBU0#Unaffected pathogenicity#Gibberella zeae (related: Fusarium graminearum)#Fusarium ear blight#Wheat									hypothetical protein	-	IPR011991|IPR015163|IPR016314|IPR027417	CDC6, C-terminal domain|Cell division protein Cdc6/18|P-loop containing nucleoside triphosphate hydrolase|Winged helix-turn-helix DNA-binding domain
	UM591_1877	65.0224	PHI:1249#FGSG_00132#I1RB79#Unaffected pathogenicity#Gibberella zeae (related: Fusarium graminearum)#Fusarium ear blight#Wheat									similar to calcium/calmodulin-dependent protein kinase	Serine/threonine-protein kinase srk1	IPR000719|IPR002290|IPR008271|IPR011009|IPR020636	Calcium/calmodulin-dependent/calcium-dependent protein kinase|Protein kinase domain|Protein kinase-like domain|Serine/threonine- /dual specificity protein kinase, catalytic domain|Serine/threonine-protein kinase, active site
	UM591_1883	57.4074	PHI:1006#HMR1#I1RXX1#Reduced virulence#Gibberella zeae (related: Fusarium graminearum)#Fusarium ear blight#Wheat									hypothetical protein	3-hydroxy-3-methylglutaryl-coenzyme A reductase	IPR000731|IPR002202|IPR004554|IPR009023|IPR009029|IPR023074|IPR023076|IPR023282|IPR025583	HMG-CoA reductase, N-terminal domain|Hydroxymethylglutaryl-CoA reductase, N-terminal|Hydroxymethylglutaryl-CoA reductase, class I/II|Hydroxymethylglutaryl-CoA reductase, class I/II, NAD/NADP-binding|Hydroxymethylglutaryl-CoA reductase, class I/II, catalytic domain|Hydroxymethylglutaryl-CoA reductase, class I/II, conserved site|Hydroxymethylglutaryl-CoA reductase, class I/II, substrate-binding|Hyd…
	UM591_1884	85.9223	PHI:1658#GzCCCH002#I1RRW3#Unaffected pathogenicity#Gibberella zeae (related: Fusarium graminearum)#Fusarium ear blight#Wheat									hypothetical protein	Splicing factor U2AF 23 kDa subunit	IPR000504|IPR000571|IPR003954|IPR009145|IPR012677	Nucleotide-binding, alpha-beta plait|RNA recognition motif domain|RNA recognition motif domain, eukaryote|U2 auxiliary factor small subunit|Zinc finger, CCCH-type
	UM591_1940	52.1327	PHI:1173#HDF1#I1RCN2#Reduced virulence#Gibberella zeae (related: Fusarium graminearum)#Fusarium ear blight#Wheat									hypothetical protein	-	IPR000286|IPR003084|IPR023801	Histone deacetylase|Histone deacetylase domain|Histone deacetylase superfamily
	UM591_2090	77.3134	PHI:1194#Sc Mkk1/Mkk2 homolog#I1RT06#Reduced virulence#Gibberella zeae (related: Fusarium graminearum)#Fusarium ear blight#Wheat									MAP kinase kinase MKK2/SSP33	-	IPR000719|IPR002290|IPR008271|IPR011009|IPR017441	Protein kinase domain|Protein kinase, ATP binding site|Protein kinase-like domain|Serine/threonine- /dual specificity protein kinase, catalytic domain|Serine/threonine-protein kinase, active site
	UM591_2142	52.381	PHI:733#FBP1#I1REK5#Reduced virulence#Gibberella zeae (related: Fusarium graminearum)#Fusarium ear blight#Barley									ubiquitin ligase complex F-box protein GRR1	SCF E3 ubiquitin ligase complex F-box protein grrA	IPR001810|IPR006553|IPR026940	F-box domain|Leucine-rich repeat, cysteine-containing subtype|SCF E3 ubiquitin ligase complex F-box protein GrrA/Grr1
	UM591_2227	54.1843	PHI:1253#FGSG_11614#I1RS57#Unaffected pathogenicity#Gibberella zeae (related: Fusarium graminearum)#Fusarium ear blight#Wheat									hypothetical protein	-	IPR000719|IPR002290|IPR008271|IPR011009	Protein kinase domain|Protein kinase-like domain|Serine/threonine- /dual specificity protein kinase, catalytic domain|Serine/threonine-protein kinase, active site
	UM591_2340	58.5556	PHI:1816#GzZC131#I1RRS3#Unaffected pathogenicity#Gibberella zeae (related: Fusarium graminearum)#Fusarium ear blight#Wheat									hypothetical protein	-	IPR001138|IPR007219	Transcription factor domain, fungi|Zn(2)-C6 fungal-type DNA-binding domain
	UM591_2450	65.4036	PHI:1594#GzOB034#ERROR 42#Unaffected pathogenicity#Gibberella zeae (related: Fusarium graminearum)#Fusarium ear blight#Wheat									hypothetical protein	Lysine--tRNA ligase, cytoplasmic	IPR002313|IPR004364|IPR004365|IPR006195|IPR012340|IPR018149|IPR018150	Aminoacyl-tRNA synthetase, class II|Aminoacyl-tRNA synthetase, class II (D/K/N)|Aminoacyl-tRNA synthetase, class II (D/K/N)-like|Lysine-tRNA ligase, class II|Lysyl-tRNA synthetase, class II, C-terminal|Nucleic acid-binding, OB-fold|OB-fold nucleic acid binding domain, AA-tRNA synthetase-type
	UM591_2769	64.4186	PHI:730#KSA1#I1RSU2#Unaffected pathogenicity#Gibberella zeae (related: Fusarium graminearum)#Fusarium ear blight#Wheat									similar to 3-oxoacyl-(acyl-carrier-protein) synthase	Putative 3-oxoacyl-[acyl-carrier-protein] synthase, mitochondrial	IPR014030|IPR014031|IPR016038|IPR016039|IPR017568|IPR018201|IPR020841	3-oxoacyl-[acyl-carrier-protein] synthase 2|Beta-ketoacyl synthase, C-terminal|Beta-ketoacyl synthase, N-terminal|Beta-ketoacyl synthase, active site|Polyketide synthase, beta-ketoacyl synthase domain|Thiolase-like|Thiolase-like, subgroup
	UM591_2779	54.4741	PHI:1406#GzC2H070#I1RX04#Lethal#Gibberella zeae (related: Fusarium graminearum)#Fusarium ear blight#Wheat									hypothetical protein	-	IPR002110|IPR007087|IPR020683	Ankyrin repeat|Ankyrin repeat-containing domain|Zinc finger, C2H2
	UM591_2857	57.7626	PHI:1287#FGSG_13944#I1RT82#Unaffected pathogenicity#Gibberella zeae (related: Fusarium graminearum)#Fusarium ear blight#Wheat									hypothetical protein	-	IPR003594|IPR018955	Branched-chain alpha-ketoacid dehydrogenase kinase/Pyruvate dehydrogenase kinase, N-terminal|Histidine kinase-like ATPase, ATP-binding domain
	UM591_2897	70.7586	PHI:1583#GzOB023#ERROR 42#Unaffected pathogenicity#Gibberella zeae (related: Fusarium graminearum)#Fusarium ear blight#Wheat									hypothetical protein	DNA replication licensing factor mcm5	IPR001208|IPR008048|IPR012340|IPR018525|IPR027417|IPR027925	DNA replication licensing factor Mcm|MCM N-terminal domain|Mini-chromosome maintenance, DNA-dependent ATPase|Mini-chromosome maintenance, conserved site|Nucleic acid-binding, OB-fold|P-loop containing nucleoside triphosphate hydrolase
	UM591_3041	55.7093	PHI:2451#FAEB1#I1S3N8#Unaffected pathogenicity#Gibberella zeae (related: Fusarium graminearum)#Fusarium head blight#Wheat	CE1.hmm	extr							carbohydrate esterase family 1 protein	-	IPR010126|IPR029058	Alpha/Beta hydrolase fold|Esterase, PHB depolymerase
	UM591_3080	60.5585	PHI:1011#FET3#I1RMG9#Unaffected pathogenicity#Gibberella zeae (related: Fusarium graminearum)#Fusarium ear blight#Wheat	AA1.hmm								similar to iron transport multicopper oxidase FET3	Iron transport multicopper oxidase FET3	IPR001117|IPR002355|IPR008972|IPR011706|IPR011707	Cupredoxin|Multicopper oxidase, copper-binding site|Multicopper oxidase, type 1|Multicopper oxidase, type 2|Multicopper oxidase, type 3
	UM591_3284	54.0481	PHI:1622#GzJUM004#I1RRU8#Unaffected pathogenicity#Gibberella zeae (related: Fusarium graminearum)#Fusarium ear blight#Wheat									hypothetical protein	-	IPR001810|IPR003347	F-box domain|JmjC domain
	UM591_3319	74	PHI:1384#GzC2H047#I1RSD5#Reduced virulence#Gibberella zeae (related: Fusarium graminearum)#Fusarium ear blight#Wheat									hypothetical protein	-	IPR007087|IPR013087|IPR015880	Zinc finger C2H2-type/integrase DNA-binding domain|Zinc finger, C2H2|Zinc finger, C2H2-like
	UM591_3361	81.2632	PHI:445#NOS1#I1RA52#Reduced virulence#Gibberella zeae (related: Fusarium graminearum)#Fusarium ear blight#Wheat									hypothetical protein	NADH-ubiquinone oxidoreductase 49 kDa subunit, mitochondrial	IPR001135|IPR014029|IPR022885|IPR029014	NAD(P)H-quinone oxidoreductase subunit D/H|NADH-quinone oxidoreductase, subunit D|NADH:ubiquinone oxidoreductase, 49kDa subunit, conserved site|NiFe hydrogenase-like
	UM591_3365	59.7861	PHI:1291#TOP1#I1RRX4#Reduced virulence#Gibberella zeae (related: Fusarium graminearum)#Fusarium ear blight#Wheat									putative topoisomerase i protein	DNA topoisomerase 1	IPR001631|IPR008336|IPR011010|IPR013030|IPR013034|IPR013499|IPR013500|IPR014711|IPR014727|IPR025834	DNA breaking-rejoining enzyme, catalytic core|DNA topoisomerase I|DNA topoisomerase I, DNA binding, eukaryotic-type|DNA topoisomerase I, DNA binding, mixed alpha/beta motif, eukaryotic-type|DNA topoisomerase I, catalytic core, alpha-helical subdomain, eukaryotic-type|DNA topoisomerase I, catalytic core, alpha/beta subdomain|DNA topoisomerase I, catalytic core, eukaryotic-type|DNA topoisomerase I,…
	UM591_3389	55.3551	PHI:1348#GzC2H008#I1RC07#Reduced virulence#Gibberella zeae (related: Fusarium graminearum)#Fusarium ear blight#Wheat									hypothetical protein	-	IPR007042|IPR007087|IPR021933|IPR025239	Arsenite-resistance protein 2|Domain of unknown function DUF4187|Protein of unknown function DUF3546|Zinc finger, C2H2
	UM591_3411	50.2924	PHI:1567#GzOB007#I1RCB7#Unaffected pathogenicity#Gibberella zeae (related: Fusarium graminearum)#Fusarium ear blight#Wheat									hypothetical protein	DNA-directed RNA polymerase II subunit rpb7	IPR003029|IPR005576|IPR012340	Nucleic acid-binding, OB-fold|RNA polymerase Rpb7, N-terminal|Ribosomal protein S1, RNA-binding domain
	UM591_3533	81.1146	PHI:1223#FGSG_12887#I1RN31#Lethal#Gibberella zeae (related: Fusarium graminearum)#Fusarium ear blight#Wheat									hypothetical protein	Negative regulator of the PHO system	IPR000719|IPR002290|IPR008271|IPR011009|IPR017441	Protein kinase domain|Protein kinase, ATP binding site|Protein kinase-like domain|Serine/threonine- /dual specificity protein kinase, catalytic domain|Serine/threonine-protein kinase, active site
	UM591_3552	55.102	PHI:1653#GzWing026#I1S2A0#Unaffected pathogenicity#Gibberella zeae (related: Fusarium graminearum)#Fusarium ear blight#Wheat									hypothetical protein	-	IPR011991|IPR014048	Methylated-DNA-[protein]-cysteine S-methyltransferase, DNA binding|Winged helix-turn-helix DNA-binding domain
	UM591_3996	91.7241	PHI:1604#GzOB045#I1S1V9#Unaffected pathogenicity#Gibberella zeae (related: Fusarium graminearum)#Fusarium ear blight#Wheat									hypothetical protein	40S ribosomal protein S23	IPR005680|IPR006032|IPR012340	Nucleic acid-binding, OB-fold|Ribosomal protein S12/S23|Ribosomal protein S23, eukaryotic/archaeal
	UM591_4142	77.9279	PHI:443#CBL1#I1RE58#Reduced virulence#Gibberella zeae (related: Fusarium graminearum)#Fusarium ear blight#Wheat									similar to cystathionine beta-lyase	Cystathionine beta-lyase	IPR000277|IPR006238|IPR015421|IPR015422|IPR015424	Cys/Met metabolism, pyridoxal phosphate-dependent enzyme|Cystathionine beta-lyase, eukaryotic|Pyridoxal phosphate-dependent transferase|Pyridoxal phosphate-dependent transferase, major region, subdomain 1|Pyridoxal phosphate-dependent transferase, major region, subdomain 2
	UM591_4148	75.1592	PHI:1590#GzOB030#I1RWI5#Lethal#Gibberella zeae (related: Fusarium graminearum)#Fusarium ear blight#Wheat									-	-	IPR001253|IPR006196|IPR012340|IPR018104	Nucleic acid-binding, OB-fold|RNA-binding domain, S1, IF1 type|Translation initiation factor 1A (eIF-1A)|Translation initiation factor 1A (eIF-1A), conserved site
	UM591_4238	66.5116	PHI:1187#Sc Dbf2/Dbf20 homolog#I1RWG6#Reduced virulence#Gibberella zeae (related: Fusarium graminearum)#Fusarium ear blight#Wheat									hypothetical protein	Serine/threonine-protein kinase sid2	IPR000719|IPR000961|IPR002290|IPR008271|IPR011009|IPR017441|IPR017892	AGC-kinase, C-terminal|Protein kinase domain|Protein kinase, ATP binding site|Protein kinase, C-terminal|Protein kinase-like domain|Serine/threonine- /dual specificity protein kinase, catalytic domain|Serine/threonine-protein kinase, active site
	UM591_4254	56.6845	PHI:1685#GzRad003#I1S5Z3#Unaffected pathogenicity#Gibberella zeae (related: Fusarium graminearum)#Fusarium ear blight#Wheat									similar to AAA ATPase central domain protein	-	IPR003593|IPR003959|IPR006642|IPR008921|IPR021886|IPR027417	AAA+ ATPase domain|ATPase, AAA-type, core|DNA polymerase III, clamp loader complex, gamma/delta/delta subunit, C-terminal|MgsA AAA+ ATPase C-terminal|P-loop containing nucleoside triphosphate hydrolase|Zinc finger, Rad18-type putative
	UM591_4333	64.2534	PHI:1534#GzMADS001#I1RWM0#Unaffected pathogenicity#Gibberella zeae (related: Fusarium graminearum)#Fusarium ear blight#Wheat									hypothetical protein	-	IPR002100	Transcription factor, MADS-box
	UM591_4340	72.4843	PHI:1226#FGSG_11614#I1RP88#Lethal#Gibberella zeae (related: Fusarium graminearum)#Fusarium ear blight#Wheat									hypothetical protein	Serine/threonine-protein kinase gad8	IPR000719|IPR000961|IPR002290|IPR008271|IPR011009|IPR017441|IPR017892	AGC-kinase, C-terminal|Protein kinase domain|Protein kinase, ATP binding site|Protein kinase, C-terminal|Protein kinase-like domain|Serine/threonine- /dual specificity protein kinase, catalytic domain|Serine/threonine-protein kinase, active site
	UM591_4341	65.2381	PHI:1553#GzMyb017#I1S7F8#Reduced virulence#Gibberella zeae (related: Fusarium graminearum)#Fusarium ear blight#Wheat									similar to SAGA-complex transcriptional adaptor subunit	-	IPR000433|IPR001005|IPR007526|IPR009057|IPR016827|IPR017884	Homeodomain-like|SANT domain|SANT/Myb domain|SWIRM domain|Transcriptional adaptor 2|Zinc finger, ZZ-type
	UM591_4349	84.0491	PHI:1563#GzOB003#I1RAX7#Unaffected pathogenicity#Gibberella zeae (related: Fusarium graminearum)#Fusarium ear blight#Wheat									40S ribosomal protein S11	40S ribosomal protein S11-A	IPR000266|IPR012340|IPR019979|IPR028333	Nucleic acid-binding, OB-fold|Ribosomal protein S17|Ribosomal protein S17, archaeal/eukaryotic|Ribosomal protein S17, conserved site
	UM591_4398	52.1158	PHI:1412#GzC2H079#I1RZ85#Unaffected pathogenicity#Gibberella zeae (related: Fusarium graminearum)#Fusarium ear blight#Wheat									hypothetical protein	DNA-binding protein creA	IPR007087|IPR013087|IPR015880	Zinc finger C2H2-type/integrase DNA-binding domain|Zinc finger, C2H2|Zinc finger, C2H2-like
	UM591_4406	53.7226	PHI:1675#GzDHHC003#Q4I8B6#Unaffected pathogenicity#Gibberella zeae (related: Fusarium graminearum)#Fusarium ear blight#Wheat									hypothetical protein	Palmitoyltransferase akr1	IPR001594|IPR002110|IPR020683	Ankyrin repeat|Ankyrin repeat-containing domain|Zinc finger, DHHC-type, palmitoyltransferase
	UM591_4441	66.7482	PHI:1230#FGSG_13509#ERROR 42#Lethal#Gibberella zeae (related: Fusarium graminearum)#Fusarium ear blight#Wheat									hypothetical protein	Serine/threonine-protein kinase ark1	IPR000719|IPR002290|IPR008271|IPR011009|IPR017441	Protein kinase domain|Protein kinase, ATP binding site|Protein kinase-like domain|Serine/threonine- /dual specificity protein kinase, catalytic domain|Serine/threonine-protein kinase, active site
	UM591_4476	51.5789	PHI:1413#GzC2H080#I1RZD4#Unaffected pathogenicity#Gibberella zeae (related: Fusarium graminearum)#Fusarium ear blight#Wheat									hypothetical protein	-	IPR007219	Transcription factor domain, fungi
	UM591_4604	55.1463	PHI:1212#FGSG_12149#I1RCJ5#Reduced virulence#Gibberella zeae (related: Fusarium graminearum)#Fusarium ear blight#Wheat									similar to serine threonine protein kinase	-	IPR000014|IPR000719|IPR000961|IPR001789|IPR002290|IPR008271|IPR011006|IPR011009	AGC-kinase, C-terminal|CheY-like superfamily|PAS domain|Protein kinase domain|Protein kinase-like domain|Serine/threonine- /dual specificity protein kinase, catalytic domain|Serine/threonine-protein kinase, active site|Signal transduction response regulator, receiver domain
	UM591_4682	54.386	PHI:1575#GzOB015#I1RIQ3#Unaffected pathogenicity#Gibberella zeae (related: Fusarium graminearum)#Fusarium ear blight#Wheat	AA9.hmm	extr							glycoside hydrolase family 61 protein	-	IPR005103	Glycoside hydrolase, family 61
	UM591_4879	55.3398	PHI:1086#FGSG_00416#I1RA89#Reduced virulence#Gibberella zeae (related: Fusarium graminearum)#Fusarium ear blight#Wheat									similar to nitrate transporter	Nitrate transporter	IPR004737|IPR011701|IPR016196|IPR020846	Major facilitator superfamily|Major facilitator superfamily domain|Major facilitator superfamily domain, general substrate transporter|Nitrate transporter
	UM591_5033	72.4265	PHI:1094#FGSG_04610#I1RL30#Unaffected pathogenicity#Gibberella zeae (related: Fusarium graminearum)#Fusarium ear blight#Wheat									alpha-glucosides permease MPH2/3	-	IPR003663|IPR005828|IPR005829|IPR016196|IPR020846	General substrate transporter|Major facilitator superfamily domain|Major facilitator superfamily domain, general substrate transporter|Sugar transporter, conserved site|Sugar/inositol transporter
	UM591_5063	62.2642	PHI:1248#FGSG_03146#I1RRU2#Unaffected pathogenicity#Gibberella zeae (related: Fusarium graminearum)#Fusarium ear blight#Wheat									hypothetical protein	-	IPR000719|IPR002290|IPR008271|IPR011009|IPR017441	Protein kinase domain|Protein kinase, ATP binding site|Protein kinase-like domain|Serine/threonine- /dual specificity protein kinase, catalytic domain|Serine/threonine-protein kinase, active site
	UM591_5202	88.1081	PHI:1235#FGSG_04416#I1RWQ2#Lethal#Gibberella zeae (related: Fusarium graminearum)#Fusarium ear blight#Wheat									hypothetical protein	Casein kinase I homolog hhp1	IPR000719|IPR002290|IPR008271|IPR011009|IPR017441	Protein kinase domain|Protein kinase, ATP binding site|Protein kinase-like domain|Serine/threonine- /dual specificity protein kinase, catalytic domain|Serine/threonine-protein kinase, active site
	UM591_5270	54.065	PHI:1589#GzOB029#I1RWH5#Unaffected pathogenicity#Gibberella zeae (related: Fusarium graminearum)#Fusarium ear blight#Wheat									hypothetical protein	-	IPR004088|IPR012340|IPR026699	Exosome complex RNA-binding protein 1/RRP40/RRP4|K Homology domain, type 1|Nucleic acid-binding, OB-fold
	UM591_5360	58.5678	PHI:1078#Mes1#I1RRG0#Reduced virulence#Gibberella zeae (related: Fusarium graminearum)#Fusarium ear blight#Wheat									similar to MesA	Protein mesA	IPR012860	Arf3-interacting protein 1, N-terminal domain
	UM591_5449	61.9048	PHI:1666#GzCCHC006#I1RX47#Unaffected pathogenicity#Gibberella zeae (related: Fusarium graminearum)#Fusarium ear blight#Wheat									hypothetical protein	Pre-mRNA-splicing factor slu7	IPR021715	Pre-mRNA splicing Prp18-interacting factor
	UM591_5666	78.1746	PHI:442#MSY1#I1S241#Reduced virulence#Gibberella zeae (related: Fusarium graminearum)#Fusarium ear blight#Maize									hypothetical protein	Probable 5-methyltetrahydropteroyltriglutamate--homocysteine methyltransferase	IPR002629|IPR006276|IPR013215	Cobalamin-independent methionine synthase|Cobalamin-independent methionine synthase MetE, C-terminal/archaeal|Cobalamin-independent methionine synthase MetE, N-terminal
	UM591_5738	68.3292	PHI:1203#Sc Yck1/2/3 homolog#I1S050#Reduced virulence#Gibberella zeae (related: Fusarium graminearum)#Fusarium ear blight#Wheat									similar to casein kinase I	Casein kinase I homolog 2	IPR000719|IPR002290|IPR008271|IPR011009	Protein kinase domain|Protein kinase-like domain|Serine/threonine- /dual specificity protein kinase, catalytic domain|Serine/threonine-protein kinase, active site
	UM591_5745	56.5625	PHI:1419#GzC2H086#I1S0X7#Unaffected pathogenicity#Gibberella zeae (related: Fusarium graminearum)#Fusarium ear blight#Wheat				C19.089	-	D19Ertd721e peptidase ({Mus musculus} chromosome 19) (Mus musculus)			hypothetical protein	-	IPR000449|IPR001012|IPR007087|IPR009060|IPR015940|IPR029071	UBA-like|UBX domain|Ubiquitin-associated domain/translation elongation factor EF-Ts, N-terminal|Ubiquitin-associated/translation elongation factor EF1B, N-terminal, eukaryote|Ubiquitin-related domain|Zinc finger, C2H2
	UM591_5788	58.7933	PHI:1247#FGSG_02488#I1S0G8#Unaffected pathogenicity#Gibberella zeae (related: Fusarium graminearum)#Fusarium ear blight#Wheat									hypothetical protein	-	IPR000719|IPR002290|IPR011009|IPR011989|IPR016024	Armadillo-like helical|Armadillo-type fold|Protein kinase domain|Protein kinase-like domain|Serine/threonine- /dual specificity protein kinase, catalytic domain
	UM591_5902	52.0833	PHI:1624#GzJUM006#I1SAP7#Unaffected pathogenicity#Gibberella zeae (related: Fusarium graminearum)#Fusarium ear blight#Wheat									hypothetical protein	-	IPR003347|IPR014710|IPR018866	JmjC domain|RmlC-like jelly roll fold|Zinc-finger domain of monoamine-oxidase A repressor R1
	UM591_6156	76.4706	PHI:1289#FGSG_04416#I1RKK5#Unaffected pathogenicity#Gibberella zeae (related: Fusarium graminearum)#Fusarium ear blight#Wheat									hypothetical protein	-	IPR003594|IPR004358|IPR005467|IPR018955	Branched-chain alpha-ketoacid dehydrogenase kinase/Pyruvate dehydrogenase kinase, N-terminal|Histidine kinase-like ATPase, ATP-binding domain|Signal transduction histidine kinase, core|Signal transduction histidine kinase-related protein, C-terminal
	UM591_6236	59.1549	PHI:1228#FGSG_07745#I1RR00#Lethal#Gibberella zeae (related: Fusarium graminearum)#Fusarium ear blight#Wheat									hypothetical protein	Serine/threonine-protein kinase rio1	IPR000687|IPR011009|IPR017407|IPR018934|IPR018935	Protein kinase-like domain|RIO kinase|RIO kinase, conserved site|RIO-like kinase|Serine/threonine-protein kinase Rio1
	UM591_6272	65.8228	PHI:1533#GzLam002#I1S0F5#Reduced virulence#Gibberella zeae (related: Fusarium graminearum)#Fusarium ear blight#Wheat									hypothetical protein	Multiprotein-bridging factor 1	IPR001387|IPR010982|IPR013729	Cro/C1-type helix-turn-helix domain|Lambda repressor-like, DNA-binding domain|Multiprotein bridging factor 1, N-terminal
	UM591_6323	60.8768	PHI:1648#GzWing020#I1RWP1#Reduced virulence#Gibberella zeae (related: Fusarium graminearum)#Fusarium ear blight#Wheat									similar to myosin type II heavy chain	-	IPR000048|IPR001609|IPR002928|IPR027401|IPR027417	IQ motif, EF-hand binding site|Myosin head, motor domain|Myosin tail|Myosin-like IQ motif-containing domain|P-loop containing nucleoside triphosphate hydrolase
	UM591_6327	57.9365	PHI:1530#Gzsnd#I1RWP4#Unaffected pathogenicity#Gibberella zeae (related: Fusarium graminearum)#Fusarium ear blight#Wheat									hypothetical protein	-	IPR002999|IPR016071|IPR016685	RNA-induced silencing complex, nuclease component Tudor-SN|Staphylococcal nuclease (SNase-like), OB-fold|Tudor domain
	UM591_6404	55.2189	PHI:1440#GzNot002#I1SA65#Reduced virulence#Gibberella zeae (related: Fusarium graminearum)#Fusarium ear blight#Wheat									CCR4-NOT transcription complex	-	IPR007207|IPR007282|IPR012270	CCR4-NOT complex, subunit 3 /5|CCR4-Not complex component, Not N-terminal domain|NOT2/NOT3/NOT5
	UM591_6500	50.6964	PHI:1407#GzC2H071#I1RX64#Lethal#Gibberella zeae (related: Fusarium graminearum)#Fusarium ear blight#Wheat									sister chromatid cohesion protein Eso1	-	IPR001126|IPR017061|IPR017961|IPR017963	DNA polymerase eta|DNA polymerase, Y-family, little finger domain|DNA-repair protein, UmuC-like|DNA-repair protein, UmuC-like, N-terminal
	UM591_6525	52.9703	PHI:1398#GzC2H061#I1RV65#Unaffected pathogenicity#Gibberella zeae (related: Fusarium graminearum)#Fusarium ear blight#Wheat									Protein SIP5	Protein SIP5	-	-
	UM591_6724	72.8597	PHI:1193#Sc Sky1 homolog#I1RGD6#Reduced virulence#Gibberella zeae (related: Fusarium graminearum)#Fusarium ear blight#Wheat									serine/threonine-protein kinase SRPK2	-	IPR000719|IPR002290|IPR008271|IPR011009|IPR017441	Protein kinase domain|Protein kinase, ATP binding site|Protein kinase-like domain|Serine/threonine- /dual specificity protein kinase, catalytic domain|Serine/threonine-protein kinase, active site
	UM591_6730	54.6169	PHI:1692#GzZC007#I1RYR6#Unaffected pathogenicity#Gibberella zeae (related: Fusarium graminearum)#Fusarium ear blight#Wheat									hypothetical protein	-	IPR001138|IPR001248|IPR007219	Permease, cytosine/purines, uracil, thiamine, allantoin|Transcription factor domain, fungi|Zn(2)-C6 fungal-type DNA-binding domain
	UM591_6959	59.9515	PHI:1096#FGSG_07062#I1RSE4#Unaffected pathogenicity#Gibberella zeae (related: Fusarium graminearum)#Fusarium ear blight#Wheat									hypothetical protein	-	IPR004342	EXS, C-terminal
	UM591_6969	60.9756	PHI:1458#GzAra006#Q4I7F9#Unaffected pathogenicity#Gibberella zeae (related: Fusarium graminearum)#Fusarium ear blight#Wheat									Pre-mRNA-splicing ATP-dependent RNA helicase PRP28	Pre-mRNA-splicing ATP-dependent RNA helicase PRP28	IPR000629|IPR001650|IPR011545|IPR014001|IPR014014|IPR027417	DNA/RNA helicase, DEAD/DEAH box type, N-terminal|Helicase, C-terminal|Helicase, superfamily 1/2, ATP-binding domain|P-loop containing nucleoside triphosphate hydrolase|RNA helicase, ATP-dependent, DEAD-box, conserved site|RNA helicase, DEAD-box type, Q motif
	UM591_6997	51.8771	PHI:1526#GzHOMEL036#I1S0J3#Unaffected pathogenicity#Gibberella zeae (related: Fusarium graminearum)#Fusarium ear blight#Wheat									hypothetical protein	-	IPR000330|IPR001650|IPR014001|IPR027417|IPR029256	Helicase, C-terminal|Helicase, superfamily 1/2, ATP-binding domain|Helicase-associated putative binding domain|P-loop containing nucleoside triphosphate hydrolase|SNF2-related
	UM591_7018	73.6739	PHI:1555#GzMyb019#I1RDG6#Unaffected pathogenicity#Gibberella zeae (related: Fusarium graminearum)#Fusarium ear blight#Wheat									hypothetical protein	Uncharacterized transporter YIL166C	IPR011701|IPR016196	Major facilitator superfamily|Major facilitator superfamily domain, general substrate transporter
	UM591_7115	53.2474	PHI:713#PKS13 (related: ZEA2)#ABB90282#Unaffected pathogenicity#Gibberella zeae (related: Fusarium graminearum)#Fusarium ear blight#Barley									Thiolase-like protein	-	IPR001031|IPR001227|IPR006162|IPR009081|IPR014030|IPR014031|IPR014043|IPR016035|IPR016036|IPR016038|IPR016039|IPR020801|IPR020806|IPR020841|IPR029058	Acyl carrier protein-like|Acyl transferase|Acyl transferase domain|Acyl transferase/acyl hydrolase/lysophospholipase|Alpha/Beta hydrolase fold|Beta-ketoacyl synthase, C-terminal|Beta-ketoacyl synthase, N-terminal|Malonyl-CoA ACP transacylase, ACP-binding|Phosphopantetheine attachment site|Polyketide synthase, acyl transferase domain|Polyketide synthase, beta-ketoacyl synthase domain|Polyketide sy…
	UM591_7116	59.1272	PHI:714#PKS4 (related: ZEA1)#ABB90283#Unaffected pathogenicity#Gibberella zeae (related: Fusarium graminearum)#Fusarium ear blight#Wheat									Thiolase-like protein	-	IPR001227|IPR002364|IPR006162|IPR009081|IPR011032|IPR013149|IPR013968|IPR014030|IPR014031|IPR014043|IPR016035|IPR016036|IPR016038|IPR016039|IPR016040|IPR020801|IPR020806|IPR020807|IPR020841|IPR020842|IPR020843	Acyl carrier protein-like|Acyl transferase|Acyl transferase domain|Acyl transferase/acyl hydrolase/lysophospholipase|Alcohol dehydrogenase, C-terminal|Beta-ketoacyl synthase, C-terminal|Beta-ketoacyl synthase, N-terminal|GroES (chaperonin 10)-like|Malonyl-CoA ACP transacylase, ACP-binding|NAD(P)-binding domain|Phosphopantetheine attachment site|Polyketide synthase, KR|Polyketide synthase, acyl tr…
	UM591_7174	55.7377	PHI:1670#GzCCHC010#I1S0Q0#Unaffected pathogenicity#Gibberella zeae (related: Fusarium graminearum)#Fusarium ear blight#Wheat									similar to zinc knuckle domain-containing protein	-	IPR001878	Zinc finger, CCHC-type
	UM591_7296	58.6119	PHI:714#PKS4 (related: ZEA1)#ABB90283#Unaffected pathogenicity#Gibberella zeae (related: Fusarium graminearum)#Fusarium ear blight#Wheat									CURS1	-	IPR001227|IPR002328|IPR002364|IPR006162|IPR009081|IPR011032|IPR013149|IPR013154|IPR013968|IPR014030|IPR014031|IPR014043|IPR016035|IPR016036|IPR016038|IPR016039|IPR016040|IPR020801|IPR020806|IPR020807|IPR020841|IPR020842|IPR020843	Acyl carrier protein-like|Acyl transferase|Acyl transferase domain|Acyl transferase/acyl hydrolase/lysophospholipase|Alcohol dehydrogenase GroES-like|Alcohol dehydrogenase, C-terminal|Alcohol dehydrogenase, zinc-type, conserved site|Beta-ketoacyl synthase, C-terminal|Beta-ketoacyl synthase, N-terminal|GroES (chaperonin 10)-like|Malonyl-CoA ACP transacylase, ACP-binding|NAD(P)-binding domain|Phosp…
	UM591_7324	94.958	PHI:1468#GzCCAAT008#Q4HTT1#Unaffected pathogenicity#Gibberella zeae (related: Fusarium graminearum)#Fusarium ear blight#Wheat									hypothetical protein	Histone H2A	IPR002119|IPR007125|IPR009072	Histone H2A|Histone core|Histone-fold
	UM591_7399	54.7826	PHI:1397#GzC2H060#I1RUQ2#Unaffected pathogenicity#Gibberella zeae (related: Fusarium graminearum)#Fusarium ear blight#Wheat									hypothetical protein	-	IPR000690|IPR003604|IPR007087|IPR022755	Zinc finger, C2H2|Zinc finger, C2H2-type matrin|Zinc finger, U1-type|Zinc finger, double-stranded RNA binding
	UM591_7510	52.2782	PHI:1451#GzGH#I1RQL1#Unaffected pathogenicity#Gibberella zeae (related: Fusarium graminearum)#Fusarium ear blight#Wheat									hypothetical protein	-	IPR007604	CP2 transcription factor
	UM591_7534	52.7831	PHI:1086#FGSG_00416#I1RA89#Reduced virulence#Gibberella zeae (related: Fusarium graminearum)#Fusarium ear blight#Wheat									putative nitrate transporter protein	Nitrate transporter	IPR004737|IPR011701|IPR016196|IPR020846	Major facilitator superfamily|Major facilitator superfamily domain|Major facilitator superfamily domain, general substrate transporter|Nitrate transporter
	UM591_7813	51.4831	PHI:716#ZEB1#ABB90284#Unaffected pathogenicity#Gibberella zeae (related: Fusarium graminearum)#Fusarium ear blight#Barley	AA7.hmm								Putative FAD-linked oxidoreductase yvdP	-	IPR006094|IPR012951|IPR016166|IPR016169	Berberine/berberine-like|CO dehydrogenase flavoprotein-like, FAD-binding, subdomain 2|FAD linked oxidase, N-terminal|FAD-binding, type 2
	UM591_7919	87.4016	PHI:1584#GzOB024#I1RS24#Unaffected pathogenicity#Gibberella zeae (related: Fusarium graminearum)#Fusarium ear blight#Wheat									hypothetical protein	60S ribosomal protein L2	IPR002171|IPR008991|IPR012340|IPR014722|IPR014726|IPR022666|IPR022669|IPR022671	Nucleic acid-binding, OB-fold|Ribosomal Proteins L2, RNA binding domain|Ribosomal protein L2|Ribosomal protein L2 domain 2|Ribosomal protein L2, C-terminal|Ribosomal protein L2, conserved site|Ribosomal protein L2, domain 3|Translation protein SH3-like domain
	UM591_7927	53.6089	PHI:1621#GzRUM1#I1RP98#Unaffected pathogenicity#Gibberella zeae (related: Fusarium graminearum)#Fusarium ear blight#Wheat									hypothetical protein	-	IPR001606|IPR001965|IPR003347|IPR003349|IPR004198|IPR011011|IPR013083|IPR013637|IPR019786|IPR019787	ARID/BRIGHT DNA-binding domain|JmjC domain|Lysine-specific demethylase-like domain|Transcription factor jumonji, JmjN|Zinc finger, C5HC2-type|Zinc finger, FYVE/PHD-type|Zinc finger, PHD-finger|Zinc finger, PHD-type|Zinc finger, PHD-type, conserved site|Zinc finger, RING/FYVE/PHD-type
	UM591_7985	56.3417	PHI:1227#FGSG_07742#I1RPV7#Lethal#Gibberella zeae (related: Fusarium graminearum)#Fusarium ear blight#Wheat									hypothetical protein	-	IPR000403|IPR003151|IPR003152|IPR011009|IPR011989|IPR014009|IPR016024	Armadillo-like helical|Armadillo-type fold|PIK-related kinase|PIK-related kinase, FAT|PIK-related kinase, FATC|Phosphatidylinositol 3-/4-kinase, catalytic domain|Protein kinase-like domain
	UM591_8020	53.0572	PHI:1375#GzC2H038#I1RPA0#Unaffected pathogenicity#Gibberella zeae (related: Fusarium graminearum)#Fusarium ear blight#Wheat									hypothetical protein	-	IPR000690|IPR003604|IPR007087|IPR021966|IPR024598	Domain of unknown function DUF3449|Splicing factor SF3a60 binding domain|Zinc finger, C2H2|Zinc finger, C2H2-type matrin|Zinc finger, U1-type
	UM591_8039	79.3846	PHI:1178#Sc Cdc28 homolog#I1RW16#Reduced virulence#Gibberella zeae (related: Fusarium graminearum)#Fusarium ear blight#Wheat									hypothetical protein	Cyclin-dependent kinase 1	IPR000719|IPR002290|IPR008271|IPR011009|IPR017441	Protein kinase domain|Protein kinase, ATP binding site|Protein kinase-like domain|Serine/threonine- /dual specificity protein kinase, catalytic domain|Serine/threonine-protein kinase, active site
	UM591_8196	91.2821	PHI:1566#GzOB006#I1RC95#Lethal#Gibberella zeae (related: Fusarium graminearum)#Fusarium ear blight#Wheat									hypothetical protein	Probable 26S protease subunit rpt4	IPR003593|IPR003959|IPR003960|IPR005937|IPR027417	26S proteasome subunit P45|AAA+ ATPase domain|ATPase, AAA-type, conserved site|ATPase, AAA-type, core|P-loop containing nucleoside triphosphate hydrolase
	UM591_8206	62.9412	PHI:1645#GzWing017#I1RTD1#Unaffected pathogenicity#Gibberella zeae (related: Fusarium graminearum)#Fusarium ear blight#Wheat									Rho-GTPase-activating protein 8	-	IPR000198|IPR000591|IPR001060|IPR008936|IPR011991	DEP domain|FCH domain|Rho GTPase activation protein|Rho GTPase-activating protein domain|Winged helix-turn-helix DNA-binding domain
	UM591_8255	52.2406	PHI:1252#FGSG_12132#I1RP15#Unaffected pathogenicity#Gibberella zeae (related: Fusarium graminearum)#Fusarium ear blight#Wheat									hypothetical protein	-	IPR000719|IPR002290|IPR008271|IPR011009|IPR017441	Protein kinase domain|Protein kinase, ATP binding site|Protein kinase-like domain|Serine/threonine- /dual specificity protein kinase, catalytic domain|Serine/threonine-protein kinase, active site
	UM591_8288	61.2519	PHI:1257#FGSG_13509#I1RSK0#Unaffected pathogenicity#Gibberella zeae (related: Fusarium graminearum)#Fusarium ear blight#Wheat									hypothetical protein	-	IPR000253|IPR000719|IPR002290|IPR008271|IPR008984|IPR011009|IPR017441|IPR020636	Calcium/calmodulin-dependent/calcium-dependent protein kinase|Forkhead-associated (FHA) domain|Protein kinase domain|Protein kinase, ATP binding site|Protein kinase-like domain|SMAD/FHA domain|Serine/threonine- /dual specificity protein kinase, catalytic domain|Serine/threonine-protein kinase, active site
	UM591_8510	66.1916	PHI:1579#GzOB019#I1RM25#Unaffected pathogenicity#Gibberella zeae (related: Fusarium graminearum)#Fusarium ear blight#Wheat									hypothetical protein	Pre-mRNA-splicing factor ATP-dependent RNA helicase prp22	IPR001650|IPR002464|IPR003029|IPR007502|IPR011545|IPR011709|IPR012340|IPR014001|IPR022967|IPR027417	DNA/RNA helicase, ATP-dependent, DEAH-box type, conserved site|DNA/RNA helicase, DEAD/DEAH box type, N-terminal|Domain of unknown function DUF1605|Helicase, C-terminal|Helicase, superfamily 1/2, ATP-binding domain|Helicase-associated domain|Nucleic acid-binding, OB-fold|P-loop containing nucleoside triphosphate hydrolase|RNA-binding domain, S1|Ribosomal protein S1, RNA-binding domain
	UM591_8543	57.0423	PHI:1580#GzOB020#I1RM35#Unaffected pathogenicity#Gibberella zeae (related: Fusarium graminearum)#Fusarium ear blight#Wheat									hypothetical protein	-	IPR002547|IPR004046|IPR010987|IPR012340	Glutathione S-transferase, C-terminal|Glutathione S-transferase, C-terminal-like|Nucleic acid-binding, OB-fold|tRNA-binding domain
	UM591_8588	68.5315	PHI:1599#GzOB039#I1RZ39#Unaffected pathogenicity#Gibberella zeae (related: Fusarium graminearum)#Fusarium ear blight#Wheat									putative mitochondrial 37S ribosomal protein MRPS12	30S ribosomal protein S12, chloroplastic	IPR005679|IPR006032|IPR012340	Nucleic acid-binding, OB-fold|Ribosomal protein S12, bacteria|Ribosomal protein S12/S23
	UM591_8665	55.3606	PHI:1637#GzWing009#Q4IEV4#Lethal#Gibberella zeae (related: Fusarium graminearum)#Fusarium ear blight#Wheat									hypothetical protein	Histone acetyltransferase esa1	IPR000953|IPR002717|IPR016181|IPR016197|IPR025995	Acyl-CoA N-acyltransferase|Chromo domain-like|Chromo domain/shadow|MOZ/SAS-like protein|RNA binding activity-knot of a chromodomain
	UM591_8676	59.5588	PHI:1598#GzOB038#I1RZ35#Reduced virulence#Gibberella zeae (related: Fusarium graminearum)#Fusarium ear blight#Wheat									hypothetical protein	-	IPR001253|IPR006196|IPR012340	Nucleic acid-binding, OB-fold|RNA-binding domain, S1, IF1 type|Translation initiation factor 1A (eIF-1A)
	UM591_8820	65.2273	PHI:1570#GzOB010#I1RE46#Unaffected pathogenicity#Gibberella zeae (related: Fusarium graminearum)#Fusarium ear blight#Wheat									hypothetical protein	DNA replication licensing factor mcm3	IPR001208|IPR003593|IPR008046|IPR012340|IPR018525|IPR027417|IPR027925	AAA+ ATPase domain|DNA replication licensing factor Mcm3|MCM N-terminal domain|Mini-chromosome maintenance, DNA-dependent ATPase|Mini-chromosome maintenance, conserved site|Nucleic acid-binding, OB-fold|P-loop containing nucleoside triphosphate hydrolase
	UM591_9006	60.7477	PHI:1468#GzCCAAT008#Q4HTT1#Unaffected pathogenicity#Gibberella zeae (related: Fusarium graminearum)#Fusarium ear blight#Wheat									hypothetical protein	Histone H2A.Z	IPR002119|IPR007125|IPR009072	Histone H2A|Histone core|Histone-fold
	UM591_9045	50.6757	PHI:1529#Gzscp#I1RS41#Reduced virulence#Gibberella zeae (related: Fusarium graminearum)#Fusarium ear blight#Wheat									hypothetical protein	-	IPR011990|IPR013026|IPR013105|IPR019734	Tetratricopeptide TPR2|Tetratricopeptide repeat|Tetratricopeptide repeat-containing domain|Tetratricopeptide-like helical
	UM591_9076	55.3879	PHI:1180#Sc Sat4 homolog#I1RS32#Reduced virulence#Gibberella zeae (related: Fusarium graminearum)#Fusarium ear blight#Wheat									hypothetical protein	-	IPR000719|IPR002290|IPR008271|IPR011009|IPR017441	Protein kinase domain|Protein kinase, ATP binding site|Protein kinase-like domain|Serine/threonine- /dual specificity protein kinase, catalytic domain|Serine/threonine-protein kinase, active site
	UM591_9082	84.8718	PHI:1200#Gsk3 homolog#I1RT36#Reduced virulence#Gibberella zeae (related: Fusarium graminearum)#Fusarium ear blight#Wheat									similar to glycogen synthase kinase-3 beta	Protein kinase gsk3	IPR000719|IPR002290|IPR008271|IPR011009|IPR017441	Protein kinase domain|Protein kinase, ATP binding site|Protein kinase-like domain|Serine/threonine- /dual specificity protein kinase, catalytic domain|Serine/threonine-protein kinase, active site
	UM591_9175	57.4913	PHI:1463#GzCCAAT003#I1RFW6#Unaffected pathogenicity#Gibberella zeae (related: Fusarium graminearum)#Fusarium ear blight#Wheat									hypothetical protein	-	IPR003958|IPR009072|IPR027170	Histone-fold|Transcription factor CBF/NF-Y/archaeal histone|Transcriptional activator NFYC/HAP5 subunit
	UM591_9234	78.9809	PHI:1571#GzOB011#I1RE76#Unaffected pathogenicity#Gibberella zeae (related: Fusarium graminearum)#Fusarium ear blight#Wheat									eukaryotic translation initiation factor 5A	Eukaryotic translation initiation factor 5A	IPR001884|IPR005824|IPR008991|IPR012340|IPR014722|IPR019769|IPR020189	KOW|Nucleic acid-binding, OB-fold|Ribosomal protein L2 domain 2|Translation elongation factor IF5A|Translation elongation factor, IF5A C-terminal|Translation elongation factor, IF5A, hypusine site|Translation protein SH3-like domain
	UM591_9246	56.6893	PHI:1288#FGSG_07812#I1RE83#Unaffected pathogenicity#Gibberella zeae (related: Fusarium graminearum)#Fusarium ear blight#Wheat									kinase isozyme 4, mitochondrial precursor	-	IPR003594|IPR018955	Branched-chain alpha-ketoacid dehydrogenase kinase/Pyruvate dehydrogenase kinase, N-terminal|Histidine kinase-like ATPase, ATP-binding domain
	UM591_9332	52.8029	PHI:2502#FgTep1p#I1RM09#Reduced virulence#Gibberella zeae (related: Fusarium graminearum)#Fusarium head blight#Wheat									hypothetical protein	-	IPR000340|IPR016130|IPR029021|IPR029023	Dual specificity phosphatase, catalytic domain|Protein-tyrosine phosphatase, active site|Protein-tyrosine phosphatase-like|Tensin phosphatase, lipid phosphatase domain
	UM591_9372	61.4213	PHI:1097#FGSG_01974#I1RE92#Reduced virulence#Gibberella zeae (related: Fusarium graminearum)#Fusarium ear blight#Wheat									hypothetical protein	-	IPR014830	Glycolipid transfer protein domain
	UM591_9392	51.8414	PHI:1683#GzRad001#I1RK33#Lethal#Gibberella zeae (related: Fusarium graminearum)#Fusarium ear blight#Wheat									hypothetical protein	-	IPR000306|IPR006642|IPR007087|IPR011011|IPR013083|IPR017455	FYVE zinc finger|Zinc finger, C2H2|Zinc finger, FYVE-related|Zinc finger, FYVE/PHD-type|Zinc finger, RING/FYVE/PHD-type|Zinc finger, Rad18-type putative
	UM591_9474	54.4987	PHI:1232#FGSG_03499#I1RTC2#Lethal#Gibberella zeae (related: Fusarium graminearum)#Fusarium ear blight#Wheat									similar to serine/threonine-protein kinase	-	IPR000719|IPR002290|IPR008271|IPR011009|IPR017441	Protein kinase domain|Protein kinase, ATP binding site|Protein kinase-like domain|Serine/threonine- /dual specificity protein kinase, catalytic domain|Serine/threonine-protein kinase, active site
	UM591_9479	72.4138	PHI:2409#FgMT2#Fg05593.1#Reduced virulence#Gibberella zeae (related: Fusarium graminearum)#Fusarium head blight#Wheat									hypothetical protein	-	IPR003333|IPR029063	Mycolic acid cyclopropane synthase|S-adenosyl-L-methionine-dependent methyltransferase-like
	UM591_9482	50	PHI:1181#Sc Kic1 homolog#I1RNY7#Reduced virulence#Gibberella zeae (related: Fusarium graminearum)#Fusarium ear blight#Wheat									hypothetical protein	-	IPR000719|IPR002290|IPR011009|IPR017441	Protein kinase domain|Protein kinase, ATP binding site|Protein kinase-like domain|Serine/threonine- /dual specificity protein kinase, catalytic domain
	UM591_9596	51.9463	PHI:1879#GzZC194#I1RJB8#Unaffected pathogenicity#Gibberella zeae (related: Fusarium graminearum)#Fusarium ear blight#Wheat									hypothetical protein	-	IPR001138|IPR007219	Transcription factor domain, fungi|Zn(2)-C6 fungal-type DNA-binding domain
	UM591_9627	75.6654	PHI:1574#GzOB014#I1RFX8#Lethal#Gibberella zeae (related: Fusarium graminearum)#Fusarium ear blight#Wheat									hypothetical protein	DNA replication licensing factor mcm2	IPR001208|IPR008045|IPR012340|IPR018525|IPR027417|IPR027925	DNA replication licensing factor Mcm2|MCM N-terminal domain|Mini-chromosome maintenance, DNA-dependent ATPase|Mini-chromosome maintenance, conserved site|Nucleic acid-binding, OB-fold|P-loop containing nucleoside triphosphate hydrolase
	UM591_9663	52.7273	PHI:1603#GzOB044#I1S0A1#Unaffected pathogenicity#Gibberella zeae (related: Fusarium graminearum)#Fusarium ear blight#Wheat									similar to replication protein A 70 kDa DNA-binding subunit	-	IPR004365|IPR004591|IPR007199|IPR012340|IPR013955	Nucleic acid-binding, OB-fold|OB-fold nucleic acid binding domain, AA-tRNA synthetase-type|Replication factor A, C-terminal|Replication factor-A protein 1, N-terminal|Replication factor-a protein 1 Rpa1
	UM591_9681	58.7224	PHI:1233#FGSG_13944#I1RUG2#Lethal#Gibberella zeae (related: Fusarium graminearum)#Fusarium ear blight#Wheat									hypothetical protein	-	IPR000719|IPR002290|IPR008271|IPR011009	Protein kinase domain|Protein kinase-like domain|Serine/threonine- /dual specificity protein kinase, catalytic domain|Serine/threonine-protein kinase, active site
	UM591_9706	60.8365	PHI:1629#GzWing001#I1RAH2#Unaffected pathogenicity#Gibberella zeae (related: Fusarium graminearum)#Fusarium ear blight#Wheat									hypothetical protein	Vacuolar transporter chaperone 4	IPR003807|IPR004331|IPR018966	Domain of unknown function DUF202|SPX, N-terminal|VTC domain
	UM591_9760	65.3846	PHI:1618#GzFET5#Q4IQT8#Unaffected pathogenicity#Gibberella zeae (related: Fusarium graminearum)#Fusarium ear blight#Wheat									hypothetical protein	GPN-loop GTPase 3 homolog AFUA_1G10640	IPR004130|IPR027417	P-loop containing nucleoside triphosphate hydrolase|Uncharacterised protein family, ATP binding
	UM591_9875	61.6056	PHI:1595#GzOB035#I1RX22#Unaffected pathogenicity#Gibberella zeae (related: Fusarium graminearum)#Fusarium ear blight#Wheat									hypothetical protein	Asparagine--tRNA ligase, cytoplasmic	IPR002312|IPR004364|IPR004365|IPR004522|IPR006195|IPR012340|IPR018150	Aminoacyl-tRNA synthetase, class II|Aminoacyl-tRNA synthetase, class II (D/K/N)|Aminoacyl-tRNA synthetase, class II (D/K/N)-like|Asparagine-tRNA ligase|Aspartyl/Asparaginyl-tRNA synthetase, class IIb|Nucleic acid-binding, OB-fold|OB-fold nucleic acid binding domain, AA-tRNA synthetase-type
	UM591_9923	54.0193	PHI:1678#GzGRF#I1RMC1#Unaffected pathogenicity#Gibberella zeae (related: Fusarium graminearum)#Fusarium ear blight#Wheat									similar to kelch repeat protein	-	IPR003892|IPR005123|IPR015915|IPR027450	Alpha-ketoglutarate-dependent dioxygenase AlkB-like|Kelch-type beta propeller|Oxoglutarate/iron-dependent dioxygenase|Ubiquitin system component Cue
	UM591_10198	50.096	PHI:1674#GzDHHC002#Q4IA62#Unaffected pathogenicity#Gibberella zeae (related: Fusarium graminearum)#Fusarium ear blight#Wheat									hypothetical protein	Palmitoyltransferase pfa3	IPR001594	Zinc finger, DHHC-type, palmitoyltransferase
	UM591_10268	53.5088	PHI:1575#GzOB015#I1RIQ3#Unaffected pathogenicity#Gibberella zeae (related: Fusarium graminearum)#Fusarium ear blight#Wheat	AA9.hmm	extr							hypothetical protein	-	IPR005103	Glycoside hydrolase, family 61
	UM591_10397	72.1519	PHI:1532#GzLam001#ERROR 42#Unaffected pathogenicity#Gibberella zeae (related: Fusarium graminearum)#Fusarium ear blight#Wheat									hypothetical protein	Cyanate hydratase	IPR001387|IPR003712|IPR008076|IPR010982	Cro/C1-type helix-turn-helix domain|Cyanate hydratase|Cyanate lyase, C-terminal|Lambda repressor-like, DNA-binding domain
	UM591_10401	58.317	PHI:2491#FgPTC1#I1RJS9#Reduced virulence#Gibberella zeae (related: Fusarium graminearum)#Fusarium head blight#Wheat									similar to protein phosphatase 2C	-	IPR000222|IPR001932|IPR015655	Protein phosphatase 2C|Protein phosphatase 2C (PP2C)-like domain|Protein phosphatase 2C, manganese/magnesium aspartate binding site
	UM591_10460	67.162	PHI:1602#GzOB043#I1RZY1#Unaffected pathogenicity#Gibberella zeae (related: Fusarium graminearum)#Fusarium ear blight#Wheat									hypothetical protein	Glutamate--cysteine ligase	IPR004308	Glutamate-cysteine ligase catalytic subunit
	UM591_10478	68.1499	PHI:1175#Sc Srb10 homolog#I1RKR8#Reduced virulence#Gibberella zeae (related: Fusarium graminearum)#Fusarium ear blight#Wheat									similar to cyclin-dependent protein kinase Ssn3	Serine/threonine-protein kinase SSN3	IPR000719|IPR002290|IPR008271|IPR011009	Protein kinase domain|Protein kinase-like domain|Serine/threonine- /dual specificity protein kinase, catalytic domain|Serine/threonine-protein kinase, active site
	UM591_10509	60.3933	PHI:1014#GzGPA3#I1RZX9#Unaffected pathogenicity#Gibberella zeae (related: Fusarium graminearum)#Fusarium ear blight#Barley									guanine nucleotide-binding protein alpha-2 subunit	Guanine nucleotide-binding protein alpha-2 subunit	IPR001019|IPR002975|IPR011025|IPR027417	Fungal G-protein, alpha subunit|G protein alpha subunit, helical insertion|Guanine nucleotide binding protein (G-protein), alpha subunit|P-loop containing nucleoside triphosphate hydrolase
	UM591_10575	63.4116	PHI:1374#GzC2H037#I1RN37#Unaffected pathogenicity#Gibberella zeae (related: Fusarium graminearum)#Fusarium ear blight#Wheat									hypothetical protein	-	IPR007087|IPR007219|IPR013087|IPR015880	Transcription factor domain, fungi|Zinc finger C2H2-type/integrase DNA-binding domain|Zinc finger, C2H2|Zinc finger, C2H2-like
	UM591_10726	53.2653	PHI:1555#GzMyb019#I1RDG6#Unaffected pathogenicity#Gibberella zeae (related: Fusarium graminearum)#Fusarium ear blight#Wheat									hypothetical protein	-	IPR011701|IPR016196	Major facilitator superfamily|Major facilitator superfamily domain, general substrate transporter
	UM591_10880	60.9608	PHI:722#PGL1#I1RXV6#Unaffected pathogenicity#Gibberella zeae (related: Fusarium graminearum)#Fusarium ear blight#Wheat									hypothetical protein	-	IPR001227|IPR006162|IPR009081|IPR013120|IPR014030|IPR014031|IPR014043|IPR016035|IPR016036|IPR016038|IPR016039|IPR016040|IPR018201|IPR020801|IPR020806|IPR020841	Acyl carrier protein-like|Acyl transferase|Acyl transferase domain|Acyl transferase/acyl hydrolase/lysophospholipase|Beta-ketoacyl synthase, C-terminal|Beta-ketoacyl synthase, N-terminal|Beta-ketoacyl synthase, active site|Male sterility, NAD-binding|Malonyl-CoA ACP transacylase, ACP-binding|NAD(P)-binding domain|Phosphopantetheine attachment site|Polyketide synthase, acyl transferase domain|Poly…
	UM591_11077	52.0362	PHI:1403#GzC2H066#I1RWF1#Reduced virulence#Gibberella zeae (related: Fusarium graminearum)#Fusarium ear blight#Wheat									hypothetical protein	-	IPR007087|IPR013087|IPR015880	Zinc finger C2H2-type/integrase DNA-binding domain|Zinc finger, C2H2|Zinc finger, C2H2-like
	UM591_11094	54.2816	PHI:1793#GzZC108#I1RWT7#Reduced virulence#Gibberella zeae (related: Fusarium graminearum)#Fusarium ear blight#Wheat									hypothetical protein	-	-	-
	UM591_11108	50	PHI:1411#GzC2H078#I1RZ11#Lethal#Gibberella zeae (related: Fusarium graminearum)#Fusarium ear blight#Wheat									-	-	IPR003604|IPR007087|IPR022755	Zinc finger, C2H2|Zinc finger, U1-type|Zinc finger, double-stranded RNA binding
	UM591_11157	67.437	PHI:2408#FgMT1#Fg03951.1#Unaffected pathogenicity#Gibberella zeae (related: Fusarium graminearum)#Fusarium head blight#Wheat									hypothetical protein	-	IPR003333|IPR029063	Mycolic acid cyclopropane synthase|S-adenosyl-L-methionine-dependent methyltransferase-like
	UM591_11205	55.5351	PHI:1694#GzZC009#I1S3X0#Unaffected pathogenicity#Gibberella zeae (related: Fusarium graminearum)#Fusarium ear blight#Wheat									hypothetical protein	-	IPR007087|IPR007219|IPR013087|IPR015880	Transcription factor domain, fungi|Zinc finger C2H2-type/integrase DNA-binding domain|Zinc finger, C2H2|Zinc finger, C2H2-like
	UM591_11212	61.3893	PHI:1238#FGSG_06970#I1S1V3#Lethal#Gibberella zeae (related: Fusarium graminearum)#Fusarium ear blight#Wheat									-	-	IPR000719|IPR002290|IPR008271|IPR011009|IPR011993|IPR017441	Pleckstrin homology-like domain|Protein kinase domain|Protein kinase, ATP binding site|Protein kinase-like domain|Serine/threonine- /dual specificity protein kinase, catalytic domain|Serine/threonine-protein kinase, active site
	UM591_11229	53.5714	PHI:1242#FGSG_02838#I1RWG2#Unaffected pathogenicity#Gibberella zeae (related: Fusarium graminearum)#Fusarium ear blight#Wheat									hypothetical protein	-	IPR000719|IPR002290|IPR008271|IPR011009	Protein kinase domain|Protein kinase-like domain|Serine/threonine- /dual specificity protein kinase, catalytic domain|Serine/threonine-protein kinase, active site
	UM591_11493	53.2443	PHI:1692#GzZC007#I1RYR6#Unaffected pathogenicity#Gibberella zeae (related: Fusarium graminearum)#Fusarium ear blight#Wheat									hypothetical protein	-	IPR001138|IPR007219	Transcription factor domain, fungi|Zn(2)-C6 fungal-type DNA-binding domain
	UM591_11515	82.1023	PHI:1218#FGSG_01559#I1RAY2#Lethal#Gibberella zeae (related: Fusarium graminearum)#Fusarium ear blight#Wheat									similar to valyl-trna synthetase	Valine--tRNA ligase, mitochondrial	IPR000719|IPR001412|IPR002290|IPR002300|IPR002303|IPR008271|IPR009008|IPR009080|IPR011009|IPR013155|IPR014729|IPR017441	Aminoacyl-tRNA synthetase, class 1a, anticodon-binding|Aminoacyl-tRNA synthetase, class I, conserved site|Aminoacyl-tRNA synthetase, class Ia|Protein kinase domain|Protein kinase, ATP binding site|Protein kinase-like domain|Rossmann-like alpha/beta/alpha sandwich fold|Serine/threonine- /dual specificity protein kinase, catalytic domain|Serine/threonine-protein kinase, active site|Valine-tRNA liga…
	UM591_11623	67.3597	PHI:1573#GzOB013#I1RFJ2#Lethal#Gibberella zeae (related: Fusarium graminearum)#Fusarium ear blight#Wheat									hypothetical protein	DNA replication licensing factor mcm6	IPR001208|IPR004039|IPR008049|IPR012340|IPR018525|IPR027417|IPR027925	DNA replication licensing factor Mcm6|MCM N-terminal domain|Mini-chromosome maintenance, DNA-dependent ATPase|Mini-chromosome maintenance, conserved site|Nucleic acid-binding, OB-fold|P-loop containing nucleoside triphosphate hydrolase|Rubredoxin-type fold
	UM591_11639	55.8621	PHI:1577#GzOB017#I1RK79#Unaffected pathogenicity#Gibberella zeae (related: Fusarium graminearum)#Fusarium ear blight#Wheat									similar to DNA-directed RNA polymerases i	-	IPR005570|IPR012340	Nucleic acid-binding, OB-fold|RNA polymerase, Rpb8
	UM591_11783	50.3289	PHI:1087#FGSG_04510#I1RKU0#Unaffected pathogenicity#Gibberella zeae (related: Fusarium graminearum)#Fusarium ear blight#Wheat		extr							related to monophenol monooxygenase (tyrosinase)	-	IPR002227|IPR008922	Tyrosinase copper-binding domain|Uncharacterised domain, di-copper centre
	UM591_11968	55.4924	PHI:1094#FGSG_04610#I1RL30#Unaffected pathogenicity#Gibberella zeae (related: Fusarium graminearum)#Fusarium ear blight#Wheat									hypothetical protein	-	IPR003663|IPR005828|IPR005829|IPR016196|IPR020846	General substrate transporter|Major facilitator superfamily domain|Major facilitator superfamily domain, general substrate transporter|Sugar transporter, conserved site|Sugar/inositol transporter
	UM591_12088	61.1538	PHI:1562#GzOB002#I1RAH4#Lethal#Gibberella zeae (related: Fusarium graminearum)#Fusarium ear blight#Wheat									hypothetical protein	DNA replication licensing factor mcm4	IPR001208|IPR004039|IPR008047|IPR012340|IPR018525|IPR027417|IPR027925	MCM N-terminal domain|Mini-chromosome maintenance complex protein 4|Mini-chromosome maintenance, DNA-dependent ATPase|Mini-chromosome maintenance, conserved site|Nucleic acid-binding, OB-fold|P-loop containing nucleoside triphosphate hydrolase|Rubredoxin-type fold
	UM591_12317	79.3443	PHI:1582#GzOB022#I1RQ81#Unaffected pathogenicity#Gibberella zeae (related: Fusarium graminearum)#Fusarium ear blight#Wheat									eukaryotic translation initiation factor 2 subunit alpha	Eukaryotic translation initiation factor 2 subunit alpha	IPR003029|IPR011488|IPR012340|IPR022967|IPR024054|IPR024055	Nucleic acid-binding, OB-fold|RNA-binding domain, S1|Ribosomal protein S1, RNA-binding domain|Translation initiation factor 2, alpha subunit|Translation initiation factor 2, alpha subunit, C-terminal|Translation initiation factor 2, alpha subunit, middle domain
	UM591_12557	58.567	PHI:1959#GzZC274#I1RM85#Unaffected pathogenicity#Gibberella zeae (related: Fusarium graminearum)#Fusarium ear blight#Wheat									hypothetical protein	-	IPR001138	Zn(2)-C6 fungal-type DNA-binding domain
	UM591_12603	70.5882	PHI:861#RAS2#I1S095#Reduced virulence#Gibberella zeae (related: Fusarium graminearum)#Fusarium ear blight#Maize									GTPase NRas precursor	Protein ras-2	IPR001806|IPR003578|IPR003579|IPR005225|IPR020849|IPR027417	P-loop containing nucleoside triphosphate hydrolase|Small GTP-binding protein domain|Small GTPase superfamily|Small GTPase superfamily, Rab type|Small GTPase superfamily, Ras type|Small GTPase superfamily, Rho type
	UM591_12609	67.2131	PHI:1214#FGSG_07816#I1RN54#Reduced virulence#Gibberella zeae (related: Fusarium graminearum)#Fusarium ear blight#Wheat									CMGC/DYRK/YAK protein kinase	Serine/threonine-protein kinase ppk15	IPR000719|IPR002290|IPR008271|IPR011009|IPR017441	Protein kinase domain|Protein kinase, ATP binding site|Protein kinase-like domain|Serine/threonine- /dual specificity protein kinase, catalytic domain|Serine/threonine-protein kinase, active site
	UM591_12622	60.4651	PHI:1634#GzWing006#I1RDI9#Unaffected pathogenicity#Gibberella zeae (related: Fusarium graminearum)#Fusarium ear blight#Wheat									hypothetical protein	-	IPR011991|IPR014048	Methylated-DNA-[protein]-cysteine S-methyltransferase, DNA binding|Winged helix-turn-helix DNA-binding domain
	UM591_12639	56.4551	PHI:1268#FGSG_07816#I1RN43#Unaffected pathogenicity#Gibberella zeae (related: Fusarium graminearum)#Fusarium ear blight#Wheat									hypothetical protein	Serine/threonine-protein kinase ppk23	IPR000719|IPR002290|IPR008271|IPR011009	Protein kinase domain|Protein kinase-like domain|Serine/threonine- /dual specificity protein kinase, catalytic domain|Serine/threonine-protein kinase, active site
	UM591_12738	67.0732	PHI:1258#FGSG_10591#I1S5M8#Unaffected pathogenicity#Gibberella zeae (related: Fusarium graminearum)#Fusarium ear blight#Wheat									hypothetical protein	-	IPR000719|IPR002290|IPR008271|IPR011009	Protein kinase domain|Protein kinase-like domain|Serine/threonine- /dual specificity protein kinase, catalytic domain|Serine/threonine-protein kinase, active site
	UM591_13011	54.2857	PHI:1438#GzC2H107#I1SAT3#Unaffected pathogenicity#Gibberella zeae (related: Fusarium graminearum)#Fusarium ear blight#Wheat									-	-	IPR001138|IPR007087|IPR013087|IPR015880	Zinc finger C2H2-type/integrase DNA-binding domain|Zinc finger, C2H2|Zinc finger, C2H2-like|Zn(2)-C6 fungal-type DNA-binding domain
	UM591_13029	61.2527	PHI:1647#GzWing019#I1RWA9#Reduced virulence#Gibberella zeae (related: Fusarium graminearum)#Fusarium ear blight#Wheat									-	-	IPR000219|IPR000591|IPR001180|IPR011991|IPR011993	Citron-like|DEP domain|Dbl homology (DH) domain|Pleckstrin homology-like domain|Winged helix-turn-helix DNA-binding domain
	UM591_13071	54.6196	PHI:1088#FGSG_09759#I1RZC6#Unaffected pathogenicity#Gibberella zeae (related: Fusarium graminearum)#Fusarium ear blight#Wheat									hypothetical protein	-	IPR002524|IPR027469	Cation efflux protein|Cation efflux protein transmembrane domain
	UM591_13207	59.2767	PHI:1167#NPC1#I1RY25#Reduced virulence#Gibberella zeae (related: Fusarium graminearum)#Fusarium ear blight#Wheat									hypothetical protein	-	IPR000731|IPR003392|IPR004765	Niemann-Pick C type protein|Patched|Sterol-sensing domain
	UM591_13456	53.1073	PHI:1745#GzZC060#I1RWX2#Unaffected pathogenicity#Gibberella zeae (related: Fusarium graminearum)#Fusarium ear blight#Wheat									conserved hypothetical protein	-	IPR001138	Zn(2)-C6 fungal-type DNA-binding domain
Vascular wilt	UM591_2028	78.7375	PHI:254#FOW1#BAB85760#Reduced virulence#Fusarium oxysporum#Vascular wilt#Tomato									hypothetical protein	Mitochondrial DNA replication protein YHM2	IPR018108|IPR023395	Mitochondrial carrier domain|Mitochondrial substrate/solute carrier
	UM591_4276	64.0693	PHI:200#ARG1#BAB40769#Reduced virulence#Fusarium oxysporum#Vascular wilt#Tomato									hypothetical protein	Argininosuccinate lyase	IPR000362|IPR008948|IPR009049|IPR020557|IPR022761|IPR024083|IPR029419	Argininosuccinate lyase|Argininosuccinate lyase, C-terminal|Fumarase/histidase, N-terminal|Fumarate lyase family|Fumarate lyase, N-terminal|Fumarate lyase, conserved site|L-Aspartase-like
	UM591_4387	65.1083	PHI:1021#CTF1#ABR12478#Unaffected pathogenicity#Fusarium oxysporum#Vascular wilt#Tomato									hypothetical protein	Cutinase transcription factor 1 alpha	IPR001138|IPR001763|IPR007219	Rhodanese-like domain|Transcription factor domain, fungi|Zn(2)-C6 fungal-type DNA-binding domain
	UM591_5003	68.2243	PHI:181#PGX1#AAK81847#Unaffected pathogenicity#Fusarium oxysporum#Vascular wilt#Tomato	GH28.hmm	extr	high_cysteine						exopolygalacturonase	Exopolygalacturonase X-1	IPR000743|IPR011050|IPR012334	Glycoside hydrolase, family 28|Pectin lyase fold|Pectin lyase fold/virulence factor
	UM591_8130	67.4603	PHI:2280#Velvet protein family#J9MAX2#Reduced virulence#Fusarium oxysporum#Vascular wilt#Apple									hypothetical protein	-	IPR021740	Velvet factor
	UM591_8422	50.547	PHI:2362#XlnR#A8QJI7#Unaffected pathogenicity#Fusarium oxysporum f. sp. lycopersici 4287#Vascular wilt#Tomato									hypothetical protein	-	IPR001138|IPR007219	Transcription factor domain, fungi|Zn(2)-C6 fungal-type DNA-binding domain
	UM591_10606	67.2727	PHI:337#CHS7#AAT77184#Reduced virulence#Fusarium oxysporum#Vascular wilt#Tomato									hypothetical protein	Chitin synthase export chaperone	IPR022057	Chitin synthase III catalytic subunit
	UM591_7563	50.3788	PHI:522#GAS1#AAX78216#Reduced virulence#Fusarium oxysporum#Vascular wilt#Tomato	GH72.hmm	extr	high_cysteine						carbohydrate-binding module family 43 protein	1,3-beta-glucanosyltransferase gel4	IPR004886|IPR012946|IPR013781|IPR017853	Glucanosyltransferase|Glycoside hydrolase, catalytic domain|Glycoside hydrolase, superfamily|X8
	UM591_13306	62.4532	PHI:336#CHS2#AAT77182#Reduced virulence#Fusarium oxysporum#Vascular wilt#Tomato	GT2.hmm								-	-	IPR004834|IPR004835|IPR013616|IPR029044	Chitin synthase|Chitin synthase N-terminal|Fungal chitin synthase|Nucleotide-diphospho-sugar transferases
															High mobility group box domain
Rice Blast	UM591_37	50	PHI:2043#XYL-6#AY124591#Unaffected pathogenicity#Magnaporthe oryzae (related: Magnaporthe grisea)#Rice blast#Rice	CBM1.hmm	extr	high_cysteine				60.1852	Xylanase esterases	endo-1,4-beta-xylanase	Endo-1,4-beta-xylanase	IPR000254|IPR001000|IPR013781|IPR017853	Protein of unknown function DUF307|Sodium/calcium exchanger membrane region
	UM591_104	70.5882	PHI:1063#MNH6#ABB30152#Reduced virulence#Magnaporthe oryzae (related: Magnaporthe grisea)#Rice blast#Rice									High mobility group HMG1/HMG2	Non-histone chromosomal protein 6	IPR009071	Cation-transporting P-type ATPase|Cation-transporting P-type ATPase, C-terminal|Cation-transporting P-type ATPase, N-terminal|Cation-transporting P-type ATPase, subfamily IID|HAD-like domain|P-type ATPase, transmembrane domain|P-type ATPase, A domain|P-type ATPase, cytoplasmic domain N|P-type ATPase, phosphorylation site
	UM591_121	55.7725	PHI:2105#MGG_01381.5#MGG_01381#Unaffected pathogenicity#Magnaporthe oryzae (related: Magnaporthe grisea)#Rice blast#Barley									similar to calcium permease family membrane transporter	-	IPR004837|IPR005185	Regulator of G protein signalling domain|Regulator of G protein signalling superfamily
	UM591_344	54.4583	PHI:2096#MGG_02074.5#MGG_02074#Loss of pathogenicity#Magnaporthe oryzae (related: Magnaporthe grisea)#Rice blast#Barley									sodium p-type	-	IPR001757|IPR004014|IPR006068|IPR006414|IPR008250|IPR018303|IPR023214|IPR023298|IPR023299	Zinc finger, CCHC-type|Zinc knuckle CX2CX4HX4C
	UM591_496	56.9554	PHI:2194#MoRgs3#XP_360603#Reduced virulence#Magnaporthe oryzae (related: Magnaporthe grisea)#Rice blast#Rice									similar to RGS domain protein (Rax1)	-	IPR000342|IPR016137	Calcium/proton exchanger|Calcium/proton exchanger CAX|Sodium/calcium exchanger membrane region
	UM591_522	65.6489	PHI:2189#MoGIS2#EHA58228.1#Reduced virulence#Magnaporthe oryzae (related: Magnaporthe grisea)#Rice blast#Barley									hypothetical protein	-	IPR001878|IPR025836	PX-associated, sorting nexin 13|Phox homologous domain|Phox-associated domain|Regulator of G protein signalling domain|Regulator of G protein signalling superfamily|Sorting nexin, C-terminal
	UM591_783	53.9326	PHI:2101#MGG_11454.5#MGG_11454#Unaffected pathogenicity#Magnaporthe oryzae (related: Magnaporthe grisea)#Rice blast#Barley									hypothetical protein	-	IPR004713|IPR004798|IPR004837	Cation-transporting P-type ATPase|Cation-transporting P-type ATPase, C-terminal|Cation-transporting P-type ATPase, N-terminal|Cation-transporting P-type ATPase, subfamily IID|HAD-like domain|P-type ATPase, transmembrane domain|P-type ATPase, A domain|P-type ATPase, cytoplasmic domain N|P-type ATPase, phosphorylation site
	UM591_1000	52.9504	PHI:2195#MoRgs4#XP_368254#Reduced virulence#Magnaporthe oryzae (related: Magnaporthe grisea)#Rice blast#Rice									conserved hypothetical protein	-	IPR000342|IPR001683|IPR003114|IPR013937|IPR013996|IPR016137	AAA+ ATPase domain|ATPase, AAA-type, conserved site|ATPase, AAA-type, core|Aspartate decarboxylase-like domain|CDC48 domain 2-like|P-loop containing nucleoside triphosphate hydrolase|Peroxisome biogenesis factor 1|Peroxisome biogenesis factor 1, N-terminal
	UM591_1065	64.0977	PHI:2096#MGG_02074.5#MGG_02074#Loss of pathogenicity#Magnaporthe oryzae (related: Magnaporthe grisea)#Rice blast#Barley									similar to sodium P-type ATPase	-	IPR001757|IPR004014|IPR006068|IPR006414|IPR008250|IPR018303|IPR023214|IPR023298|IPR023299	Cation-transporting P-type ATPase, subfamily IV|Cation-transporting P-type ATPase|HAD-like domain|P-type ATPase, A domain|P-type ATPase, cytoplasmic domain N|P-type ATPase, phosphorylation site
	UM591_1560	53.0692	PHI:2177#PAS1#MGG_09299#Unaffected pathogenicity#Magnaporthe oryzae (related: Magnaporthe grisea)#Rice blast#Rice									similar to peroxisome biosynthesis protein (PAS1/Peroxin-1)	-	IPR003593|IPR003959|IPR003960|IPR009010|IPR015342|IPR025653|IPR027417|IPR029067	Autophagy protein Atg8 ubiquitin like|Ubiquitin-related domain
	UM591_2022	63.4933	PHI:2097#Neo1#MGG_04066#Loss of pathogenicity#Magnaporthe oryzae (related: Magnaporthe grisea)#Rice blast#Barley									hypothetical protein	Probable phospholipid-transporting ATPase NEO1	IPR001757|IPR006539|IPR008250|IPR018303|IPR023214|IPR023299	Calcineurin-like phosphoesterase domain, apaH type|Metallo-dependent phosphatase-like|Serine/threonine-specific protein phosphatase/bis(5-nucleosyl)-tetraphosphatase
	UM591_2277	94.8718	PHI:768#ATG8#Q51MW4#Loss of pathogenicity#Magnaporthe oryzae (related: Magnaporthe grisea)#Rice blast#Rice									hypothetical protein	Autophagy-related protein 8	IPR004241|IPR029071	AAA+ ATPase domain|ABC transporter, conserved site|ABC transporter-like|ABC-2 type transporter|ABC-transporter extracellular N-terminal domain|CDR ABC transporter|P-loop containing nucleoside triphosphate hydrolase
	UM591_2609	83.7887	PHI:2110#MGG_07456.5#MGG_07456#Unaffected pathogenicity#Magnaporthe oryzae (related: Magnaporthe grisea)#Rice blast#Barley									hypothetical protein	Serine/threonine-protein phosphatase 2B catalytic subunit	IPR004843|IPR006186|IPR029052	Barwin-like endoglucanase|Cerato-platanin|Major facilitator superfamily|Major facilitator superfamily domain, general substrate transporter|RlpA-like double-psi beta-barrel domain
	UM591_2662	63.0223	PHI:391#ABC2#BAC67162#Unaffected pathogenicity#Magnaporthe oryzae (related: Magnaporthe grisea)#Rice blast#Rice									hypothetical protein	-	IPR003439|IPR003593|IPR010929|IPR013525|IPR017871|IPR027417|IPR029481	EF-Hand 1, calcium-binding site|EF-hand domain|EF-hand domain pair
	UM591_2748	68.9394	PHI:2118#MgSM1#MGG_05344#Effector (plant avirulence determinant)#Magnaporthe oryzae (related: Magnaporthe grisea)#Rice blast#Arabidopsis thaliana									putative l-fucose permease glucose galactose transporter protein	Protein SnodProt1	IPR009009|IPR010829|IPR011701|IPR014733|IPR016196	Phox homologous domain|Vps5 C-terminal
	UM591_3037	92.5287	PHI:2109#CNB#MGG_06933#Reduced virulence#Magnaporthe oryzae (related: Magnaporthe grisea)#Rice blast#Barley									hypothetical protein	Calcineurin subunit B	IPR002048|IPR011992|IPR018247	Mannose-P-dolichol utilization defect 1 protein|PQ-loop repeat
	UM591_3283	58.6449	PHI:2086#Moatg24#MGG_03638#Unaffected pathogenicity#Magnaporthe oryzae (related: Magnaporthe grisea)#Rice blast#Rice									hypothetical protein	Sorting nexin-4	IPR001683|IPR015404	Ribonuclease T2, active site|Ribonuclease T2-like
	UM591_3563	65.8915	PHI:2186#PIC5#EHA49812#Reduced virulence#Magnaporthe oryzae (related: Magnaporthe grisea)#Rice blast#Rice									hypothetical protein	-	IPR006603|IPR016817	Alpha/Beta hydrolase fold|Alpha/beta hydrolase fold-3|Lipase, GDXG, active site
	UM591_3782	58.5443	PHI:811#MGG_10510#EDK06580#Reduced virulence#Magnaporthe oryzae (related: Magnaporthe grisea)#Rice blast#Rice									hypothetical protein	-	IPR001568|IPR018188	Glucose/ribitol dehydrogenase|HotDog domain|MaoC-like domain|NAD(P)-binding domain|Polyketide synthase/Fatty acid synthase, KR|Short-chain dehydrogenase/reductase SDR|Short-chain dehydrogenase/reductase, conserved site
	UM591_4061	50	PHI:2025#HDL1#G4MQZ9#Unaffected pathogenicity#Magnaporthe oryzae (related: Magnaporthe grisea)#Rice blast#Rice	CE10.hmm								hypothetical protein	-	IPR002168|IPR013094|IPR029058	AAA+ ATPase domain|ATPase, AAA-type, conserved site|ATPase, AAA-type, core|P-loop containing nucleoside triphosphate hydrolase
	UM591_4360	71.861	PHI:2034#MFP1#G4MZY1#Reduced virulence#Magnaporthe oryzae (related: Magnaporthe grisea)#Rice blast#Rice									hypothetical protein	Peroxisomal hydratase-dehydrogenase-epimerase	IPR002198|IPR002347|IPR002539|IPR016040|IPR020842|IPR020904|IPR029069	Mitochondrial carrier domain|Mitochondrial carrier protein|Mitochondrial substrate/solute carrier
	UM591_4437	61.8037	PHI:860#MSP1#AAX07670#Reduced virulence#Magnaporthe oryzae (related: Magnaporthe grisea)#Rice blast#Rice									hypothetical protein	-	IPR003593|IPR003959|IPR003960|IPR027417	P-loop containing nucleoside triphosphate hydrolase|Small GTP-binding protein domain|Small GTPase superfamily|Small GTPase superfamily, Rab type|Small GTPase superfamily, Ras type|Small GTPase superfamily, Rho type
	UM591_4706	78.4566	PHI:2038#Mir1#MGG_02370#Unaffected pathogenicity#Magnaporthe oryzae (related: Magnaporthe grisea)#Rice blast#Rice									hypothetical protein	Mitochondrial phosphate carrier protein	IPR002067|IPR018108|IPR023395	EF-Hand 1, calcium-binding site|EF-hand domain|EF-hand domain pair
	UM591_4902	89.8477	PHI:2052#Cdc42#AF250928#Reduced virulence#Magnaporthe oryzae (related: Magnaporthe grisea)#Rice blast#Rice									hypothetical protein	Cell division control protein 42 homolog	IPR001806|IPR003578|IPR003579|IPR005225|IPR020849|IPR027417	Autophagy-related protein 3|Autophagy-related protein 3, C-terminal|Autophagy-related protein 3, N-terminal
	UM591_4935	100	PHI:2108#CAM#MGG_06884#Reduced virulence#Magnaporthe oryzae (related: Magnaporthe grisea)#Rice blast#Barley									calmodulin, partial	Calmodulin	IPR002048|IPR011992|IPR018247	AAA+ ATPase domain|ATPase, AAA-type, conserved site|ATPase, AAA-type, core|P-loop containing nucleoside triphosphate hydrolase
	UM591_4954	62.3229	PHI:2071#Moatg3#MGG_02959#Loss of pathogenicity#Magnaporthe oryzae (related: Magnaporthe grisea)#Rice blast#Rice									similar to TPA: Autophagy-related protein 3 (Autophagy-related E2-like conjugation enzyme atg3)	Autophagy-related protein 3	IPR007134|IPR007135|IPR019461	Alpha/Beta hydrolase fold|Partial AB-hydrolase lipase domain
	UM591_5047	52.467	PHI:593#PEX6#ABG79929#Loss of pathogenicity#Magnaporthe oryzae (related: Magnaporthe grisea)#Rice blast#Barley									peroxin 6	Peroxisomal biogenesis factor 6	IPR003593|IPR003959|IPR003960|IPR027417	3'5'-cyclic nucleotide phosphodiesterase, catalytic domain|3'5'-cyclic nucleotide phosphodiesterase, conserved site|HD/PDEase domain
	UM591_5048	54.0291	PHI:2028#TGL1-2#G4NBI7#Unaffected pathogenicity#Magnaporthe oryzae (related: Magnaporthe grisea)#Rice blast#Rice							74.6858	Gastric lipases	hypothetical protein	-	IPR006693|IPR029058	P-loop containing nucleoside triphosphate hydrolase|Ran GTPase|Small GTP-binding protein domain|Small GTPase superfamily|Small GTPase superfamily, Rab type|Small GTPase superfamily, Ras type|Small GTPase superfamily, Rho type
	UM591_5251	50.5155	PHI:2202#PdeH#GQ869475#Reduced virulence#Magnaporthe oryzae (related: Magnaporthe grisea)#Rice blast#Rice									hypothetical protein	-	IPR002073|IPR003607|IPR023174	P-loop containing nucleoside triphosphate hydrolase|Ran GTPase|Ribosomal protein S27e|Ribosomal protein S27e, zinc-binding domain|Small GTP-binding protein domain|Small GTPase superfamily|Small GTPase superfamily, Rab type|Small GTPase superfamily, Ras type|Small GTPase superfamily, Rho type|Zinc-binding ribosomal protein
	UM591_5527	87	PHI:808#MGG_02731#EDK01822#Reduced virulence#Magnaporthe oryzae (related: Magnaporthe grisea)#Rice blast#Rice									hypothetical protein	Rho-related protein rac1A	IPR001806|IPR002041|IPR003578|IPR003579|IPR005225|IPR020849|IPR027417	Armadillo-like helical|Armadillo-type fold|Protein kinase domain|Protein kinase, ATP binding site|Protein kinase-like domain|Serine/threonine- /dual specificity protein kinase, catalytic domain|Serine/threonine-protein kinase, active site
	UM591_5604	76.0766	PHI:1061#MgRho3#ABK60346#Loss of pathogenicity#Magnaporthe oryzae (related: Magnaporthe grisea)#Rice blast#Rice									hypothetical protein	GTP-binding protein RHO3	IPR000592|IPR001806|IPR002041|IPR003578|IPR003579|IPR005225|IPR011332|IPR020849|IPR023407|IPR027417	Alpha/Beta hydrolase fold|Alpha/beta hydrolase fold-1|Partial AB-hydrolase lipase domain
	UM591_5704	52.1193	PHI:2161#SEP1#MGG_04100#Loss of pathogenicity#Magnaporthe oryzae (related: Magnaporthe grisea)#Rice blast#Rice									hypothetical protein	Cytokinesis protein sepH	IPR000719|IPR002290|IPR008271|IPR011009|IPR011989|IPR016024|IPR017441	Peptidase S8, subtilisin, His-active site|Peptidase S8, subtilisin, Ser-active site|Peptidase S8, subtilisin-related|Peptidase S8/S53 domain|Proteinase inhibitor I9
	UM591_6184	66.1435	PHI:2027#TGL1-1#G4NJL1#Unaffected pathogenicity#Magnaporthe oryzae (related: Magnaporthe grisea)#Rice blast#Rice	CE1.hmm			S33.A57	S230, D399, H425	PLN02872 protein ({Mus musculus}) (Mus musculus)	73.92	Gastric lipases	hypothetical protein	Probable lipase C16A3.12c	IPR000073|IPR006693|IPR029058	FAD-binding 8|Ferredoxin reductase-type FAD-binding domain|Ferric reductase transmembrane component-like domain|Ferric reductase, NAD binding|Riboflavin synthase-like beta-barrel
	UM591_6187	64.1473	PHI:2117#SPM1#P58371#Reduced virulence#Magnaporthe oryzae (related: Magnaporthe grisea)#Rice blast#Rice		cyto		S08.052	D186, H218, N319, S384	cerevisin (Saccharomyces cerevisiae)			hypothetical protein	Subtilisin-like protease CPC735_031240	IPR000209|IPR010259|IPR015500|IPR022398|IPR023828	CAAX prenyl protease 1|Peptidase M48
	UM591_7541	75.485	PHI:859#NOX2#ABS01491#Loss of pathogenicity#Magnaporthe oryzae (related: Magnaporthe grisea)#Rice blast#Rice									hypothetical protein	-	IPR013112|IPR013121|IPR013130|IPR017927|IPR017938	ERG2/sigma1 receptor-like
	UM591_8280	61.7512	PHI:807#MGG_06951#EDJ98115#Reduced virulence#Magnaporthe oryzae (related: Magnaporthe grisea)#Rice blast#Rice				M48.001	E302	Ste24 peptidase (Saccharomyces cerevisiae)			CaaX prenyl protease	-	IPR001915|IPR027057	WD40 repeat|WD40-repeat-containing domain|WD40/YVTN repeat-like-containing domain
	UM591_8487	70	PHI:831#ERG2#CAA80454#chemistry target#Magnaporthe oryzae (related: Magnaporthe grisea)#Rice blast									C-8 sterol isomerase	C-8 sterol isomerase	IPR006716	Chitin synthase|Cytochrome b5-like heme/steroid binding domain|Homeodomain-like|Myosin head, motor domain|Nucleotide-diphospho-sugar transferases|P-loop containing nucleoside triphosphate hydrolase
	UM591_8549	52.5105	PHI:2084#Moatg18#MGG_03139#Reduced virulence#Magnaporthe oryzae (related: Magnaporthe grisea)#Rice blast#Rice									hypothetical protein	Autophagy-related protein 18	IPR001680|IPR015943|IPR017986	Acyltransferase ChoActase/COT/CPT
	UM591_8720	58.7872	PHI:2302#CHS5#JF912408#Loss of pathogenicity#Magnaporthe oryzae (related: Magnaporthe grisea)#Rice blast#Barley	GT2.hmm								chitin synthase 6	Chitin synthase 6	IPR001199|IPR001609|IPR004835|IPR009057|IPR027417|IPR029044	CRIB domain|Pleckstrin homology domain|Pleckstrin homology-like domain|Protein kinase domain|Protein kinase-like domain|Serine/threonine- /dual specificity protein kinase, catalytic domain|Serine/threonine-protein kinase, active site
	UM591_8918	71.6418	PHI:594#CrAT1/PTH2#AAB88887#Loss of pathogenicity#Magnaporthe oryzae (related: Magnaporthe grisea)#Rice blast#Barley									hypothetical protein	-	IPR000542	Domain of unknown function DUF2427|Uncharacterised domain YCR061W, C-terminal
	UM591_9138	55.8824	PHI:519#CHM1#AAL15449#Reduced virulence#Magnaporthe oryzae (related: Magnaporthe grisea)#Rice blast#Rice									similar to serine/threonine-protein kinase CLA4	-	IPR000095|IPR000719|IPR001849|IPR002290|IPR008271|IPR011009|IPR011993	Glycogen/starch/alpha-glucan phosphorylase|Glycosyl transferase, family 35
	UM591_9194	58.7336	PHI:1057#MTP1#ABP98949#Unaffected pathogenicity#Magnaporthe oryzae (related: Magnaporthe grisea)#Rice blast#Rice									hypothetical protein	-	IPR018825|IPR018827	Cation-transporting P-type ATPase|Cation-transporting P-type ATPase, subfamily V|HAD-like domain|P-type ATPase, A domain|P-type ATPase, cytoplasmic domain N|P-type ATPase, phosphorylation site
	UM591_9351	76.5837	PHI:2062#Gph1#XP_363893#Unaffected pathogenicity#Magnaporthe oryzae (related: Magnaporthe grisea)#Rice blast#Barley	GT35.hmm								similar to glycogen phosphorylase	Glycogen phosphorylase	IPR000811|IPR011833	S-adenosylmethionine synthetase|S-adenosylmethionine synthetase superfamily|S-adenosylmethionine synthetase, C-terminal|S-adenosylmethionine synthetase, N-terminal|S-adenosylmethionine synthetase, central domain|S-adenosylmethionine synthetase, conserved site
	UM591_9386	71.374	PHI:2100#Spf1#MGG_12005#Reduced virulence#Magnaporthe oryzae (related: Magnaporthe grisea)#Rice blast#Barley									hypothetical protein	Probable cation-transporting ATPase 1	IPR001757|IPR006544|IPR008250|IPR018303|IPR023214|IPR023299	Molybdenum cofactor biosynthesis, MoeB|NAD(P)-binding domain|UBA/THIF-type NAD/FAD binding fold|Ubiquitin-like modifier-activating enzyme Atg7
	UM591_9759	82.4427	PHI:877#MGG_00383#EDK03005#Reduced virulence#Magnaporthe oryzae (related: Magnaporthe grisea)#Rice blast#Rice									similar to S-adenosylmethionine synthetase	S-adenosylmethionine synthase	IPR002133|IPR022628|IPR022629|IPR022630|IPR022631|IPR022636	SH3 domain
	UM591_10016	55.1582	PHI:2075#Moatg7#MGG_07297#Loss of pathogenicity#Magnaporthe oryzae (related: Magnaporthe grisea)#Rice blast#Rice									hypothetical protein	Ubiquitin-like modifier-activating enzyme atg7	IPR000594|IPR006285|IPR009036|IPR016040	Homeobox domain|Homeobox, conserved site|Homeodomain-like
	UM591_10142	61.0932	PHI:2160#MoSHO1#MGG_09125#Reduced virulence#Magnaporthe oryzae (related: Magnaporthe grisea)#Rice blast#Rice									hypothetical protein	High osmolarity signaling protein sho1	IPR001452	BRCT domain|DNA ligase, ATP-dependent|DNA ligase, ATP-dependent, C-terminal|DNA ligase, ATP-dependent, N-terminal|DNA ligase, ATP-dependent, central|DNA ligase, ATP-dependent, conserved site|Nucleic acid-binding, OB-fold
	UM591_10325	57.6797	PHI:2128#MoHox1#MGG_04853#reduced virulence#Magnaporthe oryzae (related: Magnaporthe grisea)#Rice blast#Rice									hypothetical protein	-	IPR001356|IPR009057|IPR017970	Glutathione peroxidase|Thioredoxin-like fold
	UM591_10436	50.396	PHI:2060#MgLig4#AB353135#Unaffected pathogenicity#Magnaporthe oryzae (related: Magnaporthe grisea)#Rice blast#Rice									hypothetical protein	DNA ligase 4	IPR000977|IPR001357|IPR012308|IPR012309|IPR012310|IPR012340|IPR016059	Exosome complex component CSL4|Exosome complex component, N-terminal domain|Nucleic acid-binding, OB-fold
	UM591_10517	74.5455	PHI:2356#MoHYR1#G4N178#Reduced virulence#Magnaporthe oryzae (related: Magnaporthe grisea)#Rice Blast#Barley									hypothetical protein	Glutathione peroxidase	IPR000889|IPR012336	Alcohol dehydrogenase GroES-like|Alcohol dehydrogenase superfamily, zinc-type|Alcohol dehydrogenase, C-terminal|GroES (chaperonin 10)-like|NAD(P)-binding domain|Polyketide synthase, enoylreductase
	UM591_10535	51.8018	PHI:804#MGG_08628#EDJ94907#Reduced virulence#Magnaporthe oryzae (related: Magnaporthe grisea)#Rice blast#Rice									hypothetical protein	-	IPR012340|IPR019495|IPR025721	Cation-transporting P-type ATPase|Cation-transporting P-type ATPase, C-terminal|Cation-transporting P-type ATPase, N-terminal|Cation-transporting P-type ATPase, subfamily IID|HAD-like domain|P-type ATPase, transmembrane domain|P-type ATPase, A domain|P-type ATPase, cytoplasmic domain N|P-type ATPase, phosphorylation site
	UM591_11018	58.457	PHI:881#MGG_04556#EDJ96020#Reduced virulence#Magnaporthe oryzae (related: Magnaporthe grisea)#Rice blast#Rice									hypothetical protein	-	IPR002085|IPR011032|IPR013149|IPR013154|IPR016040|IPR020843	Cation-transporting P-type ATPase|Cation-transporting P-type ATPase, C-terminal|Cation-transporting P-type ATPase, N-terminal|Cation-transporting P-type ATPase, subfamily IID|HAD-like domain|P-type ATPase, transmembrane domain|P-type ATPase, A domain|P-type ATPase, cytoplasmic domain N|P-type ATPase, phosphorylation site
	UM591_11037	57.4091	PHI:2098#MGG_05078.5#MGG_05078#Loss of pathogenicity#Magnaporthe oryzae (related: Magnaporthe grisea)#Rice blast#Barley									putative potassium sodium efflux p-type atpase protein	-	IPR001757|IPR004014|IPR006068|IPR006414|IPR008250|IPR018303|IPR023214|IPR023298|IPR023299	Polycystin cation channel, PKD1/PKD2
	UM591_12086	67.1963	PHI:2095#MGG_10730.5#MGG_10730#Reduced virulence#Magnaporthe oryzae (related: Magnaporthe grisea)#Rice blast#Barley									hypothetical protein	-	IPR001757|IPR004014|IPR006068|IPR006414|IPR008250|IPR018303|IPR023214|IPR023298|IPR023299	Concanavalin A-like lectin/glucanases superfamily|Glycoside hydrolase, family 11|Glycoside hydrolase, family 11, active site|Glycoside hydrolase, family 11/12
	UM591_12319	59.3168	PHI:2094#Yvc1#MGG_09828#Reduced virulence#Magnaporthe oryzae (related: Magnaporthe grisea)#Rice blast#Barley									hypothetical protein	-	IPR013122	ER lumen protein retaining receptor
	UM591_12490	61.3734	PHI:567#XYL1/XYN22#AAC41683#Unaffected pathogenicity#Magnaporthe oryzae (related: Magnaporthe grisea)#Rice blast#Rice	GH11.hmm	extr							endo-1,4-beta-xylanase I	Endo-1,4-beta-xylanase 22	IPR001137|IPR008985|IPR013319|IPR018208	Cation-transporting P-type ATPase|Cation-transporting P-type ATPase, C-terminal|Cation-transporting P-type ATPase, N-terminal|Cation-transporting P-type ATPase, subfamily IID|HAD-like domain|P-type ATPase, transmembrane domain|P-type ATPase, A domain|P-type ATPase, cytoplasmic domain N|P-type ATPase, phosphorylation site
	UM591_12771	70.9677	PHI:796#MGG_02423#EDJ98620#Reduced virulence#Magnaporthe oryzae (related: Magnaporthe grisea)#Rice blast#Rice									hypothetical protein	ER lumen protein retaining receptor	IPR000133	Zinc/iron permease
	UM591_13093	65.7783	PHI:2096#MGG_02074.5#MGG_02074#Loss of pathogenicity#Magnaporthe oryzae (related: Magnaporthe grisea)#Rice blast#Barley									similar to sodium P-type ATPase	-	IPR001757|IPR004014|IPR006068|IPR006414|IPR008250|IPR018303|IPR023214|IPR023298|IPR023299	Mitochondrial 18kDa protein
	UM591_13198	50.6515	PHI:2107#MGG_05905#MGG_05905#Unaffected pathogenicity#Magnaporthe oryzae (related: Magnaporthe grisea)#Rice blast#Barley									hypothetical protein	-	IPR003689	Glycoside hydrolase, catalytic domain|Glycoside hydrolase, family 10|Glycoside hydrolase, superfamily
	UM591_13311	52.7273	PHI:888#MGG_01707#EDK04578#Reduced virulence#Magnaporthe oryzae (related: Magnaporthe grisea)#Rice blast#Rice									hypothetical protein	-	IPR019560	Six-hairpin glycosidase|Six-hairpin glycosidase-like|Uncharacterised conserved protein UCP028846
	UM591_7944	63.5179	PHI:2204#endo-1,4-beta-xylanase [GH10 family]#MGG_01542#Reduced virulence#Magnaporthe oryzae (related: Magnaporthe grisea)#Rice blast#Barley	GH10.hmm	extr					74.8485	Xylanase esterases	similar to endo-1,4-beta-xylanase A precursor	Endo-1,4-beta-xylanase F3	IPR001000|IPR013781|IPR017853	Chitin synthase|Nucleotide-diphospho-sugar transferases
	UM591_8527	63.6364	PHI:785#MGG_04128#EDJ99431#Reduced virulence#Magnaporthe oryzae (related: Magnaporthe grisea)#Rice blast#Rice	GH125.hmm	extr							hypothetical protein	Meiotically up-regulated gene 157 protein	IPR008313|IPR008928|IPR012341	Alpha/Beta hydrolase fold|Alpha/beta hydrolase fold-3|WD40 repeat|WD40-repeat-containing domain|WD40/YVTN repeat-like-containing domain
	UM591_8712	62.5	PHI:2301#CHS7#EU935590#Reduced virulence#Magnaporthe oryzae (related: Magnaporthe grisea)#Rice blast#Barley	GT2.hmm								hypothetical protein	Chitin synthase D	IPR004835|IPR029044	Protein of unknown function DUF3129
	UM591_9924	59.2814	PHI:2155#MoPEX7#B8Q8Z5#Loss of pathogenicity#Magnaporthe oryzae (related: Magnaporthe grisea)#Rice blast#Rice	CE10.hmm								hypothetical protein	-	IPR001680|IPR013094|IPR015943|IPR017986|IPR029058	Protein of unknown function DUF3129
	UM591_10893	59.4059	PHI:257#GAS2#AAF74764#Reduced virulence#Magnaporthe oryzae (related: Magnaporthe grisea)#Rice blast#Rice		extr							-	-	IPR021476	Alpha/Beta hydrolase fold|Lipase, class 3
	UM591_12230	59.3909	PHI:256#GAS1#AAK52794#Reduced virulence#Magnaporthe oryzae (related: Magnaporthe grisea)#Rice blast#Rice		extr	high_cysteine						-	-	IPR021476
	UM591_12690	55.5932	PHI:2081#Moatg15#MGG_12828#Loss of pathogenicity#Magnaporthe oryzae (related: Magnaporthe grisea)#Rice blast#Rice		extr	high_cysteine						hypothetical protein	Putative lipase ATG15-1	IPR002921|IPR029058
Leaf spot	UM591_380	50.6757	PHI:115#PGX1#AAC26146#Unaffected pathogenicity#Cochliobolus carbonum#Leaf spot#Maize	GH28.hmm	extr	high_cysteine						Glycoside hydrolase family 28	Exopolygalacturonase X	IPR000743|IPR006626|IPR011050|IPR012334	Glycoside hydrolase, family 28|Parallel beta-helix repeat|Pectin lyase fold|Pectin lyase fold/virulence factor
	UM591_384	54.4021	PHI:191#TOM1#AAB08446#Unaffected pathogenicity#Septoria lycopersici#Leaf spot#Tomato	GH3.hmm	extr							beta-glucosidase 2	Probable beta-glucosidase G	IPR001764|IPR002772|IPR017853|IPR026891|IPR026892	Fibronectin type III-like domain|Glycoside hydrolase family 3|Glycoside hydrolase family 3 C-terminal domain|Glycoside hydrolase, family 3, N-terminal|Glycoside hydrolase, superfamily
	UM591_668	52.6825	PHI:97#TOXC#AAC62818#Reduced virulence#Cochliobolus carbonum#Leaf spot#Maize									hypothetical protein	Fatty acid synthase subunit beta	IPR001227|IPR002539|IPR003965|IPR013565|IPR013785|IPR014043|IPR016035|IPR016452|IPR020801|IPR029069	Acyl transferase|Acyl transferase domain|Acyl transferase/acyl hydrolase/lysophospholipase|Aldolase-type TIM barrel|Domain of unknown function DUF1729|Fatty acid synthase|Fatty acid synthase, beta subunit, fungi|HotDog domain|MaoC-like domain|Polyketide synthase, acyl transferase domain
	UM591_1528	64.7604	PHI:296#CZK3#AAP72037#Reduced virulence#Cercospora zeae-maydis#Maize grey leaf spot#Maize									hypothetical protein	-	IPR000719|IPR002290|IPR008271|IPR011009|IPR017240|IPR017441	Mitogen-activated protein (MAP) kinase kinase kinase, SSK22|Protein kinase domain|Protein kinase, ATP binding site|Protein kinase-like domain|Serine/threonine- /dual specificity protein kinase, catalytic domain|Serine/threonine-protein kinase, active site
	UM591_1821	75.0572	PHI:115#PGX1#AAC26146#Unaffected pathogenicity#Cochliobolus carbonum#Leaf spot#Maize	GH28.hmm	extr							glycoside hydrolase family 28 protein	Exopolygalacturonase	IPR000743|IPR006626|IPR011050|IPR012334	Glycoside hydrolase, family 28|Parallel beta-helix repeat|Pectin lyase fold|Pectin lyase fold/virulence factor
	UM591_1864	73.6842	PHI:216#HDC1#AAK35180#Reduced virulence#Cochliobolus carbonum#Leaf spot#Maize									hypothetical protein	Histone deacetylase RPD3	IPR000286|IPR003084|IPR023801	Histone deacetylase|Histone deacetylase domain|Histone deacetylase superfamily
	UM591_2424	59.2275	PHI:1052#PHL1#ACB38886#Unaffected pathogenicity#Cercospora zeae-maydis#Maize grey leaf spot#Maize									hypothetical protein	-	IPR005101|IPR006050|IPR014729	DNA photolyase, FAD-binding/Cryptochrome, C-terminal|DNA photolyase, N-terminal|Rossmann-like alpha/beta/alpha sandwich fold
	UM591_4860	56.7686	PHI:572#XYL2#AAC62815#Unaffected pathogenicity#Cochliobolus carbonum#Leaf spot#Maize	GH11.hmm	extr					50.7853	Xylanase esterases	xylanase	Endo-1,4-beta-xylanase A	IPR001137|IPR008985|IPR013319|IPR018208	Concanavalin A-like lectin/glucanases superfamily|Glycoside hydrolase, family 11|Glycoside hydrolase, family 11, active site|Glycoside hydrolase, family 11/12
	UM591_6640	74.0782	PHI:188#SNF1#AAD43341#Reduced virulence#Cochliobolus carbonum#Leaf spot#Maize									similar to gi|5442424|gb|AAD43341.1|AF159253_1 serine threonine protein kinase SNF1p	Carbon catabolite-derepressing protein kinase	IPR000719|IPR002290|IPR008271|IPR011009|IPR013896|IPR017441|IPR028375	KA1 domain/Ssp2 C-terminal domain|Protein kinase domain|Protein kinase, ATP binding site|Protein kinase-like domain|Serine/threonine- /dual specificity protein kinase, catalytic domain|Serine/threonine-protein kinase, active site|Ubiquitin-associated domain (UBA)
	UM591_8388	72.5664	PHI:571#XYL1#AAA33024#Unaffected pathogenicity#Cochliobolus carbonum#Leaf spot#Maize	GH11.hmm	extr					50.7853	Xylanase esterases	endo-1,4-beta-xylanase I precursor	Endo-1,4-beta-xylanase I	IPR001137|IPR008985|IPR013319|IPR018208	Concanavalin A-like lectin/glucanases superfamily|Glycoside hydrolase, family 11|Glycoside hydrolase, family 11, active site|Glycoside hydrolase, family 11/12
	UM591_8925	53.3512	PHI:3#PGN1#AAA79885#Unaffected pathogenicity#Cochliobolus carbonum#Leaf spot#Maize	GH28.hmm	extr	high_cysteine						putative endopolygalacturonase	Endopolygalacturonase AN8327	IPR000743|IPR006626|IPR011050|IPR012334	Glycoside hydrolase, family 28|Parallel beta-helix repeat|Pectin lyase fold|Pectin lyase fold/virulence factor
	UM591_9494	69.5652	PHI:3#PGN1#AAA79885#Unaffected pathogenicity#Cochliobolus carbonum#Leaf spot#Maize	GH28.hmm	extr							putative endopolygalacturonase protein	Endopolygalacturonase 1	IPR000743|IPR006626|IPR011050|IPR012334	Glycoside hydrolase, family 28|Parallel beta-helix repeat|Pectin lyase fold|Pectin lyase fold/virulence factor
	UM591_10155	77.4011	PHI:143#CHT#AAA33353#Unaffected pathogenicity#Gloeocercospora sorghi#Leaf spot/blight#Sorghum									Nitrilase/cyanide hydratase conserved site	Cyanide hydratase	IPR000132|IPR003010	Carbon-nitrogen hydrolase|Nitrilase/cyanide hydratase, conserved site
	UM591_12291	54.067	PHI:566#cel2#AAK19621#Unaffected pathogenicity#Cochliobolus carbonum#Leaf spot#Maize	GH7.hmm	extr	high_cysteine						hypothetical protein	Endoglucanase EG-1	IPR001722|IPR008985	Concanavalin A-like lectin/glucanases superfamily|Glycoside hydrolase, family 7
Leaf blight	UM591_507	79.7945	PHI:2315#ChLae1#G4XKY9#Reduced virulence#Cochliobolus heterostrophus#Leaf blight#Maize									methyltransferase LaeA	-	IPR029063	S-adenosyl-L-methionine-dependent methyltransferase-like
	UM591_1464	59.3122	PHI:55#PKS1#AAB08104#Reduced virulence#Cochliobolus heterostrophus#Leaf blight#Maize									polyketide synthase	-	IPR001227|IPR006162|IPR009081|IPR011032|IPR013149|IPR013154|IPR013968|IPR014030|IPR014031|IPR014043|IPR016035|IPR016036|IPR016038|IPR016039|IPR016040|IPR020801|IPR020806|IPR020807|IPR020841|IPR020842|IPR020843|IPR029063	Acyl carrier protein-like|Acyl transferase|Acyl transferase domain|Acyl transferase/acyl hydrolase/lysophospholipase|Alcohol dehydrogenase GroES-like|Alcohol dehydrogenase, C-terminal|Beta-ketoacyl synthase, C-terminal|Beta-ketoacyl synthase, N-terminal|GroES (chaperonin 10)-like|Malonyl-CoA ACP transacylase, ACP-binding|NAD(P)-binding domain|Phosphopantetheine attachment site|Polyketide synthase…
	UM591_1472	64.2458	PHI:2425#PKS2#Q6RKG2#Reduced virulence#Cochliobolus heterostrophus#Southern corn leaf blight#Maize									hypothetical protein	-	IPR001227|IPR009081|IPR011032|IPR013968|IPR014030|IPR014031|IPR014043|IPR016035|IPR016036|IPR016038|IPR016039|IPR016040|IPR018201|IPR020801|IPR020806|IPR020807|IPR020841|IPR020842|IPR020843	Acyl carrier protein-like|Acyl transferase|Acyl transferase domain|Acyl transferase/acyl hydrolase/lysophospholipase|Beta-ketoacyl synthase, C-terminal|Beta-ketoacyl synthase, N-terminal|Beta-ketoacyl synthase, active site|GroES (chaperonin 10)-like|Malonyl-CoA ACP transacylase, ACP-binding|NAD(P)-binding domain|Polyketide synthase, KR|Polyketide synthase, acyl transferase domain|Polyketide synth…
	UM591_2502	79.5507	PHI:293#CPS1#AAG53991#Reduced virulence#Cochliobolus heterostrophus#Leaf blight#Maize									hypothetical protein	Uncharacterized protein C56F8.02	IPR000873|IPR010506	AMP-dependent synthetase/ligase|DMAP1-binding
	UM591_8728	96.7509	PHI:2365#Hog1#Q4W6D3#Reduced virulence#Cochliobolus heterostrophus#Southern corn leaf blight#Maize									hog1 protein, partial	Mitogen-activated protein kinase HOG1	IPR000719|IPR002290|IPR008271|IPR008352|IPR011009	Mitogen-activated protein (MAP) kinase, p38|Protein kinase domain|Protein kinase-like domain|Serine/threonine- /dual specificity protein kinase, catalytic domain|Serine/threonine-protein kinase, active site
	UM591_10841	99.3266	PHI:334#CGB1#AAO25585#Loss of pathogenicity#Cochliobolus heterostrophus#Leaf blight#Maize									hypothetical protein	Guanine nucleotide-binding protein subunit beta	IPR001632|IPR001680|IPR015943|IPR016346|IPR017986|IPR019775|IPR020472	G-protein beta WD-40 repeat|G-protein, beta subunit|Guanine nucleotide-binding protein, beta subunit|WD40 repeat|WD40 repeat, conserved site|WD40-repeat-containing domain|WD40/YVTN repeat-like-containing domain
	UM591_12758	60	PHI:2316#ChVel1#G4XKY8#Reduced virulence#Cochliobolus heterostrophus#Leaf blight#Maize									hypothetical protein	-	IPR021740	Velvet factor
Blotches	UM591_32	87.2629	PHI:2255#Abd1#Q0U2A0#Unaffected pathogenicity#Stagonospora nodorum (related: Phaeosphaeria nodorum)#Glume blotch#Wheat									hypothetical protein	L-arabinitol 4-dehydrogenase	IPR002085|IPR011032|IPR013149|IPR013154|IPR016040|IPR020843	Alcohol dehydrogenase GroES-like|Alcohol dehydrogenase superfamily, zinc-type|Alcohol dehydrogenase, C-terminal|GroES (chaperonin 10)-like|NAD(P)-binding domain|Polyketide synthase, enoylreductase
	UM591_487	88.9503	PHI:2256#Xdh1#Q0UA24#Unaffected pathogenicity#Stagonospora nodorum (related: Phaeosphaeria nodorum)#Glume blotch#Wheat									hypothetical protein	Probable D-xylulose reductase A	IPR002085|IPR002328|IPR011032|IPR013149|IPR013154|IPR016040|IPR020843	Alcohol dehydrogenase GroES-like|Alcohol dehydrogenase superfamily, zinc-type|Alcohol dehydrogenase, C-terminal|Alcohol dehydrogenase, zinc-type, conserved site|GroES (chaperonin 10)-like|NAD(P)-binding domain|Polyketide synthase, enoylreductase
	UM591_924	69.1282	PHI:2261#NPS6#G8DNS9#Reduced virulence#Cochliobolus sativus#Spot blotch disease#Barley									hypothetical protein	-	IPR000873|IPR001242|IPR006162|IPR009081|IPR020806|IPR020845	AMP-binding, conserved site|AMP-dependent synthetase/ligase|Acyl carrier protein-like|Condensation domain|Phosphopantetheine attachment site|Polyketide synthase, phosphopantetheine-binding domain
	UM591_1257	51.6129	PHI:413#MPD1#AAT84078#Unaffected pathogenicity#Stagonospora nodorum (related: Phaeosphaeria nodorum)#Glume blotch#Wheat									hypothetical protein	-	IPR002938|IPR003042	Aromatic-ring hydroxylase-like|Monooxygenase, FAD-binding
	UM591_1608	52.5424	PHI:2247#Sch1#EAT82552#Unaffected pathogenicity#Stagonospora nodorum (related: Phaeosphaeria nodorum)#Glume blotch#Wheat									hypothetical protein	-	IPR002198|IPR002347|IPR016040	Glucose/ribitol dehydrogenase|NAD(P)-binding domain|Short-chain dehydrogenase/reductase SDR
	UM591_2880	87.9699	PHI:1100#Mdh1#AAX14688#Unaffected pathogenicity#Stagonospora nodorum (related: Phaeosphaeria nodorum)#Glume blotch#Wheat	GH99.hmm								hypothetical protein	Probable NADP-dependent mannitol dehydrogenase	IPR002198|IPR002347|IPR016040	Glucose/ribitol dehydrogenase|NAD(P)-binding domain|Short-chain dehydrogenase/reductase SDR
	UM591_2970	90.411	PHI:415#IPMDH#F5HCK8#Loss of pathogenicity#Stagonospora nodorum (related: Phaeosphaeria nodorum)#Glume blotch#Wheat									hypothetical protein	3-isopropylmalate dehydrogenase	IPR001804|IPR004429|IPR019818|IPR024084	Isocitrate and isopropylmalate dehydrogenases family|Isocitrate/isopropylmalate dehydrogenase, conserved site|Isopropylmalate dehydrogenase|Isopropylmalate dehydrogenase-like domain
	UM591_3151	57.7206	PHI:2127#MGSTE20p#C6KEF5#Unaffected pathogenicity#Mycosphaerella graminicola (related: Zymoseptoria triticii)#Leaf blotch#Wheat									similar to serine/threonine-protein kinase ste20	-	IPR000095|IPR000719|IPR002290|IPR008271|IPR011009|IPR017441	CRIB domain|Protein kinase domain|Protein kinase, ATP binding site|Protein kinase-like domain|Serine/threonine- /dual specificity protein kinase, catalytic domain|Serine/threonine-protein kinase, active site
	UM591_3383	86.6995	PHI:2271#CpkA#Q00LS5#Unaffected pathogenicity#Stagonospora nodorum (related: Phaeosphaeria nodorum)#Glume blotch#Wheat									similar to calcium/calmodulin-dependent protein kinase	Calcium/calmodulin-dependent protein kinase	IPR000719|IPR002290|IPR008271|IPR011009|IPR017441|IPR020636	Calcium/calmodulin-dependent/calcium-dependent protein kinase|Protein kinase domain|Protein kinase, ATP binding site|Protein kinase-like domain|Serine/threonine- /dual specificity protein kinase, catalytic domain|Serine/threonine-protein kinase, active site
	UM591_4071	85.3265	PHI:2259#AAR1#G8DNT1#Reduced virulence#Cochliobolus sativus#Spot blotch disease#Barley									hypothetical protein	L-aminoadipate-semialdehyde dehydrogenase large subunit	IPR000873|IPR009081|IPR010071|IPR010080|IPR013120|IPR014397|IPR016040|IPR020806|IPR020845|IPR025110	AMP-binding enzyme C-terminal domain|AMP-binding, conserved site|AMP-dependent synthetase/ligase|Acyl carrier protein-like|Amino acid adenylation domain|L-aminoadipate-semialdehyde dehydrogenase, large subunit|Male sterility, NAD-binding|NAD(P)-binding domain|Polyketide synthase, phosphopantetheine-binding domain|Thioester reductase-like domain
	UM591_4461	76.9821	PHI:2270#Mpd1#AY547308#Unaffected pathogenicity#Stagonospora nodorum (related: Phaeosphaeria nodorum)#Glume blotch#Wheat									hypothetical protein	Mannitol-1-phosphate 5-dehydrogenase	IPR000669|IPR008927|IPR013118|IPR013131|IPR013328|IPR016040|IPR023028	6-phosphogluconate dehydrogenase, C-terminal-like|Dehydrogenase, multihelical|Mannitol dehydrogenase|Mannitol dehydrogenase, C-terminal|Mannitol dehydrogenase, N-terminal|Mannitol-1-phosphate 5-dehydrogenase|NAD(P)-binding domain
	UM591_5031	79.0654	PHI:2266#Ptr2#AY187281#Unaffected pathogenicity#Stagonospora nodorum (related: Phaeosphaeria nodorum)#Glume blotch#Wheat									di/tri peptide transporter 2	Peptide transporter PTR2	IPR000109|IPR016196|IPR018456	Major facilitator superfamily domain, general substrate transporter|PTR2 family proton/oligopeptide symporter, conserved site|Proton-dependent oligopeptide transporter family
	UM591_5975	64.7665	PHI:310#MgAtr4#AAK15314#Reduced virulence#Mycosphaerella graminicola (related: Zymoseptoria triticii)#Septoria leaf blotch#Wheat									ABC-2 type transporter	-	IPR003439|IPR003593|IPR010929|IPR013525|IPR017871|IPR027417|IPR029481	AAA+ ATPase domain|ABC transporter, conserved site|ABC transporter-like|ABC-2 type transporter|ABC-transporter extracellular N-terminal domain|CDR ABC transporter|P-loop containing nucleoside triphosphate hydrolase
	UM591_6074	92.081	PHI:365#MLS1#AAS91580#Loss of pathogenicity#Stagonospora nodorum (related: Phaeosphaeria nodorum)#Glume blotch#Wheat									similar to malate synthase	Malate synthase, glyoxysomal	IPR001465|IPR006252|IPR011076|IPR019830	Malate synthase|Malate synthase A|Malate synthase, conserved site|Malate synthase-like
	UM591_6414	65.6652	PHI:1045#MgBcy1#F9WW98#Reduced virulence#Mycosphaerella graminicola (related: Zymoseptoria triticii)#Septoria leaf blotch									cAMP-dependent protein kinase regulatory subunit	cAMP-dependent protein kinase regulatory subunit	IPR000595|IPR002373|IPR003117|IPR012198|IPR014710|IPR018488|IPR018490	Cyclic nucleotide-binding domain|Cyclic nucleotide-binding, conserved site|Cyclic nucleotide-binding-like|Dimerization-anchoring domain of cAMP-dependent protein kinase, regulatory subunit|RmlC-like jelly roll fold|cAMP-dependent protein kinase regulatory subunit|cAMP/cGMP-dependent protein kinase
	UM591_6477	64.7222	PHI:2258#PPT1#G8DNT2#Reduced virulence#Cochliobolus sativus#Spot blotch disease#Barley									hypothetical protein	-	IPR008278	4'-phosphopantetheinyl transferase superfamily
	UM591_7434	94.1772	PHI:2272#CpkB#A9Z1V6#Unaffected pathogenicity#Stagonospora nodorum (related: Phaeosphaeria nodorum)#Glume blotch#Wheat									Ca/Cm-dependent protein kinase B	Calcium/calmodulin-dependent protein kinase type I	IPR000719|IPR002290|IPR008271|IPR011009|IPR017441|IPR020636	Calcium/calmodulin-dependent/calcium-dependent protein kinase|Protein kinase domain|Protein kinase, ATP binding site|Protein kinase-like domain|Serine/threonine- /dual specificity protein kinase, catalytic domain|Serine/threonine-protein kinase, active site
	UM591_7439	69.0867	PHI:413#MPD1#AAT84078#Unaffected pathogenicity#Stagonospora nodorum (related: Phaeosphaeria nodorum)#Glume blotch#Wheat									hypothetical protein	-	IPR002938|IPR003042	Aromatic-ring hydroxylase-like|Monooxygenase, FAD-binding
	UM591_7588	78.2768	PHI:2260#PKS1#G8DNT0#Unaffected pathogenicity#Cochliobolus sativus#Spot blotch disease#Barley									polyketide synthase	-	IPR001031|IPR001227|IPR006162|IPR009081|IPR014030|IPR014031|IPR014043|IPR016035|IPR016036|IPR016038|IPR016039|IPR018201|IPR020801|IPR020806|IPR020841|IPR029058	Acyl carrier protein-like|Acyl transferase|Acyl transferase domain|Acyl transferase/acyl hydrolase/lysophospholipase|Alpha/Beta hydrolase fold|Beta-ketoacyl synthase, C-terminal|Beta-ketoacyl synthase, N-terminal|Beta-ketoacyl synthase, active site|Malonyl-CoA ACP transacylase, ACP-binding|Phosphopantetheine attachment site|Polyketide synthase, acyl transferase domain|Polyketide synthase, beta-ke…
	UM591_7821	84.375	PHI:414#GOX1#AAT73077#Unaffected pathogenicity#Stagonospora nodorum (related: Phaeosphaeria nodorum)#Glume blotch#Wheat									glyoxylase I	Lactoylglutathione lyase	IPR004360|IPR004361|IPR018146|IPR029068	Glyoxalase I|Glyoxalase I, conserved site|Glyoxalase/Bleomycin resistance protein/Dihydroxybiphenyl dioxygenase|Glyoxalase/fosfomycin resistance/dioxygenase domain
	UM591_8156	62.5678	PHI:1161#MgMfs1#A4ZGP3#Sensitive to chemical#Mycosphaerella graminicola (related: Zymoseptoria triticii)#Septoria leaf blotch#Wheat									hypothetical protein	-	IPR001411|IPR011701|IPR016196|IPR020846	Major facilitator superfamily|Major facilitator superfamily domain|Major facilitator superfamily domain, general substrate transporter|Tetracycline resistance protein TetB/drug resistance transporter
	UM591_8244	87.8652	PHI:177#ODC#CAB56523#Reduced virulence#Stagonospora nodorum (related: Phaeosphaeria nodorum)#Glume blotch#Wheat									hypothetical protein	Ornithine decarboxylase	IPR000183|IPR002433|IPR009006|IPR022643|IPR022644|IPR022653|IPR022657|IPR029066	Alanine racemase/group IV decarboxylase, C-terminal|Orn/DAP/Arg decarboxylase 2, C-terminal|Orn/DAP/Arg decarboxylase 2, N-terminal|Orn/DAP/Arg decarboxylase 2, conserved site|Orn/DAP/Arg decarboxylase 2, pyridoxal-phosphate binding site|Ornithine decarboxylase|Ornithine/DAP/Arg decarboxylase|PLP-binding barrel
	UM591_8286	80.9365	PHI:822#Ip#AAB97419#Resistant to chemical#Mycosphaerella graminicola (related: Zymoseptoria triticii)#Septoria leaf blotch#Wheat									succinate dehydrogenase subunit B	Succinate dehydrogenase [ubiquinone] iron-sulfur subunit, mitochondrial	IPR001041|IPR004489|IPR006058|IPR009051|IPR012675|IPR017896|IPR017900|IPR025192	2Fe-2S ferredoxin, iron-sulphur binding site|2Fe-2S ferredoxin-type domain|4Fe-4S ferredoxin, iron-sulphur binding, conserved site|4Fe-4S ferredoxin-type, iron-sulphur binding domain|Alpha-helical ferredoxin|Beta-grasp domain|Succinate dehydogenase/fumarate reductase N-terminal|Succinate dehydrogenase/fumarate reductase iron-sulphur protein
	UM591_8424	78.5479	PHI:2257#Pbl1#Q0UHM8#Unaffected pathogenicity#Stagonospora nodorum (related: Phaeosphaeria nodorum)#Glume blotch#Wheat									-	-	IPR003721|IPR014729	Pantoate-beta-alanine ligase|Rossmann-like alpha/beta/alpha sandwich fold
	UM591_8961	85.9477	PHI:595#ALS1#AAZ95011#Reduced virulence#Stagonospora nodorum (related: Phaeosphaeria nodorum)#Glume blotch#Wheat									similar to 5-aminolevulinate synthase	5-aminolevulinate synthase, mitochondrial	IPR001917|IPR004839|IPR010961|IPR015421|IPR015422|IPR015424	Aminotransferase, class I/classII|Aminotransferase, class-II, pyridoxal-phosphate binding site|Pyridoxal phosphate-dependent transferase|Pyridoxal phosphate-dependent transferase, major region, subdomain 1|Pyridoxal phosphate-dependent transferase, major region, subdomain 2|Tetrapyrrole biosynthesis, 5-aminolevulinic acid synthase
	UM591_9077	63.3333	PHI:1084#CpkC#Q0UGB6#Reduced virulence#Stagonospora nodorum (related: Phaeosphaeria nodorum)#Glume blotch#Wheat									hypothetical protein	-	IPR000719|IPR002290|IPR008271|IPR011009|IPR017441|IPR020636	Calcium/calmodulin-dependent/calcium-dependent protein kinase|Protein kinase domain|Protein kinase, ATP binding site|Protein kinase-like domain|Serine/threonine- /dual specificity protein kinase, catalytic domain|Serine/threonine-protein kinase, active site
	UM591_9399	72.3404	PHI:2336#NIA1#O00101#Unaffected pathogenicity#Stagonospora nodorum (related: Phaeosphaeria nodorum)#Wheat glume blotch disease#Wheat									hypothetical protein	Nitrate reductase [NADPH]	IPR000572|IPR001199|IPR001433|IPR001834|IPR005066|IPR008333|IPR008335|IPR012137|IPR014756|IPR017927|IPR017938|IPR018506|IPR022407	Cytochrome b5, heme-binding site|Cytochrome b5-like heme/steroid binding domain|Eukaryotic molybdopterin oxidoreductase|Ferredoxin reductase-type FAD-binding domain|Immunoglobulin E-set|Moybdenum cofactor oxidoreductase, dimerisation|NADH:cytochrome b5 reductase (CBR)|Nitrate reductase NADH dependent|Oxidoreductase FAD/NAD(P)-binding|Oxidoreductase, FAD-binding domain|Oxidoreductase, molybdopteri…
	UM591_9556	53.9326	PHI:2256#Xdh1#Q0UA24#Unaffected pathogenicity#Stagonospora nodorum (related: Phaeosphaeria nodorum)#Glume blotch#Wheat									putative d-xylulose reductase a protein	Probable D-xylulose reductase A	IPR002085|IPR002328|IPR011032|IPR013149|IPR013154|IPR016040|IPR020843	Alcohol dehydrogenase GroES-like|Alcohol dehydrogenase superfamily, zinc-type|Alcohol dehydrogenase, C-terminal|Alcohol dehydrogenase, zinc-type, conserved site|GroES (chaperonin 10)-like|NAD(P)-binding domain|Polyketide synthase, enoylreductase
	UM591_10022	76.6871	PHI:2263#StuA#Q0U086#Reduced virulence#Stagonospora nodorum (related: Phaeosphaeria nodorum)#Glume blotch#Wheat									hypothetical protein	Cell pattern formation-associated protein stuA	IPR003163	Transcription regulator HTH, APSES-type DNA-binding domain
	UM591_10302	99.4334	PHI:2250#Gna1#AY327542#Reduced virulence#Stagonospora nodorum (related: Phaeosphaeria nodorum)#Glume blotch#Wheat									G protein alpha subunit	Guanine nucleotide-binding protein subunit alpha	IPR001019|IPR002975|IPR011025|IPR027417	Fungal G-protein, alpha subunit|G protein alpha subunit, helical insertion|Guanine nucleotide binding protein (G-protein), alpha subunit|P-loop containing nucleoside triphosphate hydrolase
	UM591_11082	57.6923	PHI:1120#Gna4#Q0UQ06#Unaffected pathogenicity#Stagonospora nodorum (related: Phaeosphaeria nodorum)#Glume blotch#Tomato									similar to guanine nucleotide-binding protein alpha-3 subunit	-	IPR001019|IPR011025|IPR027417	G protein alpha subunit, helical insertion|Guanine nucleotide binding protein (G-protein), alpha subunit|P-loop containing nucleoside triphosphate hydrolase
	UM591_6397	65.9436	PHI:2124#MGSTE7p#C5MK57#Loss of pathogenicity#Mycosphaerella graminicola (related: Zymoseptoria triticii)#Leaf blotch#Wheat	GH13.hmm								dual specificity mitogen-activated protein kinase kinase 2	Alpha-amylase A type-3	IPR000719|IPR002290|IPR006047|IPR006589|IPR008271|IPR011009|IPR013780|IPR013781|IPR015340|IPR015902|IPR017441|IPR017853	Alpha-amylase, domain of unknown function DUF1966, C-terminal|Glycoside hydrolase, catalytic domain|Glycoside hydrolase, family 13|Glycoside hydrolase, superfamily|Glycosyl hydrolase, family 13, all-beta|Glycosyl hydrolase, family 13, catalytic domain|Glycosyl hydrolase, family 13, subfamily, catalytic domain|Protein kinase domain|Protein kinase, ATP binding site|Protein kinase-like domain|Serine…
	UM591_8597	54.5861	PHI:2441#MgAlg2#F9XJV5#Loss of pathogenicity#Mycosphaerella graminicola (related: Zymoseptoria triticii)#Leaf blotch#Wheat	GT4.hmm								similar to alpha-1,3-mannosyltransferase ALG2	Alpha-1,3/1,6-mannosyltransferase alg-2	IPR001296|IPR027054|IPR028098	Alpha-1,3/1,6-mannosyltransferase ALG2|Glycosyl transferase, family 1|Glycosyltransferase subfamily 4, N-terminal domain
Grey mold rot	UM591_452	61.9965	PHI:1025#bcnoxR#CAP12326#Reduced virulence#Botrytis cinerea#Grey mold rot#Bean									hypothetical protein	-	IPR000270|IPR011990|IPR013026|IPR019734	Phox/Bem1p|Tetratricopeptide repeat|Tetratricopeptide repeat-containing domain|Tetratricopeptide-like helical
	UM591_1965	64.3478	PHI:277#BCP1#AAQ16572#Reduced virulence#Botrytis cinerea#Grey mold rot#Tomato									cyclophilin 1 long isoform	Peptidyl-prolyl cis-trans isomerase, mitochondrial	IPR002130|IPR020892|IPR029000	Cyclophilin-like domain|Cyclophilin-type peptidyl-prolyl cis-trans isomerase domain|Cyclophilin-type peptidyl-prolyl cis-trans isomerase, conserved site
	UM591_4146	50.1672	PHI:547#CEL5A#AAT40313#Unaffected pathogenicity#Botrytis cinerea#Grey mold rot#Tomato	GH5.hmm	extr							endo-beta-1,4-glucanase	Endoglucanase 3	IPR001547|IPR013781|IPR017853	Glycoside hydrolase, catalytic domain|Glycoside hydrolase, family 5|Glycoside hydrolase, superfamily
	UM591_4332	50.4464	PHI:329#BcPLS1#CAD43406#Loss of pathogenicity#Botrytis cinerea#Grey mold rot#Tomato									hypothetical protein	-	IPR018499	Tetraspanin/Peripherin
	UM591_4417	50	PHI:548#BcPIC5#ABA25866#Reduced virulence#Botrytis cinerea#Grey mold rot#Tomato									similar to FKBP-type peptidyl-prolyl isomerase	Peptidyl-prolyl cis-trans isomerase	IPR001179|IPR023566	Peptidyl-prolyl cis-trans isomerase, FKBP-type|Peptidyl-prolyl cis-trans isomerase, FKBP-type, domain
	UM591_5627	50.8197	PHI:547#CEL5A#AAT40313#Unaffected pathogenicity#Botrytis cinerea#Grey mold rot#Tomato	GH5.hmm	extr							hypothetical protein	Probable endo-beta-1,4-glucanase B	IPR001547|IPR013781|IPR017853	Glycoside hydrolase, catalytic domain|Glycoside hydrolase, family 5|Glycoside hydrolase, superfamily
	UM591_5956	53.2951	PHI:278#BCPME1#CAC29255#Unaffected pathogenicity#Botrytis cinerea#Grey mold rot#Tomato	CE8.hmm	extr							pectin methylesterase	Pectinesterase	IPR000070|IPR011050|IPR012334|IPR018040	Pectin lyase fold|Pectin lyase fold/virulence factor|Pectinesterase, active site|Pectinesterase, catalytic
	UM591_6101	67.1769	PHI:2295#BcFRP1#A6SB12#Unaffected pathogenicity#Botrytis cinerea#Grey mold rot#Bean				C44.A01	C2	At2g16570 ({Arabidopsis thaliana}) (Arabidopsis thaliana)			hypothetical protein	Amidophosphoribosyltransferase	IPR000836|IPR005854|IPR017932|IPR029055|IPR029057	Amidophosphoribosyl transferase|Glutamine amidotransferase type 2 domain|Nucleophile aminohydrolases, N-terminal|Phosphoribosyltransferase domain|Phosphoribosyltransferase-like
	UM591_6328	84.4156	PHI:330#BcSOD1#CAD88591#Reduced virulence#Botrytis cinerea#Grey mold rot#Bean									Cu/Zn superoxide dismutase	Superoxide dismutase [Cu-Zn]	IPR001424|IPR018152	Superoxide dismutase, copper/zinc binding domain|Superoxide dismutase, copper/zinc, binding site
	UM591_7080	66.9004	PHI:2309#BcatrB#Q9UW03#Reduced virulence#Botrytis cinerea#Grey mold rot#Arabidopsis thaliana									ABC transporter	-	IPR003439|IPR003593|IPR010929|IPR013525|IPR017871|IPR027417	AAA+ ATPase domain|ABC transporter, conserved site|ABC transporter-like|ABC-2 type transporter|CDR ABC transporter|P-loop containing nucleoside triphosphate hydrolase
	UM591_7762	52.7668	PHI:544#BCMFS1#AAF64435#Unaffected pathogenicity#Botrytis cinerea#Grey mold rot#Tomato									hypothetical protein	-	IPR001411|IPR011701|IPR016196|IPR020846	Major facilitator superfamily|Major facilitator superfamily domain|Major facilitator superfamily domain, general substrate transporter|Tetracycline resistance protein TetB/drug resistance transporter
	UM591_8155	65.5013	PHI:1030#bcatrA#CAA93142#Unaffected pathogenicity#Botrytis cinerea#Grey mold rot									ABC drug exporter AtrF	-	IPR003439|IPR003593|IPR010929|IPR013525|IPR017871|IPR027417|IPR029481	AAA+ ATPase domain|ABC transporter, conserved site|ABC transporter-like|ABC-2 type transporter|ABC-transporter extracellular N-terminal domain|CDR ABC transporter|P-loop containing nucleoside triphosphate hydrolase
	UM591_8731	84.7887	PHI:574#BCG3#BAD93277#Reduced virulence#Botrytis cinerea#Grey mold rot#Tomato									putative guanine nucleotide-binding protein alpha-3 subunit protein	Guanine nucleotide-binding protein alpha-3 subunit	IPR001019|IPR002975|IPR011025|IPR027417	Fungal G-protein, alpha subunit|G protein alpha subunit, helical insertion|Guanine nucleotide binding protein (G-protein), alpha subunit|P-loop containing nucleoside triphosphate hydrolase
	UM591_9224	66.8113	PHI:2309#BcatrB#Q9UW03#Reduced virulence#Botrytis cinerea#Grey mold rot#Arabidopsis thaliana									multidrug resistance protein CDR2	-	IPR003439|IPR003593|IPR010929|IPR013525|IPR017871|IPR027417|IPR029481	AAA+ ATPase domain|ABC transporter, conserved site|ABC transporter-like|ABC-2 type transporter|ABC-transporter extracellular N-terminal domain|CDR ABC transporter|P-loop containing nucleoside triphosphate hydrolase
	UM591_9536	62.6527	PHI:538#FRT1#AAU87358#Unaffected pathogenicity#Botrytis cinerea#Grey mold rot#Tomato									hypothetical protein	-	IPR003663|IPR005828|IPR005829|IPR016196|IPR020846	General substrate transporter|Major facilitator superfamily domain|Major facilitator superfamily domain, general substrate transporter|Sugar transporter, conserved site|Sugar/inositol transporter
	UM591_9639	62.973	PHI:542#BCCAT2#AAK77951#Unaffected pathogenicity#Botrytis cinerea#Grey mold rot#Bean		extr							similar to catalase	Catalase B	IPR002226|IPR010582|IPR011614|IPR018028|IPR020835|IPR024708|IPR024712|IPR029062	Catalase active site|Catalase core domain|Catalase haem-binding site|Catalase immune-responsive domain|Catalase, mono-functional, haem-containing|Catalase, mono-functional, haem-containing, clade 2|Catalase-like domain|Class I glutamine amidotransferase-like
	UM591_9749	78.4047	PHI:650#TPS1#ABG25558#Unaffected pathogenicity#Botrytis cinerea#Grey mold rot#Tomato	GT20.hmm								glycosyltransferase family 20 protein	Alpha,alpha-trehalose-phosphate synthase [UDP-forming] 1	IPR001830|IPR012766	Alpha,alpha-trehalose-phosphate synthase|Glycosyl transferase, family 20
	UM591_9817	53.116	PHI:240#BAC#CAB77164#Reduced virulence#Botrytis cinerea#Grey mold rot#Bean									hypothetical protein	-	IPR000159|IPR001054|IPR001611|IPR001932|IPR003591|IPR013716|IPR025875	Adenylate cyclase G-alpha binding|Adenylyl cyclase class-3/4/guanylyl cyclase|Leucine rich repeat 4|Leucine-rich repeat|Leucine-rich repeat, typical subtype|Protein phosphatase 2C (PP2C)-like domain|Ras-association
	UM591_10486	64	PHI:541#LIP1#AAU87359#Unaffected pathogenicity#Botrytis cinerea#Grey mold rot#Bean	CE10.hmm	extr					71.2766	Candida rugosa lipase like	hypothetical protein	-	IPR002018|IPR019826|IPR029058	Alpha/Beta hydrolase fold|Carboxylesterase type B, active site|Carboxylesterase, type B
	UM591_11079	55.7971	PHI:2304#BCFHG1#CAP74387#Unaffected pathogenicity#Botrytis cinerea#Grey mold rot#Tomato									flavohemoprotein	-	IPR000971|IPR001433|IPR008333|IPR009050|IPR012292|IPR017927|IPR017938	Ferredoxin reductase-type FAD-binding domain|Globin|Globin, structural domain|Globin-like|Oxidoreductase FAD/NAD(P)-binding|Oxidoreductase, FAD-binding domain|Riboflavin synthase-like beta-barrel
	UM591_11086	63.2555	PHI:543#BCATRD#CAC41639#Unaffected pathogenicity#Botrytis cinerea#Grey mold rot#Tomato									hypothetical protein	ABC transporter CDR4	IPR003439|IPR003593|IPR010929|IPR013525|IPR017871|IPR027417|IPR029481	AAA+ ATPase domain|ABC transporter, conserved site|ABC transporter-like|ABC-2 type transporter|ABC-transporter extracellular N-terminal domain|CDR ABC transporter|P-loop containing nucleoside triphosphate hydrolase
	UM591_11532	67.6902	PHI:543#BCATRD#CAC41639#Unaffected pathogenicity#Botrytis cinerea#Grey mold rot#Tomato									-	-	IPR003439|IPR003593|IPR010929|IPR013525|IPR017871|IPR027417|IPR029481	AAA+ ATPase domain|ABC transporter, conserved site|ABC transporter-like|ABC-2 type transporter|ABC-transporter extracellular N-terminal domain|CDR ABC transporter|P-loop containing nucleoside triphosphate hydrolase
	UM591_24	64.2674	PHI:2483#BcCCC2#A6SEF3#Loss of pathogenicity#Botrytis cinerea#Grey mould fungus#Tomato									hypothetical protein	-	IPR001757|IPR006121|IPR006122|IPR008250|IPR018303|IPR023214|IPR023299|IPR027256	Cation-transporting P-type ATPase|Cation-transporting P-type ATPase, subfamily IB|HAD-like domain|Heavy metal-associated domain, HMA|Heavy metal-associated domain, copper ion-binding|P-type ATPase, A domain|P-type ATPase, cytoplasmic domain N|P-type ATPase, phosphorylation site
	UM591_1950	55	PHI:741#BeNEP2#ABB43267#Unaffected pathogenicity#Botrytis elliptica#Grey mould#Lily		extr							hypothetical protein	-	IPR008701	Necrosis inducing protein
	UM591_1968	56.0166	PHI:2341#BeNEP1#Q0E7H5#Unaffected pathogenicity#Botrytis elliptica#Grey mould#Lily		extr							hypothetical protein	-	IPR008701	Necrosis inducing protein
	UM591_3101	54.9206	PHI:2319#bos5#A6S644#Loss of pathogenicity#Botrytis cinerea#Grey mould#Cucumber									Pbs2-type MAP kinase kinase	-	IPR000719|IPR002290|IPR008271|IPR011009	Protein kinase domain|Protein kinase-like domain|Serine/threonine- /dual specificity protein kinase, catalytic domain|Serine/threonine-protein kinase, active site
	UM591_4581	60.4545	PHI:740#BeNEP1#ABB43265#Unaffected pathogenicity#Botrytis elliptica#Grey mould#Lily		extr							putative necrosis- and ethylene-inducing protein 1 precursor protein	-	IPR008701	Necrosis inducing protein
	UM591_9851	65.5345	PHI:2334#BcNma#E2GL14#Reduced virulence#Botrytis cinerea#Grey mould#Bean									hypothetical protein	Pro-apoptotic serine protease NMA111	IPR001478|IPR001940|IPR009003|IPR025926	PDZ domain|PDZ-like domain|Peptidase S1C|Trypsin-like cysteine/serine peptidase domain
	UM591_13026	64.8199	PHI:2369#bcpka2#A6S414#Unaffected pathogenicity#Botrytis cinerea#Gray mold#Bean									hypothetical protein	cAMP-dependent protein kinase catalytic subunit alpha	IPR000719|IPR000961|IPR002290|IPR008271|IPR011009|IPR017441	AGC-kinase, C-terminal|Protein kinase domain|Protein kinase, ATP binding site|Protein kinase-like domain|Serine/threonine- /dual specificity protein kinase, catalytic domain|Serine/threonine-protein kinase, active site
Smut diseases	UM591_755	54.4814	PHI:465#KIN2#AAB63337#Reduced virulence#Ustilago maydis#Corn smut#Maize									hypothetical protein	Kinesin heavy chain	IPR001752|IPR019821|IPR027417|IPR027640	Kinesin, motor domain|Kinesin, motor region, conserved site|Kinesin-like protein|P-loop containing nucleoside triphosphate hydrolase
	UM591_898	75.7188	PHI:2241#Rak1#um10146#reduced virulence#Ustilago maydis#Corn smut#Maize									hypothetical protein	Guanine nucleotide-binding protein subunit beta-like protein	IPR001680|IPR015943|IPR017986|IPR019775|IPR020472	G-protein beta WD-40 repeat|WD40 repeat|WD40 repeat, conserved site|WD40-repeat-containing domain|WD40/YVTN repeat-like-containing domain
	UM591_5399	51.107	PHI:346#CRU1#AAN10186#Reduced virulence#Ustilago maydis#Corn smut#Maize									hypothetical protein	-	IPR001680|IPR015943|IPR017986|IPR019775	WD40 repeat|WD40 repeat, conserved site|WD40-repeat-containing domain|WD40/YVTN repeat-like-containing domain
	UM591_9516	53.2228	PHI:903#um01888#Q4PDC5#Unaffected pathogenicity#Ustilago maydis#Corn smut#Maize		extr		S10.014	S211, D419, H488	carboxypeptidase O (Aspergillus saitoi)			carboxypeptidase cpdS precursor	-	IPR001563|IPR018202|IPR029058	Alpha/Beta hydrolase fold|Peptidase S10, serine carboxypeptidase|Peptidase S10, serine carboxypeptidase, active site
	UM591_10146	73.9377	PHI:1117#sep3#4P8W4#Reduced virulence#Ustilago maydis#Corn smut#Maize									neuronal-specific septin-3	Septin homolog spn3	IPR000038|IPR016491|IPR027417	Cell division protein GTP binding|P-loop containing nucleoside triphosphate hydrolase|Septin
	UM591_11610	57.0423	PHI:2382#Upa2#Q6QIY0#Unaffected pathogenicity#Ustilago maydis#Maize smut disease#Maize									similar to Ser/Thr protein phosphatase catalytic subunit	Putative serine/threonine-protein phosphatase C22H10.04	IPR004843|IPR006186|IPR029052	Calcineurin-like phosphoesterase domain, apaH type|Metallo-dependent phosphatase-like|Serine/threonine-specific protein phosphatase/bis(5-nucleosyl)-tetraphosphatase
	UM591_11624	88.1188	PHI:2382#Upa2#Q6QIY0#Unaffected pathogenicity#Ustilago maydis#Maize smut disease#Maize									similar to serine/threonine protein phosphatase 2A catalytic subunit	Serine/threonine-protein phosphatase PP2A catalytic subunit	IPR004843|IPR006186|IPR029052	Calcineurin-like phosphoesterase domain, apaH type|Metallo-dependent phosphatase-like|Serine/threonine-specific protein phosphatase/bis(5-nucleosyl)-tetraphosphatase
															FAD-binding 8|Ferredoxin reductase-type FAD-binding domain|Ferric reductase transmembrane component-like domain|Ferric reductase, NAD binding|Riboflavin synthase-like beta-barrel
Spot disease	UM591_6979	55.142	PHI:2296#tmpL#ABW87261.1#Reduced virulence#Alternaria brassicicola#Black spot#Cabbage							64.9855	Moraxella lipase 3 like	hypothetical protein	-	IPR000873|IPR010071	Basic-leucine zipper domain|Transcription factor PAP1|Yap1 redox domain
	UM591_489	92.3225	PHI:2449#AaNoxA#H9AWW9#Reduced virulence#Alternaria alternata#Citrus brown spots									hypothetical protein	-	IPR013112|IPR013121|IPR013130|IPR017927|IPR017938	Zinc finger C2H2-type/integrase DNA-binding domain|Zinc finger, C2H2|Zinc finger, C2H2-like
	UM591_872	68.845	PHI:2373#YAP1#B9V258#Loss of pathogenicity#Alternaria alternata#Citrus brown spot									hypothetical protein	-	IPR004827|IPR013910|IPR023167	AGC-kinase, C-terminal|Protein kinase domain|Protein kinase, ATP binding site|Protein kinase-like domain|Serine/threonine- /dual specificity protein kinase, catalytic domain|Serine/threonine-protein kinase, active site
	UM591_2136	75.8333	PHI:2505#AbPacC#AB04090.1#Loss of pathogenicity#Alternaria brassicicola#Black spot disease#Cabbage									pacC	-	IPR007087|IPR013087|IPR015880	SET domain|Zinc finger, MYND-type
	UM591_4872	77.4554	PHI:2317#aapk1#B0LW64#Reduced virulence#Alternaria alternata#Brown spot disease#Tobacco									hypothetical protein	cAMP-dependent protein kinase type 2	IPR000719|IPR000961|IPR002290|IPR008271|IPR011009|IPR017441	CheY-like superfamily|HAMP linker domain|Helicase, C-terminal|Helicase, superfamily 1/2, ATP-binding domain|Histidine kinase-like ATPase, ATP-binding domain|P-loop containing nucleoside triphosphate hydrolase|SNF2-related|Signal transduction histidine kinase EnvZ-like, dimerisation/phosphoacceptor domain|Signal transduction histidine kinase, core|Signal transduction histidine kinase, homodimeric …
	UM591_5994	67.5	PHI:2507#AbVf8#AB10176.1#Reduced virulence#Alternaria brassicicola#Black spot disease#Cabbage									-	-	IPR001214|IPR002893	Transcription factor domain, fungi|Zinc finger C2H2-type/integrase DNA-binding domain|Zinc finger, C2H2|Zinc finger, C2H2-like|Zn(2)-C6 fungal-type DNA-binding domain
	UM591_6900	85.8333	PHI:2482#AlHK1#Q09JB7#Increased virulence (Hypervirulence)#Alternaria longipes#Brown spot disease#Tobacco									two-component histidine kinase	-	IPR000330|IPR001650|IPR001789|IPR001841|IPR003594|IPR003660|IPR003661|IPR004358|IPR005467|IPR009082|IPR011006|IPR013083|IPR014001|IPR027417	O-methyltransferase, family 2|S-adenosyl-L-methionine-dependent methyltransferase-like|Winged helix-turn-helix DNA-binding domain
	UM591_7585	76.9009	PHI:2506#Amr1#G3F820#Increased virulence (Hypervirulence)#Alternaria brassicicola#Black spot disease#Cabbage									hypothetical protein	-	IPR001138|IPR007087|IPR007219|IPR013087|IPR015880	CO dehydrogenase flavoprotein-like, FAD-binding, subdomain 2|FAD linked oxidase, N-terminal|FAD-binding, type 2
	UM591_7763	53.3854	PHI:1049#CTB2#ABK64180#Reduced virulence#Cercospora nicotianae#Frog-eye leafspot									hypothetical protein	-	IPR001077|IPR011991|IPR029063	Protein of unknown function DUF3468|Zn(2)-C6 fungal-type DNA-binding domain
	UM591_7765	58.231	PHI:1046#CTB5#ABK64182#Reduced virulence#Cercospora nicotianae#Frog-eye leafspot									FAD binding domain-containing protein	-	IPR006094|IPR016166|IPR016169	Transcription factor, STE-like|Zinc finger C2H2-type/integrase DNA-binding domain|Zinc finger, C2H2|Zinc finger, C2H2-like
	UM591_8188	72	PHI:2286#AbPro1#AB07871.1#Reduced virulence#Alternaria brassicicola#Black spot#Cabbage									hypothetical protein	Transcriptional regulatory protein pro-1	IPR001138|IPR021858	Mitogen-activated protein (MAP) kinase, conserved site|Protein kinase domain|Protein kinase, ATP binding site|Protein kinase-like domain|Serine/threonine- /dual specificity protein kinase, catalytic domain|Serine/threonine-protein kinase, active site
	UM591_9026	80.8908	PHI:2287#AbSte12#AB09132.1#Loss of pathogenicity#Alternaria brassicicola#Black spot#Cabbage									transcription factor steA	Transcription factor steA	IPR003120|IPR007087|IPR013087|IPR015880
	UM591_12563	99.1429	PHI:736#AMK1#AAS20192#Loss of pathogenicity#Alternaria brassicicola#Black spot#Brassica oleracea									protein kinase	Mitogen-activated protein kinase	IPR000719|IPR002290|IPR003527|IPR008271|IPR011009|IPR017441	Alpha/Beta hydrolase fold|Cutinase|Cutinase, monofunctional
															Pectate lyase, catalytic|Pectin lyase fold|Pectin lyase fold/virulence factor
Rot	UM591_2724	52.3529	PHI:2383#MfCUT1#Q2VF46#Increased virulence (hypervirulence)#Monilinia fructicola#Brown rot#Almond	CE5.hmm	extr					61.0256	Cutinases	hypothetical protein	Cutinase	IPR000675|IPR011150|IPR029058	Alpha/Beta hydrolase fold|Cutinase|Cutinase, monofunctional
	UM591_6291	59.1489	PHI:180#PELD#AAC49420#Reduced virulence#Nectria haematococca (related: Fusarium solani)#Root rot#Pea	PL3.hmm	extr	high_cysteine						hypothetical protein	Probable pectate lyase F	IPR004898|IPR011050|IPR012334	Pectate lyase, catalytic|Pectin lyase fold|Pectin lyase fold/virulence factor
	UM591_6311	50.8876	PHI:2383#MfCUT1#Q2VF46#Increased virulence (hypervirulence)#Monilinia fructicola#Brown rot#Almond	CE5.hmm	extr					59.1837	Cutinases	cutinase precursor	-	IPR000675|IPR011150|IPR029058	Alpha/Beta hydrolase fold|Cutinase
	UM591_6450	53.5211	PHI:179#PELA#AAA33338#Reduced virulence#Nectria haematococca (related: Fusarium solani)#Root rot#Pea	PL3.hmm	extr							Pectate lyase catalytic	Probable pectate lyase D	IPR004898|IPR011050|IPR012334	Gamma-glutamyltranspeptidase|Nucleophile aminohydrolases, N-terminal
	UM591_7102	52.6946	PHI:2383#MfCUT1#Q2VF46#Increased virulence (hypervirulence)#Monilinia fructicola#Brown rot#Almond	CE5.hmm	extr	high_cysteine				50.5556	Cutinases	carbohydrate esterase family 5 protein	Cutinase	IPR000675|IPR029058	Pectate lyase, catalytic|Pectin lyase fold|Pectin lyase fold/virulence factor
	UM591_8185	55.5556	PHI:2411#Ss-ggt1#A7F946#Reduced virulence#Sclerotinia sclerotiorum#White mold/stem rot#Tomato		extr		T03.006	T390	gamma-glutamyltransferase 1 (mammalian-type) (Homo sapiens)			similar to gamma-glutamyltranspeptidase	-	IPR000101|IPR029055	AAA+ ATPase domain|ABC transporter-like|ABC-2 type transporter|ABC-transporter extracellular N-terminal domain|CDR ABC transporter|P-loop containing nucleoside triphosphate hydrolase
	UM591_11210	62.0408	PHI:179#PELA#AAA33338#Reduced virulence#Nectria haematococca (related: Fusarium solani)#Root rot#Pea	PL3.hmm	extr	high_cysteine						hypothetical protein	-	IPR004898|IPR011050|IPR012334	Aromatic-ring hydroxylase-like|Monooxygenase, FAD-binding
	UM591_1332	54.141	PHI:258#GPABC1#CAC40023#Reduced virulence#Gibberella pulicaris#Potato rot#Potato									hypothetical protein	-	IPR003439|IPR003593|IPR010929|IPR013525|IPR027417|IPR029481	Chitin synthase|Chitin synthase N-terminal|Fungal chitin synthase|Nucleotide-diphospho-sugar transferases
	UM591_5622	50.9934	PHI:112#MAK1#AAC49410#Reduced virulence#Nectria haematococca (related: Fusarium solani)#Root rot#Chickpea									hypothetical protein	-	IPR002938|IPR003042	AAA+ ATPase domain|ABC transporter, conserved site|ABC transporter-like|ABC-2 type transporter|ABC-transporter extracellular N-terminal domain|CDR ABC transporter|P-loop containing nucleoside triphosphate hydrolase
	UM591_11753	68.6404	PHI:1055#CgCHSIII#AAL23718#Unaffected pathogenicity#Colletotrichum graminicola#Maize leaf anthracnose / stalk rot#Maize	GT2.hmm								glycosyltransferase family 2	Chitin synthase 1	IPR004834|IPR004835|IPR013616|IPR029044
	UM591_13181	52.2306	PHI:258#GPABC1#CAC40023#Reduced virulence#Gibberella pulicaris#Potato rot#Potato									ABC multidrug transporter	-	IPR003439|IPR003593|IPR010929|IPR013525|IPR017871|IPR027417|IPR029481	Thiolase|Thiolase, C-terminal|Thiolase, N-terminal|Thiolase, acyl-enzyme intermediate active site|Thiolase-like|Thiolase-like, subgroup
															Thiolase|Thiolase, C-terminal|Thiolase, N-terminal|Thiolase, acyl-enzyme intermediate active site|Thiolase, conserved site|Thiolase-like|Thiolase-like, subgroup
Phoma stem canker	UM591_146	54.7425	PHI:598#THIOL#ABB55459#Reduced virulence#Leptosphaeria maculans#Phoma stem canker#Oil seed rape									hypothetical protein	3-ketoacyl-CoA thiolase B, peroxisomal	IPR002155|IPR016038|IPR016039|IPR020615|IPR020616|IPR020617	Glycoside hydrolase, family 37|Glycoside hydrolase, family 37, conserved site|Neutral trehalase Ca2+ binding|Six-hairpin glycosidase-like
	UM591_3711	85.7542	PHI:598#THIOL#ABB55459#Reduced virulence#Leptosphaeria maculans#Phoma stem canker#Oil seed rape									3-ketoacyl-CoA thiolase A	-	IPR002155|IPR016038|IPR016039|IPR020613|IPR020615|IPR020616|IPR020617	Armadillo-like helical|Armadillo-type fold|Interferon-related developmental regulator, N-terminal
	UM591_6271	80.3841	PHI:696#NTH1#AAM92143#Unaffected pathogenicity#Leptosphaeria maculans#Phoma stem canker#Brassica juncea	GH37.hmm								neutral trehalase	Neutral trehalase	IPR001661|IPR008928|IPR011120|IPR018232	GPI-GlcNAc transferase complex, PIG-H component, conserved domain
	UM591_6402	68.071	PHI:1135#LmIFRD#GQ183869#Loss of pathogenicity#Leptosphaeria maculans#Phoma stem canker#Oil seed rape									hypothetical protein	-	IPR007701|IPR011989|IPR016024	Isocitrate lyase|Isocitrate lyase/phosphorylmutase, conserved site|Pyruvate/Phosphoenolpyruvate kinase-like domain
	UM591_6419	61.809	PHI:1040#Lmgpi15#AM905386.2#Reduced virulence#Leptosphaeria maculans#Phoma stem canker									hypothetical protein	-	IPR019328	Prion-inhibition and propagation, HeLo domain
	UM591_6428	87.8049	PHI:261#ICL1#AAM89498#Reduced virulence#Leptosphaeria maculans#Phoma stem canker#Oil seed rape									hypothetical protein	Isocitrate lyase	IPR006254|IPR015813|IPR018523	NAD(P)-binding domain|NAD-dependent epimerase/dehydratase|UDP-glucose 4-epimerase C-terminal domain|UDP-glucose 4-epimerase GalE
	UM591_6985	56.1024	PHI:597#LOPB#AAP40632#Reduced virulence#Leptosphaeria maculans#Phoma stem canker#Oil seed rape									hypothetical protein	-	IPR029498	Aspartic peptidase|Aspartic peptidase domain|Aspartic peptidase, active site
	UM591_8542	80.0532	PHI:1133#Lmepi#AM941452#Loss of pathogenicity#Leptosphaeria maculans#Phoma stem canker#Rye									putative udp-glucose 4-epimerase protein	-	IPR001509|IPR005886|IPR016040|IPR025308	Cation-transporting P-type ATPase|Cation-transporting P-type ATPase, N-terminal|H+ transporting P-type ATPase, subfamily IIIA|HAD-like domain|P-type ATPase, transmembrane domain|P-type ATPase, A domain|P-type ATPase, cytoplasmic domain N|P-type ATPase, phosphorylation site
	UM591_9886	88.3598	PHI:697#ugt51E1#AAM81358#Unaffected pathogenicity#Leptosphaeria maculans#Phoma stem canker#Brassica juncea		extr		A01.018	D103, Y146, D286	saccharopepsin (Saccharomyces cerevisiae)			similar to Vacuolar aspartyl protease (proteinase A)	Vacuolar protease A	IPR001461|IPR001969|IPR021109
	UM591_12355	81.9085	PHI:1041#Lmpma1#AM933613#Loss of pathogenicity#Leptosphaeria maculans#Phoma stem canker									hypothetical protein	-	IPR001757|IPR004014|IPR006534|IPR008250|IPR018303|IPR023214|IPR023298|IPR023299
Others	UM591_2306	52.649	PHI:222#PELB#AAD09857#Reduced virulence#Colletotrichum gloeosporioides#Anthracnose#Avocado	PL1.hmm	extr							similar to pectate lyase	Probable pectate lyase A	IPR002022|IPR011050|IPR012334	Pectate lyase/Amb allergen|Pectin lyase fold|Pectin lyase fold/virulence factor
	UM591_5563	53.3333	PHI:2476#CcpelA#G8AA67#Reduced virulence#Colletotrichum coccodes#Anthracnose#Tomato	PL1.hmm	cyto							similar to pectate lyase	Pectate lyase plyB	IPR002022|IPR011050|IPR012334	Pectate lyase/Amb allergen|Pectin lyase fold|Pectin lyase fold/virulence factor
	UM591_12017	51.8703	PHI:144#CHT42#AAC05829#Reduced virulence#Trichoderma virens#Mycopathogen#Rhizoctonia solani	GH18.hmm	extr							glycoside hydrolase family 18 protein	Endochitinase 1	IPR001223|IPR001579|IPR011583|IPR013781|IPR017853|IPR029070	Chitinase II|Chitinase insertion domain|Glycoside hydrolase, catalytic domain|Glycoside hydrolase, chitinase active site|Glycoside hydrolase, family 18, catalytic domain|Glycoside hydrolase, superfamily
	UM591_12466	81.8045	PHI:199#AOX1#AAF82788#Reduced virulence#Cladosporium fulvum#Leaf mold#Tomato	AA3.hmm								hypothetical protein	Alcohol oxidase	IPR000172|IPR007867|IPR012132	Glucose-methanol-choline oxidoreductase|Glucose-methanol-choline oxidoreductase, C-terminal|Glucose-methanol-choline oxidoreductase, N-terminal
	UM591_76	86.3636	PHI:2313#SCD#F8R4X8#Increased virulence (Hypervirulence)#Metarhizium anisopliae#Green muscardine disease#Diamondback moth									scytalone dehydratase	Scytalone dehydratase	IPR004235	Scytalone dehydratase
	UM591_313	88.3495	PHI:339#CLPT1#CAC41973#Reduced virulence#Colletotrichum lindemuthianum#Anthracnose#Bean									Ras GTPase	GTP-binding protein ypt2	IPR001806|IPR002041|IPR003578|IPR003579|IPR005225|IPR020849|IPR027417	P-loop containing nucleoside triphosphate hydrolase|Ran GTPase|Small GTP-binding protein domain|Small GTPase superfamily|Small GTPase superfamily, Rab type|Small GTPase superfamily, Ras type|Small GTPase superfamily, Rho type
	UM591_1132	98.8814	PHI:820#beta-tubulin#AAA34230#Resistant to chemical#Venturia inaequalis#Apple scab									beta tubulin	Tubulin beta chain	IPR000217|IPR002453|IPR003008|IPR008280|IPR013838|IPR017975|IPR018316|IPR023123	Beta tubulin|Beta tubulin, autoregulation binding site|Tubulin|Tubulin, C-terminal|Tubulin, conserved site|Tubulin/FtsZ, 2-layer sandwich domain|Tubulin/FtsZ, C-terminal|Tubulin/FtsZ, GTPase domain
	UM591_1285	52.194	PHI:101#ALB1#AAC39471#Reduced virulence#Aspergillus fumigatus#Respiratory disease#Mouse									hypothetical protein	Conidial yellow pigment biosynthesis polyketide synthase	IPR001031|IPR001227|IPR006162|IPR009081|IPR009799|IPR011008|IPR014030|IPR014031|IPR014043|IPR016035|IPR016036|IPR016038|IPR016039|IPR018201|IPR020801|IPR020806|IPR020841|IPR029058	Acyl carrier protein-like|Acyl transferase|Acyl transferase domain|Acyl transferase/acyl hydrolase/lysophospholipase|Alpha/Beta hydrolase fold|Beta-ketoacyl synthase, C-terminal|Beta-ketoacyl synthase, N-terminal|Beta-ketoacyl synthase, active site|Dimeric alpha-beta barrel|EthD domain|Malonyl-CoA ACP transacylase, ACP-binding|Phosphopantetheine attachment site|Polyketide synthase, acyl transfera…
	UM591_1296	70.063	PHI:862#ClaSSD1#BAE66713#Loss of pathogenicity#Colletotrichum lagenarium#Anthracnose#Cucumber									hypothetical protein	-	IPR012340	Nucleic acid-binding, OB-fold
	UM591_1387	61.7825	PHI:393#CpCOT1#CAH04535#Loss of pathogenicity#Claviceps purpurea#Ergot#Rye									hypothetical protein	Serine/threonine-protein kinase cot-1	IPR000719|IPR000961|IPR002290|IPR008271|IPR011009|IPR011993|IPR017441	AGC-kinase, C-terminal|Pleckstrin homology-like domain|Protein kinase domain|Protein kinase, ATP binding site|Protein kinase-like domain|Serine/threonine- /dual specificity protein kinase, catalytic domain|Serine/threonine-protein kinase, active site
	UM591_3192	51.3995	PHI:503#COX15#AAB64668#Reduced virulence#Saccharomyces cerevisiae#Mouse									similar to cytochrome c oxidase assembly protein cox15	-	IPR003780|IPR023754	Heme A synthase|Heme A synthase, type 2
	UM591_4133	54.7009	PHI:159#URA5#AAC62627#Loss of pathogenicity#Histoplasma capsulatum#Histoplasmosis (pulmonary disease)#Mouse									hypothetical protein	Orotate phosphoribosyltransferase	IPR000836|IPR004467|IPR023031|IPR029057	Orotate phosphoribosyl transferase domain|Orotate phosphoribosyltransferase|Phosphoribosyltransferase domain|Phosphoribosyltransferase-like
	UM591_4325	79.4845	PHI:2397#ChSte11#C6L683#Loss of pathogenicity#Cochliobolus heterostrophus#Maize									protein kinase byr2	-	IPR000159|IPR000719|IPR001660|IPR002290|IPR008271|IPR011009|IPR011510|IPR013761|IPR017441|IPR029458	Protein kinase domain|Protein kinase, ATP binding site|Protein kinase-like domain|Ras-association|Ras-binding domain of Byr2|Serine/threonine- /dual specificity protein kinase, catalytic domain|Serine/threonine-protein kinase, active site|Sterile alpha motif domain|Sterile alpha motif, type 2|Sterile alpha motif/pointed domain
	UM591_5379	73.9437	PHI:463#HSP90#AAA02743#Increased virulence (Hypervirulence)#Saccharomyces cerevisiae#Mouse									hypothetical protein	-	IPR001404|IPR003594|IPR019805|IPR020568|IPR020575	Heat shock protein Hsp90 family|Heat shock protein Hsp90, N-terminal|Heat shock protein Hsp90, conserved site|Histidine kinase-like ATPase, ATP-binding domain|Ribosomal protein S5 domain 2-type fold
	UM591_5958	54.4987	PHI:24#Avenacinase gene#AAB09777#Unaffected pathogenicity#Gaeumannomyces graminis#Take-all#Wheat	GH3.hmm	extr							hypothetical protein	Probable beta-glucosidase G	IPR001764|IPR002772|IPR017853|IPR026891|IPR026892	Fibronectin type III-like domain|Glycoside hydrolase family 3|Glycoside hydrolase family 3 C-terminal domain|Glycoside hydrolase, family 3, N-terminal|Glycoside hydrolase, superfamily
	UM591_6663	94.9875	PHI:2318#AaSLT2#D3J127#Reduced virulence#Alternaria alternata									mitogen-activated protein kinase	Mitogen-activated protein kinase spm1	IPR000719|IPR002290|IPR003527|IPR008271|IPR011009|IPR017441	Mitogen-activated protein (MAP) kinase, conserved site|Protein kinase domain|Protein kinase, ATP binding site|Protein kinase-like domain|Serine/threonine- /dual specificity protein kinase, catalytic domain|Serine/threonine-protein kinase, active site
	UM591_7584	83.908	PHI:2312#THR#O93802#Increased virulence (Hypervirulence)#Metarhizium anisopliae#Green muscardine disease#Diamondback moth									hypothetical protein	Trihydroxynaphthalene reductase	IPR002198|IPR002347|IPR016040|IPR020904	Glucose/ribitol dehydrogenase|NAD(P)-binding domain|Short-chain dehydrogenase/reductase SDR|Short-chain dehydrogenase/reductase, conserved site
	UM591_7760	52.1368	PHI:433#CTB1#AAT69682#Reduced virulence#Cercospora nicotianae#Tobacco									polyketide synthase	-	IPR001031|IPR001227|IPR002777|IPR009081|IPR014030|IPR014031|IPR014043|IPR016035|IPR016036|IPR016038|IPR016039|IPR018201|IPR020801|IPR020806|IPR020841|IPR029058	Acyl carrier protein-like|Acyl transferase|Acyl transferase domain|Acyl transferase/acyl hydrolase/lysophospholipase|Alpha/Beta hydrolase fold|Beta-ketoacyl synthase, C-terminal|Beta-ketoacyl synthase, N-terminal|Beta-ketoacyl synthase, active site|Malonyl-CoA ACP transacylase, ACP-binding|Polyketide synthase, acyl transferase domain|Polyketide synthase, beta-ketoacyl synthase domain|Polyketide s…
	UM591_10951	65.3216	PHI:24#Avenacinase gene#AAB09777#Unaffected pathogenicity#Gaeumannomyces graminis#Take-all#Wheat	GH3.hmm	extr							hypothetical protein	Probable beta-glucosidase G	IPR001764|IPR002772|IPR017853|IPR026891|IPR026892	Fibronectin type III-like domain|Glycoside hydrolase family 3|Glycoside hydrolase family 3 C-terminal domain|Glycoside hydrolase, family 3, N-terminal|Glycoside hydrolase, superfamily
	UM591_12717	61.9289	PHI:339#CLPT1#CAC41973#Reduced virulence#Colletotrichum lindemuthianum#Anthracnose#Bean									hypothetical protein	Uncharacterized mitochondrial carrier C1682.09c	IPR001806|IPR002041|IPR003578|IPR003579|IPR005225|IPR018108|IPR020849|IPR023395|IPR024156|IPR027417	Mitochondrial carrier domain|Mitochondrial substrate/solute carrier|P-loop containing nucleoside triphosphate hydrolase|Ran GTPase|Small GTP-binding protein domain|Small GTPase superfamily|Small GTPase superfamily, ARF type|Small GTPase superfamily, Rab type|Small GTPase superfamily, Ras type|Small GTPase superfamily, Rho type
