# Supplementary material for: Genomic insight into pathogenicity of dematiaceous fungus Corynespora cassiicola
Source: PeerJ. 2017 Jan 26;5:e2841. doi: 10.7717/peerj.2841 (PMC5274520; doi:10.7717/peerj.2841)
Supplement: Supplemental Information 6 [file peerj-05-2841-s006.xlsx]

## Sheet: Supplementary Table S6
	Supplementary Table S6: Summary of CAZyme virulence factor gene with description from MEROPS, Lipase Engineering database and Phi-base.
	Virulent Factor		CAZyme	Secreted Peptidase					Lipases		Gene annotation
Gene	% PHI identity	PHI description	Family	Localization	Cysteine content	Peptidase family	Peptidase active site residue	MEROPS description	Lipase identity	Lipase Engineering Description	NR description	SwissProt description	Interpro ID	Interpro description
UM591_7102	52.6946	PHI:2383#MfCUT1#Q2VF46#Increased virulence (hypervirulence)#Monilinia fructicola#Brown rot#Almond	CE5.hmm	extr	high_cysteine				50.5556	Cutinases	carbohydrate esterase family 5 protein	Cutinase	IPR000675|IPR029058	Pectate lyase, catalytic|Pectin lyase fold|Pectin lyase fold/virulence factor
UM591_6311	50.8876	PHI:2383#MfCUT1#Q2VF46#Increased virulence (hypervirulence)#Monilinia fructicola#Brown rot#Almond	CE5.hmm	extr					59.1837	Cutinases	cutinase precursor	-	IPR000675|IPR011150|IPR029058	Alpha/Beta hydrolase fold|Cutinase
UM591_2724	52.3529	PHI:2383#MfCUT1#Q2VF46#Increased virulence (hypervirulence)#Monilinia fructicola#Brown rot#Almond	CE5.hmm	extr					61.0256	Cutinases	hypothetical protein	Cutinase	IPR000675|IPR011150|IPR029058	Alpha/Beta hydrolase fold|Cutinase|Cutinase, monofunctional
UM591_7944	63.5179	PHI:2204#endo-1,4-beta-xylanase [GH10 family]#MGG_01542#Reduced virulence#Magnaporthe oryzae (related: Magnaporthe grisea)#Rice blast#Barley	GH10.hmm	extr					74.8485	Xylanase esterases	similar to endo-1,4-beta-xylanase A precursor	Endo-1,4-beta-xylanase F3	IPR001000|IPR013781|IPR017853	Chitin synthase|Nucleotide-diphospho-sugar transferases
UM591_8527	63.6364	PHI:785#MGG_04128#EDJ99431#Reduced virulence#Magnaporthe oryzae (related: Magnaporthe grisea)#Rice blast#Rice	GH125.hmm	extr							hypothetical protein	Meiotically up-regulated gene 157 protein	IPR008313|IPR008928|IPR012341	Alpha/Beta hydrolase fold|Alpha/beta hydrolase fold-3|WD40 repeat|WD40-repeat-containing domain|WD40/YVTN repeat-like-containing domain
UM591_12017	51.8703	PHI:144#CHT42#AAC05829#Reduced virulence#Trichoderma virens#Mycopathogen#Rhizoctonia solani	GH18.hmm	extr							glycoside hydrolase family 18 protein	Endochitinase 1	IPR001223|IPR001579|IPR011583|IPR013781|IPR017853|IPR029070	Chitinase II|Chitinase insertion domain|Glycoside hydrolase, catalytic domain|Glycoside hydrolase, chitinase active site|Glycoside hydrolase, family 18, catalytic domain|Glycoside hydrolase, superfamily
UM591_8532	55.6075	PHI:434#GEL2#EAL88984#Reduced virulence#Aspergillus fumigatus#Aspergillosis#Mouse	GH72.hmm	extr							hypothetical protein	1,3-beta-glucanosyltransferase gel2	IPR004886|IPR013781|IPR017853	Glucanosyltransferase|Glycoside hydrolase, catalytic domain|Glycoside hydrolase, superfamily
UM591_7563	50.3788	PHI:522#GAS1#AAX78216#Reduced virulence#Fusarium oxysporum#Vascular wilt#Tomato	GH72.hmm	extr	high_cysteine						carbohydrate-binding module family 43 protein	1,3-beta-glucanosyltransferase gel4	IPR004886|IPR012946|IPR013781|IPR017853	Glucanosyltransferase|Glycoside hydrolase, catalytic domain|Glycoside hydrolase, superfamily|X8
UM591_2306	52.649	PHI:222#PELB#AAD09857#Reduced virulence#Colletotrichum gloeosporioides#Anthracnose#Avocado	PL1.hmm	extr							similar to pectate lyase	Probable pectate lyase A	IPR002022|IPR011050|IPR012334	Pectate lyase/Amb allergen|Pectin lyase fold|Pectin lyase fold/virulence factor
UM591_6450	53.5211	PHI:179#PELA#AAA33338#Reduced virulence#Nectria haematococca (related: Fusarium solani)#Root rot#Pea	PL3.hmm	extr							Pectate lyase catalytic	Probable pectate lyase D	IPR004898|IPR011050|IPR012334	Gamma-glutamyltranspeptidase|Nucleophile aminohydrolases, N-terminal
UM591_6291	59.1489	PHI:180#PELD#AAC49420#Reduced virulence#Nectria haematococca (related: Fusarium solani)#Root rot#Pea	PL3.hmm	extr	high_cysteine						hypothetical protein	Probable pectate lyase F	IPR004898|IPR011050|IPR012334	Pectate lyase, catalytic|Pectin lyase fold|Pectin lyase fold/virulence factor
UM591_11210	62.0408	PHI:179#PELA#AAA33338#Reduced virulence#Nectria haematococca (related: Fusarium solani)#Root rot#Pea	PL3.hmm	extr	high_cysteine						hypothetical protein	-	IPR004898|IPR011050|IPR012334	Aromatic-ring hydroxylase-like|Monooxygenase, FAD-binding
